# Supplementary material for: Along the Axis between Type 1 and Type 2 Immunity; Principles Conserved in Evolution from Fish to Mammals
Source: Biology (Basel). 2015 Nov 17;4(4):814–59. doi: 10.3390/biology4040814 (PMC4690019; doi:10.3390/biology4040814)
Supplement: Supplementary File 1 [file biology-04-00814-s001.zip › biology-4040814-supplementary 2.pdf]

# Supplementary Materials

## Supplementary file 2

### (Predicted) ORF Sequences of the Immune-Signature Genes Analyzed in Table 1.

In cases where GenBank accession numbers are not given, the sequences were assembled from SRA reads.

#### Elephant Shark

##### *TH1-Signature Genes*

##### **T-bet (XM\_007909399)**

ATGTTCCCGTTCCTGAGCTTTAACATCACGGGGCTGGAGCCCACGGCTCACTACAATGTCT  
TTGTGGACGTGGTCCTGGCTGACCAGCATCACTGGAGGTACCAGGGCGGCAAGTGGGTGC  
AGTGTGGCAAGGCGGAGGGCAGCATGCAAGGTAACAGGACGTACATGCACCCAGACTCG  
CCCAACACTGGAACCCATTGGATGCGGCAGGAAATCTCGTTCGGGAAACTCAAACCTGACG  
AATAACAAGGGAGCGTCCAACAATGTCACTCAGATGATCGTGCTCCAGTCGCTGCACAAG  
TACCAGCCACGGCTGCACATTGCGCCGGTGAAGGAGGACGGCTCTGACGACCCCTATCTC  
ACCCCCAAGCTTCAGGCCTTCAGCTTCCCCGAGACTCAGTTCATCGCTGTCACCGCCTACC  
AGAATGCAGATATCACACAGCTCAAGATTGATCACAATCCCTTTGCCAAAGGATTCCGAG  
ACAACCTTTGACTCGTGA

##### **STAT1 (XM\_007890161)**

ATGTCTCAGTGGTATGAGTTACAACAGTTGAATTCCAAGTTCCTGGAGCAAGTCGATCAG  
CTTTACGATGACAACTTTCCAATGGAAATCAGACAGTATCTTGGACATTGGCTGGAGACC  
CAGGATTGGGAGCACGCTGCTACGAATGACTCCATGGCCACTCTGCTCTTCCATGAAATG  
TTGGTGCAGCTGGATGATCAGTACAGCCGCTTCACCTTGGAGAACAACCTTCTTACTACAG  
CACAACATCAGAAAAATCAAACGCAATCTTCAGGTTTTCTTCCAGGAAGATACTATTTATA  
TGCGCTTGACGATATCCAACCTGCCTTAAGGAAGAAAAGAAAATTCTAGACAATGCTCAGA  
AAGCTGAACAGAACCACATTGGTCATATCCAGAACACTGTTATCCAGGATAAACAAAAG  
AAGCTTGACCAGAAAGTGAGAAACGTGAAGACTGGCGTCCAGGAAATTGAACAGGAAAT  
CAAATCTCTTGAAGATCTTCAGGATGAATTTGACTTCAGATCCAAAACGCTGCAGAGTCG  
AGAGTTGGAAGTGAACGGCTTGGCTCAAAATGAGATTAAACAAGAAAAGCTTCAAATCC  
ACAACATGAAGTTGACTCTGGATAAGAAACGAAAGGAAGTGATCAACAAAACCGCTTGTC  
TCCTGAATGAAACGGAACAGATTAATGGCATTCTGATCAACGAAGAACTATTGGAATGGA  
AACGTCGGCAGCAGATTGCTTGCATCGGAGGACCTCCAAACACTTGTCTTGACCAGCTCC  
AGAAGTGGTTCACACTGGTGGCTGAGAGTCTGCAGCAGGTTTCGACAGCAGCTGAAAAAG  
CTGGAAGAATTGGAGCAGAAATATTCGTACGAAGGAGACCCCATCACCCAAAACAAGCAG  
TTCCTAGAGGAACGAAACAACAACCTTGTCTGCAACCTTATTGTGAGTTCCTTTGTGGTAG  
AGAGGCAGCCTTGCATGCCCACCCACCCCCAGAGGCCGATGGTCCTGAAGACCGGCGTCC  
AGTTCACTGTGAAGCTCAGACTCCTGGTCAGGCTCCCCGAGCTAAACTATCAGTTGCGGG  
TGAAGGCGTTATTTGACAAGGATGTCACTGAAAAGTGTTTCGGGAAAGGGATTTAGAAAAT  
TTAACATACTTGGGACAAACACAAAGGTCATGAACATGGAGGAATCAACTAATGGAAGT

TTGGCTGCAGAGTTCCGACATCTGCAACTGAAGGAGCAGAAAAATGCAGGCACCAGAAC  
GACTGAAGGCCCTCTCATTGTGACTGAGGAGCTTCACTCCATCAGCTTTGAGACTCAGTTC  
TGTCACCAAAACCAGATAATAGATCTTGAGACTACATCTCTCCCGTTGGTTGTCATCTCCAA  
TGTTAGCCAGCTCCCCAATGGCTGGGCCTCTATTCTCTGGTACAACATGCTCGTAAGCGATT  
CCAAGA ACTTGGCATT TTTTCAACAACCCCCCAGTTGCCAAGTGGAGTCAGCTGTCTGAGGTA  
CTGAGCTGGCAGTTCTCCTCGGTCACCAAGAGAGGCCTTAGCGTCGAACAGCTCAGTATGC  
TGGGCGAGAAATTGCTAGGTCTGAATAACTGCTTCAATGATAATGGGATTCCATGGACAA  
GATTCTGCAAGGAGAATCTAAATGAAAAACCTTTTCTCATTCTGGCTCTGGATCGAAGGGA  
TTTTAGAATTGATTAAAAAACATCTTCTTCTCTGGAATGATGGCTGTATCATGGGGTT  
CGTAAGTAAGGAGAAGGAGCGAACTTTGCTGAAGGACAGAAACCCGGGAACCTTTTTACT  
GAGGTT CAGTGAGAGCAGCAGAGAAGGTGCCATCACGTTTACCTGGGTAGAGAAGTCAC  
CAACTGATGAGTCTCAGTTTCATTTCGGTGGAAACCGTACACAAAGCATCAATTATCCGCAG  
TTACCTTCCCAGACATCGTTTCGGAATTACAAAGTCATGGCAGCCGAGAACATTCCGGAAA  
ATCCACTGAAGTACCTGTACCCTGATCACCCCAAAGATCAGGCATTTGGAAAGTATTACTC  
CAGACCAAAAGATCCTGCAGAGCCTATGGATGTGGATGATTCCAAGACCAGTGGTTACAT  
AAAGACTGCACTCATTT CAGTGTCTGAAGTTCACCCATCTAGGCTGCAGTCAACAGAAAAT  
CTTCTACCTATGTCCCCAGAAGAGTATGGTGAACTCGAACGTCAACTGAGTCCATCTGAAA  
TGGACACAGTGATGTGCTCATATTCAAATTAA

**STAT4 (XM\_007890162)**

ATGTCCCAGTGGCATCAACTGCATCAGCTGGACTCCCAGTTCCTGGAACAAGTGGACCAG  
ATGTACGATGACACTTTTCCCATGGAAGTCCGACAGTTCCTAGCACATTGGTTGGAAAACC  
AAGACTGGGAACTTGCGTCAAGGAATGAATCTTTGGCCACACTTCTGTTTCATAATTTATT  
AAAACAAATAGACGACCAGTACAGCCGCTTCTCTATTGAAAAAACTTCTTACTTCAGCAC  
AATCTGAAAAGAATTAAACAAAACCTTCAGGTACAGTACCTGGGGAACCCCTTTGCACATG  
GCATCAGTTATCGCTGCCTGCTTGAGGGAAGAGCAGAGGATTCTGGCAGCAGTGAACACA  
CCGGAGCAGGGGGACGAGGAAAAAATCATGCAGAACTCAATGATTTTCGGAAAGACAGAG  
AGAACTGGAACAGAGAATGACAGCCATGAAATCCAATGTACAGGTGGTCGAACAGGATG  
TAAAGTTCCTCGAGGACCTGCAGGATGAATTTGATTT CAGATACAAGACACTACAGACAC  
AAGAACTGTGATAGGAACAGTATTCATGTGAAGGAGGAAGTTTTCCGGTTACAAGGAA  
TGCTTAACCAACTGGATCATAAAAGAAAGGAGATTCTCCAAAAAATCACAGAACTGTTGA  
ACCAAATGGATTTTCTCATGAACAGACA ACTGATAGAAGAGCTGATAGAATGGAAGCGG  
CGACAGCAGATCGCCTCCATCGGAGGGCCTCTGAACACATGCCTCGATCAGCTGCAGAAC  
TGGTTCACGATGCTAGCAGAGAGCCTGTTTCAGGTCAGGAGACAAGTGAAAAAACTGGA  
AGAGCTGCTGCAGAAGGTGACTTATGAAGGTGATCCTGTTCCACTGCAGAGACCCCACTT  
GGAGGAAAAAGTAAACATTTTGATCTACAGCCTCATCAAAGTTTCCTTTGTGGTGGAAG  
GCAGCCTTGCATGCCACCCATCCCCAGAGACCCATGGTCCTCAAGACTGGAGTCCAGTT  
CACTGTCAAATAAGGTTTTTGGTAAAATTGCCCGAACTGAACTATCAGCTAAAAGTGAA  
AGCTACAATTGACAAGGAAAGTCTAACTGCAAGAGGCTATCGTAAGTTCAATATCCTAGG  
CACTAATTGCAAAGTAATGAACATGGAGGAGTCAGTGAATGGAAGCCTTTCTGTGGAATT  
CAGGCATTTGCAACTCAAAGAACAGAAATCCTCTACAGGAACCAAAGGAAATGAGGGTCC

TCTGATTGTGACAGAAGAGCTCCATTCAATCAATTTTGAGACACAGTTTTGTCACCAGGAT  
TTAACAATAGATTTAGAGACCAGTTCTTTGCCTGTCGTAGTCATCTCCAACGTGTGTCAGC  
TACCCAGCGGCTGGGCCTCTGTTATATGGTACAACATGCTGATGAACGACCTCAAGAATTT  
GGCTTTCTTCACCAACCCGCCTGCTGCCATTTGGAGTCAGCTTTCAGAGGGTGCTGAGCTGG  
CAGTTCTCATCTTATGTGGGTCGAGGTCTCAATTCTGACCAACTAAACATGTTGGCAGAG  
AAACTACTTGGACAACAACCTGAATTATAATGATTGCCAAGTTTCGTGGAGTAAATTCTGT  
AAGGAGACCCCTCCCTAATCGGTTTCAGTTTCTGGCTTTGGTTGGATGGGATCTTGGAACCTG  
ATCAAGAAACACCTTTTGGCTCTCTGGATAGATGACTACATAGTGGGATTTGTGAGTAAG  
GAGAAGGAGCGAGCTTTACTGAAAGACAAGCTGCCAGGGACGTTTTTACTGAGGGTTCAG  
CGAGAGCAGCAGGGAAGGCGCTATCACATTTACTTGGGTGGATCGGTCAGAGAATGGGG  
AAATGAGACTTCATTTCAGTGGAACCTTACTCCAAGAGTCAGCTGTTAGCTGTTCCCTTTCG  
CTGACATCATTCGCGACTACAAAGTAATGGTGGCTGAGAACATTCCAGAGAACCCCCCTGC  
AGTACCTGTATCCTGACATCCCGAAGTATAAAGCCTTTGGCAAACATTACAACAATAAGC  
CGAAAGAAGTTTCTGAGCCACAGAGACAGAGAAGAAAGGGTATATCTCCTCAAGGTTT  
ATCCCGTTCTCTGAATTTCCAAATGCTTCCACAGCCCCAGTTTCCTCATCAGACCTACTTC  
CCATGTCACCGGGAGTATATGCTGAACTGAAACAGCAACTGAGTCCAGCAGAAATCGAG  
ACTGCTGTATGTTTTGAAGAAATGATTTGA

**IFN $\gamma$  (XM 007904994)**

ATGAAGCTGTGTTTCATCATTGGGTTGGTCACTTGTCTACTATTACTGGGCTCTGCGAGCT  
GTGACCGTCTGCAGGACGAAATTAATAACCTGAAATCGCACTTTGATACAAGCAGTCATG  
AGGTGGCTGACGGTGGGCCGCTATTTTTGAATATGCTGGAGAAGTGGAAGGGCTCGCCTG  
AATCGGGGATTGTGTTTCATCGGATACTACTCTGGTACGAAAATTTCTTTAAAAACATCAA  
AGGGGCTCCTGGAAAGAACAAGGAACCTGGACATTAGCAACATTGGGAATCTCATTTCTAA  
GTGGATAGTAGAGGACAGATACAAACCAGTGGAACCTGAAATATGATCTCGATAAATTAGA  
CAATATTCAGTGGAATAAACAATTAGTCCAACGCAAAGCAGTCCTTGAACCTTGAAATGCT  
ACTACCAAGAATGAATGTAAATGGGAGAAGAAGACGCAGAAGCAACATGGGAGGTTAGA  
AGGCGATCAAGGACTTAA

*Th17-Signature Genes*

**IL-17A like 1 (SINAMT00000016888)**

ATGGTGATGTTGAAATGGGTGCTGTGCTTTGTGCTGGCCATCACTCTGCCGTGTGTGTCAG  
CACGAGGAGCTCACAGGAGAGGCTGTGGGAGACAAGTCGGCCGGAGGTGCTCAAAGCAG  
CAGAAGTTCATGCTGAGGTTTCAGAGAAGCAAAGCCCCTGTCAACCTGGCTCCCTGGGAAC  
TCTGGCTATAGCAACCGCTCCATCTCCCCCTGGGTCTACAGGAAAGATGTTGACCTTGACC  
GGTACCCAGACATCATAGCGATGGCGGAGTGTATCCACACTCACTGTGTCACTGCTCAGGG  
GCACCTGGACCTGGGCCTGAACTCACGCCCAGTGCAGCAGGAGATGGTAGTGCTGAGGAG  
GCAGCGCCATGGCCACAAGCTCACCTACCTGGTGGACAAGATGGTCGTTCCCATCGCCTG  
TGTGTGTGTCCGTCCCCAGTTAGTTCAGGCCTGA

**IL-17A like 2 (SINCAMT00000018117)**

ATGATGGTTAAAGCCGCCCTGAGCTTTGTGCTGGTCATGGCTGCGCTGTGTGTGTGTCGGCG  
AGAGCTGCTCCCACCAAAGGCAGTGGGAAAGCAGACCAGGAGGGGGGCGGGAGCGAG  
GCCGCTACCAACATCAGCCAAAGTACACGCTGAGCTTCAGAGAGAGCCCCGGGAGCAGC  
GACTGGAGCCGAGGTCACAGCCAGGACCAGGGCCACGGCCAGGGACATGCAGGCATCAA  
AAGCCGGTCCATCTCACCGTGGATTTACAAGAACAATTATGACCCTGATCGATACCCAGC  
CACCATCTGGGAGGCTCACTGCGTCCACTCACACTGTATCAACGCCAGAGGCAAACCTGGA  
TGAAGACCTGAACACACAGCGAGTCTGGCAGAGAGTGCTGGTCCTCAGGAGAGAGTCCA  
GCGCCAGCAAACCTCAACTTCCTGGTGGAGGAGATAACCGGTACCAGTCGCCTGTGTGTGTG  
TCCGCGCTCGCGTTCTCCAGGCCTGA

**IL-21L (Dijkstra *et al.* 2014 [1])**

ATGAACAGGATCATCTTTTACAGCTTCATCCTCGCTGCTTTCATTGCTGTTCTTCATGCAGC  
TCCCAGACGTGATCATGTGGTTCTGAAAGAGATGATGAAGGATGTCCGAAATTTGAAAAA  
AATGTTTGGGCAATCTGGCGTTACAGTTCGCACTACAGAAAGCAAATTGGATAACCTTTCC  
TGTTACATGGCCGAACATAAAAGGCCTCAAGAAATCCCGGATGCAAATTAATACCGTAGAA  
AAACTGAACAGAAAAAGCAAAACAGCTGAACCTTTTAAATATCGACTGCCCCAACAGTGAA  
AATTACATGAAGAACAGCCTCGAACAGTTCCTGAATCAATTTTATGTACATCTGCAAAAG  
AAATTCCATGCAGCTGTCAAGGTCGGTCAGCAGCTCAATAAAGTTCAGGTGAACATTTAA

**IL-22 (XM 007904995)**

ATGCCTTGCCTTTGGAGTCCAGCAGTATTGGTCCTTGGCTATGCCACTCTCCTGGTCAACT  
GTGCACCGTGTAAGGAGTCTTGCCATGTGGATAAATATTACATGCATTTTCATGCGACCCA  
CTATCTTTGACCTGTCAAAAGAGGCTCAAGAGCATGACAAGGATACAGCAACAAGACTGAT  
AGGAAAGAAGCTGTTCCAGGGTCTTCAGGAAGAGGACAAATGCTATCTGCTCCACAAAGT  
TGTTGACTTCTATTTGAGAAATGACCTGGCATCTGAAGAACTGCACAGGAAATATTCACAT  
ATCAAAAAAGTCAGGGAGGCGTTTACCACTCTGAAAATGAGCATATCTAAATGTGATGTT  
CAAGAAATGAAGAAAGTAGATCACAACTTGAAGAGCTAGAACGGGAAGTGAGGAAGCT  
CGGAAAGAACAGAGAGGCCAAGGTTGTAGGAGAGCTGTACATGCTATTTTCAGGATATAGG  
GAAATATTGTTCAAAACCAAGAAGTGGAAAGAAAGATTGA

*T<sub>reg</sub>-Signature Genes***Foxp3 (XM 007885996)**

CTAACCGCTGAGCTGCAGGACGGCACAGATGAAACGTTAACGTGGATTAACCCTTTCCGT  
TCCTCGCCACAGAAACCAGGGGAGGCCGGAGCGAGCAGCGTGTTTCGAGGAGAACAGAGT  
GGGTGTCAGAAACAGCGGGAAAGCTTGGACTCAAGTCTGGGACAAACACACCACTCTCT  
ACCCAGACGTGAGTTCGAATCTGGAATATTACAGAGTCTATAATATCAGGCCACCGTTTA  
CATACGCAGCTCTGATCAGATGGGCTATTCTGGAGACCAGTGAGAAACAGATGACTCTGA  
ACGAAATCTATCTCTGGTTTCAAGGAAGTTTGCTTTCTTTCGCAACAACACAGCTACCTG

GAAGAACGCGGTGAGGCACAATCTGAGTCTCCACAAGTGTTTTGTGAGAGTGGAGAATAT  
GCGAGGAGCTGTGTGGACAGTGGACGAAATGGAGTTTCAGAGACGGAAATCACCGAAAA  
TCACCAGCAGAGACATGCAAATGAGATGGGAGTCGCACTAA

**IL-10 (XM 007899549)**

ATGCAGCGTGCAACTGTTGTTCTGTGGATGCTGCTCACGCTGTTTAATATTCAGTGTTGCT  
GTTGCAGTCATAGACAGGCAGCTGGGCTATGCCTTAGCACATCTGTGCTGCATATTCATCT  
CAGAGAACTCAGGACAGCTAATCAGAAAAATAAGCAGCTATTTTCAAAGGAGAGACGGCA  
ATATTCGTGTATCGCTGCTGAGAGGGAAATTTACAGCATGAATTTAAGGGTCGTTTAGGAT  
GTCAGTTTTTTGAAGGAAATGTTAGATTTCTACCTCAGTCACATAATCCCAGCCGCCAAGAC  
GCAAAGCAAAGCCTACAACACCCACATCAGTAAAATCGGGAACACGCTGTTTCGAACTAC  
AACAGAACATAGAGAATTGCCACCAACTCTTTAACTGTGACACCTGCAACTGCAATCGCA  
GTAATTACATCGAGGAGATATACAACATGTACAAGAAGTTGCAGGATAAAGGTATATAC  
AAGGCTATGGGAGAGCTCAACACCTTTATTGACTGGCTCGATAGGTTTCTGTGATGAAA  
CTGAAAGGAGCGAACAAGAAGAGAAAGTGA

**TGFβ1 (fragment on scaffold 19954)**

ATGCATAACCTGTCCTCCCACAAAGACGAAAAAAAAACTGCCGCGTCCATCAGTTGTACATA  
AACTTCCGGAACGATTTGGATTGGAAATGGATCCACGAACCCAAAGGATATTACGCCAAT  
TTCTGTATGGGGCCCTGTCCTTATATCTGGAGCGCAGACACCCACCA

*Th2-Signature Genes*

**GATA3 (XM 007885971)**

ATGGAAGTGGATCAGCCGCGTTGGATGACACATCACCATCCAGCGGTGTTAAATGGACAG  
CACCCGGATTCTCACCATCCCGGGCTCAGCCATGGCTATGTGGACTCCTCGCCCTATCTCC  
CGTCCGAAGAAGTGGATGTACTGTTCAACATCGACAGCCAAGGCAACCACGTCTCGTCTT  
ATTATGGCAACTCGGTCAGAGCCGCCGTTTCAGAGATATCCACCGCCACATCACGGGAGTC  
AGGTCTGCCGTCCTCCCTTGCTTCACAGCTCCCTGTCCTGGATAGATGGAGGCAAGGCTCT  
TGCCTCCCACCACAATGCTTCGCCATGGAATCTGAGTGCTTTCAGCAAGGCCCCCTTCAC  
CACGGCTCCCCGGGGGCTCTTTAGTCTACCCTCCATCCTCCTCCTCGTCCCTCTCCACAG  
GACATTCCAGCCCCACCTGTTACCTTCCCCCGACCCACCCAAGGATGTCTCCCCGA  
CCCTAACATCTCCGGTGCTGGATCCAACGGCTCGGGCCGACAGGAGGACAAGGAGTGCGT  
GAAATATCTGACCGAGGGAATGAACTGGAGACATCCTCTCACCTGAGAGGCAGCATGG  
GATCACTAGGAGGAGGTGCGAGCTCGGCACATCACCCCTGGCTTCTTACCCGCCTTACG  
TCTCAGAGTATGGCGCTGGGCTGTTCCCCCTGGCAGTCTGTTGGGTGCGTCTCCCCCAGG  
CTTCCCTTCGAAAGCAAGACCCAAGGCCCGCTCCAGCACAGGGGATCGGGAAAAAATAC  
CTCGGGACTGTAAATTGCACCATTTGGAGGTTGACCGAGCAAGCTGTAGTGAGCTGGGCA  
TTTGTTCAATTCGACATTTTAATAGAAGGTCGTGAATGTGTGAACTGTGGAGCCACTTCTAC  
TCCACTGTGGAGAAGAGATGGGACAGGACATTATCTGTGCAATGCCTGTGGTCTGTACCA  
CAAAATGAATGGGCAGAACCGACCACTCATTAACCCAAGAGGAGATTGTCTGCTGCCA

GGCGAGCGGGCACATCATGTGCTAACTGCCAAACGACCACCACCACATTGTGGAGAAGG  
AATGCCAATGGGGACCCTGTGTGCAACGCGTGTGGATTGTATTACAACTACACAACATT  
AACCGACCACTGACCATGAAGAAGGAAGGCATCCAGACGAGGAACAGGAAGATGTCCAG  
CAAATCCAAAAAGGCCAAAAAATGCCACGACGGGCTGGATGAGTTCTCGAAGAGCCTGA  
TGGAGAAAGCGAGCTCCTTCAGCCCTGCCACGCTCTCAAGACACATGTCTCCCATCGGGC  
ACATCCCACACTTCAGCCATGCAGGCCACATGCTGTCGACACCGACACCCATGCACCCCT  
CGTCCGGCCTCTCCTTCGGACCCCACCATCCCTCCAACATGGTCTCCGCCATGGGATAA

**STAT6 (SINCAMT00000012771)**

ATGTCTCTCTCTAACCGCCGGTGGCTGTTCCAGGACCGGTTGCCGTTCCACATCCCGGAGC  
GAGTGCTGTGGGGAGCCATGTGTGCGACGCTGGACATGAAGTTCACGGCGGAGGTTTCAG  
GCTCCACAAGGTCTGTGCCCCGAACACTTCCTCTTCCTCGCTCAGAAGGTGTTTCGACGAAC  
AGACTTACAGCCAGGACTTCAGTGCCAGGATGGTGTCTTGGTTCACAGTTTAACAAGGAGA  
ATTTACCGGGGAGAACGTTCACTTTCTGGCAGTGGTTTGACGGGGTGATGGAGCTCACCA  
AAAGACACCTGAAAGATTACTGGAACAACGGGTAG

**IL-4/13A (contig 23087; Dijkstra *et al.* 2014 [1])**

ATGTCGAAGGCCGTGAGCATCATGATCGTTCTGATGACAGTCTTCGCCAGAAGCGACTGC  
GGAGTTCTGAGAGAGATATTATCCAAACGGCAGGCCATGGGGGAACTCATTCAAACCTCTG  
TTACAGTTAACTGCAGGAGAGGTTGCTTGTGGTAACACCATGGTGGCTGATGTTGTATTG  
CTGGAAACGCGGCACCTGAATCGTTCTGCAAAGCTGCTAGAGCGTTGCTGCAAGCACCTT  
CGTGCAAACCCATTGAACAGCAACTGAACAACCTGATCATAAACCTGCAAATAACAGGA  
GTGGAGACATCCAACCTGCTCCCTTGACGAAAATTCTGAGGTTGAAATGAGCACCTTTCTG  
ATAAGCCTGAAGAAATTCTGCAAAAAAGTCTTCAGCTTGCAATAA

**IL-4/13B (XM 007902042; Dijkstra *et al.* 2014 [1])**

ATGGCTCACATACTGAAAGCTGCAGCTCTCCTCTCTATCCTATTGAGTGCTGTGTGTGCCA  
CTCAGATCACCACAAAGGCCAGACATCAGTCTCTGAAGGAGATCATCAGTACCATCCGGC  
ACATTTTAGAAAACCAGGTTTCATCATCATCAAAACCACGTGCCAGAGATATTCGAGGACG  
TAAAGGATCGCAGTGATTCAGAGGTTTTTTGCAAAGCGGCCCAAGTCCTGGAGTTGCTTC  
CATTTTACAATAACCTCAAAGAATTGCACAAACTTCGACACAACCTAATTCACATGGGAG  
GGCAGATAACTGAGTGTGAAGTCAGTGAACCTTCTCAGGTCGAGTTCAAAAACCTTTCTGA  
AAAGACTGTTGAACTTCTCCCAGAAGAAATTTAGGACAAATGGTGACAAGAATCATTGA  
CGACAAAATCGAAGGGTTGA

**IL-4/13C (contig 23087; Dijkstra *et al.* 2014 [1])**

ATGAAGCCACTTACAATCGCGTTCATGTTTCTCGTCCTGACCTTCTCCGAAGGCTGCAAAT  
GCAGGGCAGTGACTGAAATTATCACAGACCTGGGCTTTCTGGAAAAACACATGGCAAAA  
CTGGTCCCGGTCATTTGGAATGAAAACATCAGAcCATCCAACGGGTCTGTTTCTTGCAAAT  
CCCACGATGTGCTGAGAAAGACTGTGTTGAACAGAAGTGGCTTCGTAGCGAAACGTACTG

AGCAATTGATCCACAACCTTTTAGCTGTGGGCAGTGTGAATCAGACGTGCGTGCTGAACG  
CGCGGTCGGAATCGACCTGCCCCGCCCTGCTGAAAAGCCTGAAGAACGAAATGAGGCGG  
AGGTTGTGA

**IL-4/13D (XM 007902044)**

ATGACTATGATGCTGAAAATTTTGAAGTGTCTCACTGCCATGCTGGCTGTCAGCTATGGAA  
AGGTTGACCCCAAGAAACATATCTTAAGGGAAATCACCAAACTCTGGGACATATGACCC  
AGGACAAGATTGAATGTGGTGCTACTCTAATCCCAGATGTCTTCAGTGATACGAAGGGGC  
AGAGTGCATCGGAAATCTTTTGCAAGGCTGCCGAAGCTCTGGTGAAAATACCTCCCTGCG  
AGTCCATCAAACGTCACCTTGAAGGCTCTGAGATTAACTTAGCGAAGGAGGGTGAACAG  
ACTCTCAGCTGCCCTGTGAATAAATTCTCTGAAATCGAGCTGACTACTTTCCTGAGGAAGT  
TGAGGAAGCTCTCGCAACAGAAATACAGACAATAA

**IL-5A (contig 23082; Dijkstra *et al.* 2014 [1])**

ATGACCAAAATGATCTGCGTCTACGTACTTCTCTTTAACAGTTTTTTGTTTGTGTTTGGCCG  
AAACACTCACCTTGCAGCAGGCCTCAGATTTATGAAACGATCAACGCCATCAAGAAACA  
TGAACAGGATATAATAAAGAAGCTGCCAGCTGAACTGGAATCACCAATCAACGTTGACG  
ATGAAAATTGCAAGCAGCAAATCAACAGCACATTCTATAAAGGGTTGAAGCCACTGTACG  
AGACGGATTTGAAGCCTATTGCTGAAGAGATACTTTCAAACATGACCAATGACAAAGCCG  
ACGTCCAGGATAAAACAAAGCGACTGCAACCAGAACGTGCAAACAGTGAACGGGGCCAAG  
TTCCTGAAAAGGTTTCTGAACTATCTATTTCAGCAAAATGTCCCGCATGAGCCGCAGGAGA  
CGGAGCCTGAAACAAATTCTGGCTAACTTCCATTAA

**IL-5B (contig 23081 and 23082; Dijkstra *et al.* 2014 [1])**

ATGATCAGCTTCTATATGCTTTTGTGTTGCCAGCTCTTTGTTTACATTGGGCTGCTCTAGAAA  
GCCCTGCCACTATTCCACGATTTGCGAAATGTTAAAAGAATTGAAAAAAGTGGAGAACT  
CGTTCTACCAGGTAACCTGCAAGCACCAATCAATGTTGAAAATAAGCAATGCGTCCAAAC  
GATCATCGGCATATTCAACAGAGGATTCAAGCAACTGAAGAAAGAGCTGCACAAACGAG  
ACCCGACAACGTGCGACATTTTTTGCATAATACTTTCCAACCTGCATTATGAGGAAATGCA  
CCCCAAGTTGCCTTTCCAGAACAAACATAGTTCGTGCACAGCGAGTGACATAAACGTGGA  
AGAAATGAACAGCGCCAAATTTCTGAAAAAATTCAAGAAGCTTCTTACAAGCTTACTACAA  
CACTCTGTTGAACCAGAATAAAGAAAGGAAACGTTGA

**Golden Mahseer**

*Th1-Signature Genes*

**T-bet**

atgggcggcATAGGCAGGAATTTGTATCTCAATATGTTGAATGGAACAGACGCGCAAAGTTTC  
GCCAAAGACGCAGAACTGAACAGCCACCTGCACCGAAACCGCGACTTACCGGACTTCAA  
AATGGGCATCCAAGACACGAGGTTTTACTACCAGGACTCGATTCCAAATGGACAGGACAG

TTTGACGTTGCCGTTCCATGCTGAACACCACCAAAGTGCCGGAGCACAGACGGGGAGGTT  
TTACGCACCGACTCCGCTCGGCAGCTGTCACTTCACCAGCCGGAGCGGGACGGGACATAC  
TTACGTTCCAGCCGGAGCCGACGCGTATTCTTCAGCCAACGGTAAAGACGTGTACCCGAG  
CAGCGCAGACGGCTACCCGACGTCTTTTCAGCACGGGTATCCGCGAGCACCGATGTACTC  
TTTACCTGGTCTACAGGTGTCTGGGAAGACTCAAGTGCTCCTCAACAACCTACCCGCTGTGG  
GCAAAGTTCCACAAGTACCAGACAGAGATGATCATAACGAAACAAGGACGGAGGATGTT  
CCCTTTCTCAGCTTTTAACATCAGCTCACTGGACCCCTCGGCTCATTATAACATATACGTG  
GACGTGGTTCTTGACAGACCAGCATCACTGGAGGTACCAAGGAGGCAAATGGGTCCAGTGC  
GGCAAGGCAGAAGGCAACATGCAAGGAAACAAGGTTTATGTTTACCCAGAATCCCCAAA  
CACTGGAGCACACTGGATGAGGCAAGAAATATCGTTTCGGAAAACCTGAAGCTAACCAACA  
ACAAAGGCAGTTCTAACAATGTAGCACAGATGATAGTGCTGCAGTCGCTCCATAAATACC  
AACCACGTCTTCACATTGTGGAGGTGAAAGAGGATGGAACCGAGGATCCCTTTCTGACCT  
CGAAAACCTCAGACGTTTGTCTTCCCTGAGACTCAGTTCATTGCTGTCACTGCCTACCAGAA  
TGCAGATATCACTCAGCTGAAAATAGATCATAACCCTTTTGCTAAATGTTTCCGGGACAAT  
TATGACACGCTCTATGCACCTCCTGACTCAGACCGCCTTACGCCTTCCCCAACTGAGGGCC  
AGCAGCTCCTCCCAGGCAGTTGTTACCCTCACCAGCCGTACCTGTCTGATCAATACATGAG  
CCCCCTGTCTCAGAGTCGTTTCTACAGCCGCGAGCCGGTCAGCATGACCCAGCAGTGCCC  
CAAAGACCCTGCCGCCAGCCCTCACAGCCGCTTTTACCTGCCCAGCCAGCAGGGGGTGCC  
GCCAAACCGCCTCGACTTCAACGCATACGAGAGCGAATACACTTCCAACAACCTCTACAA  
GCCGTTTCCGATTCAGACATCCCCACATCACCTCTGGGCTACTACTCTGAAAGCCCCTTT  
GCTTCTGGGCGGTTTCTGGCGCCAACGCAGGAGCGTGGAGCTCAGGACGACCCTCACCG  
CAGTACCTTAATCACCCACACCACAGTAAACCCGGGTCTAGTCTTGGCTGGTTCCGAACC  
ATCTCGTCCCCAGCCGCGTCTTCGTCTCCCTCAGCGACAAACTCGCGCTTCCATTCTCTCC  
CGTCGCTCCTGGATCCCCAGCGCCAGCCGCTGCTCCAAGACAAGTCCAAAGAGTCTGGGG  
AGGACACCTGGATGGAAGCCCCCTCGGTAAATCGGTGGACTCAGCTGACTCAGGTTTGT  
TCGAGGGAGGAGAGAGCAAGAAGAGGCGCGTGTGCGCTTACACGTCCAGCACGGAAAAT  
TCCCCTCCCAACCGCAGTGCAGAGGCTTGCGAAAAGGACAATTGCAGTGACGCGGGCTAC  
TACGGCTTCTACACCCACTGA

### **STAT1**

ATGAGTCAGTGGTTGGAGCTTCAACAACCTGGATTCAAAGTTTTTGGAACAGGTCGACCAA  
CTGTACGATGACAGCTTTCCAATGGCCATCCGGCAGTACCTCAGCAGCTGGATAGAAAGC  
CACGACTGGGATCATGTTGCAAATGTGGAGAACGAGTCTCTGGCCACCGTGAGGTTTCAT  
GATCTTTTGACCCAGTTGGATCACCAACACAGTCGCTTCGCGATGGAGAAAGACTTCCTG  
AACCAGCACAACATCCGCAAGATCAAGAGGAACTTGCAGAGCCTCTTCCAAGACGATCC  
GGTTTCCATGGCGATGATCATAAGTAGGAACCTTAGCGAGGAAAGGAAGATTCTGGCCGC  
TGCTCAAGTGTCAGAGAATCGAACCAGAAAGCACCCAAAATGACATGATCGTGGAGAAAC  
ATCGAGAAAATGGATGGAAGGGTGAAAGACATAAAGATGAAAGTACAGGACACAGAGCA  
GACTATCAAAAATCTAGAAGACCAGCAAGACGAATACGACTTCAAGAGCAAAAACCTCTAC  
AGAGCAGAGAGGAACTGAACGGGACCATTTCAAAGGAAGACCTGAACCGTGAGAGACTG  
ACTATCCGTGCCATGTTTATGAACTCAACGACACAAGAATAAATGTGATCAGCCAGATG

TCAGAGGTGTTGAACATTATAGATCCGGTGATCTTTGAGCTCATTTCTACAGAATTAGGCG  
 AATGGAGGCGCCGTCAACAGATGGCTTGCATCGGTGGACTAACCAATGTCTGCTTAGACC  
 AGCTGCAGAACTGGTTTACTTCTCTAGGAGAATCTCTGCTTCAGCTCAGGCAGCAGCTCA  
 AGAAACTTCTGGAGCTGGAGCAGAAATTCACATACGACAGCGATCCAATCACCTCAGCA  
 AAAGCACTCTGGACGACAGGATCATGTCCAACATCAAACTCTCATCACGAACTCATTGG  
 TAGTTGAGCGACAGCCATGCATGCCACCCAACCTACAAAGACCTTTGGTGCTGAAGACGG  
 GTGTTCTGTTCACCCTCAAATTACGGCTGCTCATAAACTTCAGGAATTCAACCACACTGT  
 TCGGGTGAAGGTGCAATTTGACAAGGATATCGTTGAGAAACGGAAAGGGTTTCGCATGTT  
 CAACATCTTGGAACGGCCATGAAGGTGATGAACATGGAGGAATCCAATGGGATGGCAG  
 CAGAATTCCGTCATCTGCAACTGAAAGAGAAGAAAGTTACCGGAAACAGAACAAAGTGAG  
 GGCCCTCTGATCGTCACGGAAGAACTTCACTCCATCACCTTTGAGGCTGAGCTCTGCTGGT  
 CTGGAATGGTCATGAACTTTGAGACTACATCTCTGCCCATAGTCGTGATCTCCAACGTCAG  
 TCAGTACCCAGTGGATGGGCTCCATCATGTGGTACAACATGCTGACCTTTGAGCCAAA  
 GAACCTTTTCGTTCTTCGTGACTCCACCTTCAGCCACGTGGGGACATCTAGCGGAGGTGCTG  
 AGCTGGCAGTTCTCCTCCATCACCAAAAGAGGTCTTAATCAAGAACAGTTAAGCATGCTG  
 GGGACCAAACTCCTTGGTCCTAAAGCGGTGACGGATCCTGAAGCTCAGATTCCTTGAAT  
 AGATTCTGCAAGTCTGGTAATGAGAAGAACTTCACCTTCTGGCTGTGGATTGAAGGAATT  
 TTGGACCTAATAAAGAGACACCTGCTGAGTCTGTGGGATGATGGCTGTATAATGGGCTTT  
 GTGACCAAGGACCGAACTAAAGCTCTGCTACATGACAAAGCTTCCGGGACGTTTCTGTTG  
 CGCTTCAGCGAGAGCAACCGCGATGGAGCCATCACGTTTCAGCTGGGTTGAACACGACGCA  
 AACGAAGAGCCACAGATTCGCTCTGTGGAGCCCTACACGAAGAAGGAACTCTCTGCCGTC  
 TCACTTCCTgatataatacgggactataaggctATGGCCGCCGACAACGTCCCGGAAAACCCTCTGCGCT  
 TCCTATATCCCAGTATACCCAAAGACGACGCCTTCAAAAAATACTACTCCAAACCTACCG  
 ACAAGCAAGAACCAATGGATGTGGATAAGAAGTTACATGAGGGATACATCAGCACCACT  
 CTCATCTCCATCTCTGAAATGGAGCCACAGGACTATAACGACACACTCATGCCAATGTCG  
 CCTGAGGTTTACGGCGAGCTGGAGCGCATGAACCGATATGATACATTAAATTTTGAGCCA  
 TCAGACTTAAGTCTCTCGTAA

#### **STAT4**

ATGAGTCAATGGAAACAAATACAGCAACTGGATATTAAGTTCCTCGAACAGGTGGACTAT  
 TTTTATGATGACAACTTTCCAATGGAGCTGAGACAGGTGCTGGCCAACTGGATTGAAAGC  
 CAGGACTGGGAAACAGCTTCAAACCATGAATCTATGGCTACGGTACTCTTCAATAACTTC  
 CTCATTTCAGCTGGAGAGGCAGTGTTCTCAAGAGCAGAACTTTCTTCACAGACACAACCTA  
 AAGAGAATATTTTCATCAGATACAGGTAAAATACAAGGCGAATCCTCTGCACATGGCCGCT  
 GTCATCTGTAACCTGCCTGAGGGAAGAAAGACGCATCTTATCCACAGCCAGCATGCAGGAG  
 CAGGGACCACTGGAGAAGTCAATGCAAACTCAGCCGCCTTGGAGAAGCAGAAAGTTCT  
 TGACAACAAAGTGGCAGTCATAAGAAGCAGCGTTCAGATGCTGGACCAGGCTGTGAAGT  
 ATCTTGAGGACATGCAGGACGATTTTGACTTTTCGCTACAAAACACTCCAACCTTCGAGATC  
 CAGTTGAGAGAACTCTTTAACCATGAAGCAAGAAGTCACTACACTTCAGGAAATACTGA  
 ACCGCCTGGATTTCAAAGAAAGGAGATTTTGTCAAAGATTGCAGATGTTATAAAGGAAA  
 TTGATACCCTGATCTCCTCCAGCTCAACCCTGAGCTTAAGGAATGGAAACGGAGGCAAC

AGATCGCCTGCATCGGAGGACCGGTTCTGATAGGACTGGACCAGCTCCAGAACTGGTTTA  
CCCTGACAGCCCAGAGTCTTTTCCAGATTAAGACAGCTAGACAACTGGGTGAGCTGA  
TCCTGAAAGTCACTTATGAGAGTGATCCAATCCCTCTCCAGAGACCTCAGATGGAGGATC  
AAGTCAAATGCCTCATCTACCACCTCATTAAGGTCCTTTGTGGTGGAGAAGCAGCCAT  
GCATGCCTACACACCCTCAGAAACCTCTAATCATCAAAACACAGGTGCAGTTTACCACCA  
AGGTCAGATTACTGGTTAAGTTACCTGAGGTGGATTATCAACTCAAAGTCAAGACCACAT  
TTGATAAAGACCTTCCACCAGGCAAAGTGAACAGACAGTTCTTCATCCTTACCAACAACA  
CCAAAGTGATGGATGTTGAGGAGTCGACTGGATGTCTTTCTGTAGAGTTCAGGCATCTGC  
AGCTGAAAGAAAGAAAGTGTCTACTGGAGGAAAAGGGAATGAGGGTCCCCTGTCAGTA  
ACAGAGGAGTTACACTCTCTCAATTTTGAGGCCATGCTGATGTTACAGGGCCTGGATATT  
GATCTTGAGACTTGCTCCCTGCCACTGGTGGTCATCTCCAATGTCAGTCAGCTCCCAGGGG  
GCTGGGCCTCCGTCATGTGGTACAACCTGCTAACTGACGACCCCAAGAACCTTGGGTCTT  
CAGTAACCCCTTGCGGGCAAGCTGGAGTCAACTCTCAGAGGTACTCAGCTGGCAGTTCTC  
AAGTTTTGCAGGCCGAGGACTCAACAAAGAGCAACTTAACATGCTGGGAGATAAACTTCT  
GGGTCAACACGCTTCTTATAATGACTGTCAAGTTTCTTGGTCCAAGTTCTGGAAGGAAAA  
CATTCTGGCAAATCATTAGTTTTTGGCTGTGGCTGGACTCGATCCTGGACCTTATCAAG  
AAGCATTTACTTCCTGTTTGGATTGATGGCTACATAATGGGATTTGTGAGTAAAGAGATG  
GAACGTGCCTTACTGAAGGAGAAGGAGCCAGGGACATTCCTGCTACGCTTTAGTGAAAGT  
CACCTTGGAGGAATCACCTTCACCTGGGTGAACAGGATGAAAATGGAGACCCAAAGTTC  
ATCTCTGTAGAGCCGTACACGAAAAACCGTCTCAACGCCTTGCCCATTGCTGATATAATA  
CGGGACTATAAGGTCATTGCAGATGGTGTGTCCCAGAGAATCCTCTAAAGTTCCTTTATC  
CTGACATCCCGAAGGATGAGGCTTTTGGGAAACATTACAACAGCCAGCAAAACAAAGTTT  
GTCCTTACATTCAAACACAGTTAGTTCCAATTTCCCATCGGAATGGTCCTGTCCAAAATGC  
ATGTTCTCTCCTGAACCCCCCATGTCTCCTGGAATGTTTGAAATTATCACCCAGCACCTC  
AGCCCTTTGAGTTTGAAAGCGCTATGAGTTCACCCTAG

### **IFN $\gamma$**

ATGATTGCGCAACACACGATGGCCTTTTTCTGGGGAGTATGTTTGTGACTTTAGGATGGA  
TGACATATGGCGAGGCCAGCGTCCCTGAGAACCTGGACAAGAGCATCGACGAGCTTAAA  
GTGTACTATATAAAAGATGACAGAGAGCTACACAATGCACATCCTGTCTTCTACGGGTC  
CTAAAAGACATAAAGGTGAATCTTGAGGAACCTGAGCAGAATCTTTTGATGAGTATCATA  
ATGGATACATACAGCAGGATATTCCTCGCATGGAGAAGGATAGTCAGGATGAAGCTAC  
AAAAGAAAAACTGGAACATGTTCAAGAGCATTTGAAAAAACTGCAAGAAAACTACTTCC  
CAGGCAAAAGTGACAGAGCTCAAGACGTATGCAGAAACCCTATGGGCGATCAAGGAAGAT  
GACCCAGTCGTCCAGCGCAAAGCATTGTTTCGAGCTGAAGCGTGTCTACAGAGAAGCAACA  
CAGCTGAGAAACCTGAAGAACAAAGAGCGCAGGAGACGACAAGCCAAAATCACAAAAA  
GCAAAAGTCTTAATAGATCTTGA

*T<sub>H</sub>17-Signature Genes***IL-17A/F1**

ATGTCATCAGCGCTAAACATCCAGTTCCTCATGGTGGCTTGTATGATGGGGCTTGTTTTAA  
TATCATTTGTAGCTGAGGGGGCACCTTCAAAACATCTTCCGAAGAAAGGAAACCACAGGT  
CATCAGAAGAATCGGATCCATCATCTTCATCATAACGGTTGATCTTGGATCATGAGTTCAA  
ATCCTCGGCCAGCTCGATCCACCCAATCAACAACGACTCCATCTCTCCATGGACCTACAC  
GTTTACACATGATGACAGCCTGTACCCTTCTAGCATCGCAGAGGGCGAAATGTTTGCTGACT  
GGATGTTTGCTAGAAGGCGCTGAGAATTTCCATTCCAAACCGATTTACACCCAAATCATG  
GTCTTGAGGAAAATTTCGAGGAGAAAAGCAGAACTACTCCTTAAACTTGAGTACAAAAC  
CATCGCAGTGGGATGCACCTGCGTTCGTCCATATGTACAACAAGCTTAA

**IL-17A/F2**

ATGTTTCTGAGCTTCTTCAATGCTAAAAACATGGTTTTGCTGAGCTGTGCGCTGGCGAACA  
TCACATTTGCCAAACAAGGGCAGAAAAAATATGTGACACTAGTTTGAGGATTGACTTTC  
AAGTCCATCTGGATGCAGACGCAGAGGGAAATGGCAACATCCACACCCGCTCACTATCTT  
CATGGACCTGGGTACCAAAGTTTTCCACACACAGAATACCACAGGTCATCTTTGAAGCCC  
AATGCAATTCAGAATATTGCACCCTTTCCAATGGCGTGGATACGAGACTGAACTCATTGC  
CCATTTATCAGGAGATCCTGGTGCTGAAACAGGACACGGAGGACAGGAAGTGTTTTAGGG  
CGACTTTTGAGAGAGTAATAGTGGGCTGTACGTGTGTGTGGGCCAAAACCTACTAA

**IL-17A/F3**

ATGCAGCTCTCATTGGTTTTTCAGAGCTGTGCTGCTGCTTTACCTGCTTGCCCTGTTACTAAA  
TGCGCTTCTTCTGAGAAAAAGTCTATAAGGCGGTTTATCAGCGGCATCTTCAGATGTGAT  
TCTGAGGGATGCAATAGCTTTTGCCAAAAGAAAGAAAAGTGGGTCATCTTGGATCCATCTC  
TGAACCTCTCAATGAATGTTCCCCCATCTCCAAGCAGATCTTTGTCACCATGGACATACGA  
AGAATCCTATGACGATTCACGATTCCCATCCAAAATCTCTGAGGCAAAATGTGAAAAAACA  
GGCTGTTTAACCAAAGATGGTGAGGAAGACTTGGGACTGGAATCTAAACCCATCTACTACC  
AGATCAACGTCTTGAAGAGAGTGAAGGAAAAAAATGCTATGCACTACACCTTCAGCTGG  
AGACTAAAGTAATTAGTTTGGGCTGTACATGCGTTCTACCCATCGTTGTGCCTCAGAATTAG

**IL-21**

ATGAAGGCGTCTGTGTGTTTTGTGTTTGCAGTGGTTTGTGATCGCAGCGCAGGCAGAG  
GAGTCGCCAAAGATCCTCACGCTCAGTAAAGTTATGAATGAACTCAACAAGATCAACCGG  
GGAATGAAGATAACGGACAAAAGCACAAGTTTGAACCTACCCACCGTCAACGATCTGAA  
GGACTTCTGTATTGCATCTGCTCTGGAATGTTTTCGGTCCCAAGTGATTCACCTGTCAGTC  
ACTGATGCCAAACTAAAGCGGTCACAGAAGATCATCTCACATGAGCTTCGCAAATCAGTC  
ATTGTGAACAGTGTGTCCAGTTGCAAACCTGAAGAGATACAGGCAGCTCAGTGCAAATCA  
TGTGGCTCGTACAAAAGGTTGACAGCCGAATGTTTCGTAAAGAATTTTCAAACCTTCTG  
CAAAAGATCTATGCCAGTCAAGCATAG

**IL-22**

ATGAAGTTCCTAACTCTGCTTGCTGTGATGTTCTGCTGCTGCTTTCTGCGCGGCCAGGCCGA  
TGCACCTCTCTCGCCCGCGCCCCAAGCCTTTAGACAGCTCCGTCACCTGGAACGACCTCTT  
CACGATGACGGAACATGCACAGAAGGAAGATACAGACCACGAAACAAGACTGCTCCCAG  
TGATCTCCGAGGTTATGCTGAAAGAGGAGAATACTTGTGCGTCAATGCCATGATCCTGA  
ATTACTATCTAAAACACATCTTGCACGCAGATGAGCATGTTGATAAGAAATACCCACATA  
TTCGTTTTGTGAGGTCTGACCTGCAGAGGATCGCAAACGTTCTGAAGCCACACTGTGAAA  
GCGTCGACTTTGCAGACCATGTGCATGTTAAGGAATTCGAGAAGAACTATAAACTGCCA  
GTGAACATGAATATGAGAAAACCTCGTAACAAAGCAGTTGGAGAGACGATTATTCTCTTCC  
ACTACCTCTTTGAATCCTGCAGTGCAAGAGTATGA

*T<sub>reg</sub>-Signature Genes***FoxP3**

ATGCTTCAAAATGGTGCTGGAACACACAGAGGTGGAGATAACTGGAGTAGTCACCAAAA  
TCAGTACCAAGAGGAAGACAGTTCTACCTTTTCCAGCATAACAGACCCAGGCCAGAGGAAG  
CAGTTCATCTCTGATCTCAGCCAAACCCATGGCTACCAAGGTATCTGTTGGTATCTTGGAC  
TGTGATTTTCAAGAGGTTCTGGCTCATCTCACATTCAAAATTCCTCTCTACAACAGCAGACTG  
CCAGTGACAATAACAAGCAAACATTTCTTTCAGCTCAGACCATCAGTACTACGCAAAGGCA  
ACCAGCCGTTCCCACAAGCTTGTGGTGTTCAGGACTGGGTTGTGGACACTGTGTGTGAAGA  
TAGAACCTGACAGTGACCTGTCAGAGCCTATGCCACTTTACACCAGCCAAACTGAAAGCA  
GACTCAGTGCTCCATGTCAAGTCCTAAGCCTGGCAGCACAGAGCATACTGGGAAGCATG  
CATAAGTGTTCTAGGTGGCTTTCTATGCGTTAAAGGACAATGCGGATGGCCAGGCTGTG  
ACAAAGTCTTTGAAGTCTATACTCATTTTCTGAAACATCTAAACCGAGACCACCATGCTCC  
TGGGGACAGAGGTATAGCCCAGTTGAGGATGCAGAAAGACAAAGTACAATACATGGAGA  
ATCAGTTGACTGCAGAGAGACAGAAACTGCAGGCTATGCAGCTACACCTGTTTGATGTCA  
AATCTACCTGTGAGGATGGTAACACTCTGGAGAAGTCGGGACATCTGTCAGAACTCCTGC  
AACCTGCAGCATATCAAAACGCAAATGGTGTCTGTGACAGTGACAGAGCGGCAGCTGAA  
GCGCTAACACAAGGATACAGGCAGATCTCTACCTCACAAGTTATTCCAGGTCATCCTGCA  
CAATATGCTTCGCTAATACGACAGGCAATTTTGGAGTCTCCTGAGAAGCAGCTAACACTA  
AATGAAATCTACAACCTGGTTCACCTCGAACATTTGCGTATTTTCAGACGCAATGCAGCAACC  
TGGAAGAATGCAGTTCGCCACAACCTCAGTCTTCATAAGTGCTTTGTGCGCGTTGAAGGA  
AGGAAAGGTTCTGTTTGGACCGTGGATGAAGAGGAATTTCTGAGAAGAAAAGGACAAAA  
GTTTCACAGGGATCAGGATATGGGCTGGATGGCGCCTTTTCACGTGTTTCCTGTGACTCCA  
CAAGGTGAAACTTATCAGATACGAGGCCCAAATGGACTCTCATGA

**IL-10**

ATGGTTTTCACTGGAGTCATCCTTTCTGCTCTGACCATGCTTCTGCTTTCTGACAGTGCTCA  
GTGCAGAAGAGTCGACTGCAAGTCTGACTGTTGCTCATTTGTGGAGGGCTTTCTGTGAG  
ACTGAAGGAGCTCCGTTCTGCATACAGAGAAATACAGAGGTTTTATGAGTCCAATGATGA

CTTAGAACCGTTACTGAACGAAAACGTGCAACACAACATCAATAGTCCTTATGGATGTCA  
TGTCATGAACGAGATCCTGCGCTTCTACTTGGACACCATTCTGCCAACAGCTGTCCGGAA  
GGACCACTTGCACTCCAAAACACCAATTGACTCCATTGGAAATATATTTTCAGGATCTCAA  
GCGGGATATACTCAAATGTAGGAATTACTTTTCTTGCCAGAATCCCTTTGAGTTCGCCAGC  
ATAAAGAACTCGTATGAAAAGATGAAGGAAAAGGGCGTTTCTAAAGCCATGGGAGAGCT  
TGATATGTTCTTTAAGTACATCGAGCAGTATTTGGCATCAAAGAGAGTCAAGCACTAA

### **TGFβ1**

ATGAGGTTGGTTTGCTTGGTACTGACGGCCCTGTGCATGGTGGCTGGAACAGGAGGTATG  
TCCACGTGCAAACTCTGGACCTGGAGGTGGTGAAGAAGAAACGGATAGAGGCCATCCG  
CGGTCAGATCCTCAGCAAACTGCGCATGGCCAAGGAGCCCGAATCGGAGAAAGACGATG  
ATGGACAGAAGATCCCAGATATCATGCTTTCTCTGTACAATAGCAGTGTTGAACTGAGTG  
AAGAAATGAAGATGAAGCCCGTTTCTGTGCAGGCTGAAGATGAAGATTACTTTGGCAAGG  
AGGTGCACAAGTTCGTCATCCGGCAAGCTCAGAATGGCACGAAGTATCAAATGACTTTTA  
ACGTGTCAGAGATGAAGCAGAGTATTCCAGACCAACGGCTGCTGTCTCAAGCCGAGTTAC  
GGCTTCGGATTAAGAATCCTACAATGGACCAGGAGCAGAGGCTGGAGCTGTATCGTGGA  
ACAGGCGATCAGGCTCGATATCTGGGCACCCGCTTTGTCTCCAAGGACTTGTCCAATCGTT  
GGCTCTCGTTTGACGTGAAACAGACGATGATAGAATGGCTGCAGGGTTCAGAGGAGGAA  
GAAAGTTTAGAGCTGAGGTTATACTGTGGCTGTAAGACAGACCAGCAGAGAACTGATAA  
ATTCCTCTTCAGTATATCAGGACTAGACAAGCAGAGAGGTGACACTGCCGGTCTGGCAGA  
GATGATGGCGAAGCCTTATATTCTGGCTTTATCTTTGCCTTCGAATGGCAACTCCCTCGCA  
TCCGCTCGCAGGAAACGAGCTGTTGGCACTGATGAAACTTGTGATGAAAAAACTGAGACC  
TGCTGTATGCGGAAGCTTTACATTGACTTTCGGAAAGATCTGGGTTGGAAGTGGATCCAC  
AAGCCGAAGGGATACTTTGCCAACTACTGCATGGGCTCCTGTACCTACATCTGGAACGCT  
GAGAACAAATACTCTCAGATATTAGCCTTGTACAAACACCACAACCCAGGTGCATCTGCT  
AAGCCATGCTGTGTACCTGCAGTCCTAGCCCCTCTGCCGATTCTGTACTATGTGGGCAGAC  
AACACAAGGTGGAGCAGATGACCAACATGGTGGTGAGGAGCTGCAAGTGCAGATAG

### *TH2-Signature Genes*

### **GATA3**

ATGGAAGTAAGTCCGGAGCAGCCCCGTTGGATGACCCACCATCACTCGGTCATTAACGGC  
CAGCATCCCGAGACACACCACCCAGGACTGGGACACTCCTACATGGACCCGTCGCAGTAT  
CCCCTCGCGGAAGATGTGGATGTATTGTTTAATATCGACGGACAGAGCAACCACCCGTAC  
TACGGGAACTCGGTTTCGGGCTGTGCAGAGGTACCCGCCACCTCACGGTACTCAGGTGTGT  
CGCCCATCATTGCTGCACGGCTCTCTTCCTTGGCTCGATGGAAGTAAATCTATCGGCCCTC  
ACCACAGTACCTCCCCCTGGAACCTCGGGCCTTTCCCCAAGACTTCCCTGCATCACAGTTC  
CCCTGGGCCTCTGTCCGTCTACCCCCCAGCCTCCTCCTCCTCGCAGGCCGCTGGCCACTCC  
AGCCACACCTCTTCACCTTTCCCCCCTCCACCCAAAGATGTGTCCCCTGACCCCGCAA  
TTTCCACGTCAGGCTCGGGCTCATCCGTAAGGCAGGAGGACAAAGAGTGCATTAAGTACC  
AGGTGTCTCTGGCCGAAAGCATGAAGCTGGATTCGGCTCATAGTCGGAGCATGGCCTCTA

TCGGACCGGGCGCGTCCTCCGCGCACCACCCCATCGCCACTTACCCATCCTATGTGTCCGA  
TTACGGGCGGGGCTCTTCCCACCAAGTAGCCTGATAGGTGGGTCTTCTAGTTATGGT  
TCCAAAACGAGACCAAAAACAAGGTCCTGTTTCAGAGGGTAGAGAATGTGTAACTGCGG  
GGCCACCTCGACTCCTCTGTGGCGGAGGGATGGCACCGGTCCTATTTGTGTAAACGCCTG  
CGGACTGTACCACAAGATGAACGGACAGAACCGACCCCTCATCAAGCCCAAGCGGAGGC  
TGTCTGCTGCCAGACGAGCAGGGACCTCATGCGCAAACCTGTCAAACGACCACGACGACAC  
TGTGGCGGAGAAATGCGAACGGCGATCCCGTCTGCAATGCCTGCGGCCTCTATTACAAAT  
TACACAATATCAACCGACCACTCACCATGAAGAAAGAGGGCATCCAGACCCGGAACAGG  
AAGATGTCCAGCAAGTCCAAGAAGAGCAAAAAGTCCCATGATAGCATGGAGGATTTCTC  
CAAAAGCTTGATGGAAAAGAACAGTTCCTTCAGCCCAGCCGCCCTGTGCGGTCACATGAC  
CTCGTTCCCTCCCTTCTCGCACTCTGGCCACATGTTGACCACGCCACCCCCATGCACCCC  
TCCTCCAGCTTGCCCTTCGCCCCTCACCACCCTTCCAGTATGGTGACGGCGATGGGCTAG

### **STAT6**

ATGGCGCTGTGGGCGCAAATGACCCCGCAGTTACAGTACCTGCCAACTCAGACGCTGAAT  
GAACTCTACCCAGACACATTCCTCTGGACGTCAGGCACTATCTGGCCAGCTGGATAGAG  
GAACAGAGATGGGAGAACTTTGATGTGGACAACATGGAGCAGGAGCCTCAGGCCCCGAAG  
GCTGTTGGATCAGATGGTGCATTTGCTGCAGGAGGTGGCCCAACACAACCCTAACATGGT  
GGAGAGGGTCAAACATAACATATCAGCCGGAACCTTGAGTGTGTTCCAGTCACAACCCAT  
GCAACTTGTGAGGACAGTTCGAGATATTCTAAGGAAAGAAAGGCACTTATTAGCACAGGC  
ACAGGGCATGCACCCTAACTTCCCACCCTTCCAGCAAATTCCTCAGGGTCCTCCATCTACC  
AATGGCACCCCAACCTGCAAGGGAGGATGGGAAGTCTGATGTGGACAATCTGGTGCTC  
AAAGTTTTGGAAATTCAGAACTGCCGCCAAACACTTCATCAGCTTCAAGAGGATTTGAAC  
TGGGAAAAGCAGGAAATGGAGTCAATTCAAAGTCAAATGAGTTGGATCCACAGCATTC  
TGATCAAGTCGCTAGACAGACTCGCATAACAGCAGCTTGAGTACAACCTATTAGTCTGTGC  
AAAGAAGCGCGTGCAGCTCCTTCACGAGGCCGTGTGCGCTCTGGAGCAGTGCCAGTCCAG  
CCTTATTCTCAGAATTAAGTCCTGGAGGTGGGAACAGCACCGAGCAACCATTGGCGTGCA  
CTTCGATGACAACCTTGGCCCTCTTCAGACATGGTGTGAGCAGTTGCTTGGAGTAAATGGT  
AACCTGAGGCAGGAGCTCATGTTGGTGACGAGAGACCACGGAGGGGCTGAGCAGTTTCA  
CACGTTGCTGGAAAGCCTGGCACATCTGCTCCAGACTCTCATAACAGAGTTCATTGGTGGT  
AGATAAGCAGCCTCCCCAGGTCATCAAAACCCAGTCCAAGTTTTCCACCACTGTACGCTA  
TCTGCTGGGAGAGAAGATGGCCCCTGGGAAACCTGTCCTGTTGAAGGCTCAGATTATTAC  
TGAGGCTCAAGCGAGACACCTGGGTCAACAAGGTGTCGTACCCAATGAAAATGTAGGAG  
AACTTATCAACAGCACGGCCATCTTAGAGCACAACTTCAAGCAAGAGCACATGTGCTA  
CCTTTAGAAACATGTCCATAAGGAAGATCAAACGAGCTGACAGGAAGGGCTCTGAGTCA  
GTGACGGAGGAAAAGTTCGCTTTGTTGTTTACCACAGAAATGACCATCACTGGCTGTGAG  
AGCCCTTATAGCATTCAGGCAATCTCTCTTCCCTGTGGTTGTAATTGTACATGGTAGTCAGG  
AAATCAATGCTATGGCGACAGTACTGTGGGATAATGCTTTCTCTGAGCCAGGTCGAGTGC  
CATTTGTCGTTCCGGAGCGTGTGCCGTGGAAGCAGATGTGCGAAGCTCTTAGCAGTAAGT  
TCATGTCTGAAGTGCAGACGCAGCGGTGCTTGGACAGATACAACCTTCACTTTCTCGCCC  
AGAAGATCTTCGACCAACCAGACATCTCTGAAGATTTAGCAATATGCTAGTGTCTGGG

CTCAGTTCAACAAGGAAGTTCTGCCTGGTCGAACTTCACCTTCTGGCAGTGGTTTGAAG  
GGGTGCTGGACCTACCAAGAAGTGTCTGAGAGACTATTGGAGTGAAGGACTGATCTTTG  
GCTTCATTGGAAAACAGCATCTCCATGTCATCCTGCAAAACAAACCCAACGGCACCTTTC  
TTTTGCGCTTTAGTGACTCAGAGATTGGTGGCATCACCATCGCCTACGTGGGTCCCAGTGA  
TAATGGCGGCAGGAAAATCCAGAATATCCAGCCCTTCACCAAGAAGGATCTGGACTCAGC  
TGGCCTTGGTGACCGCATACGGGACATTAAGTGCATCACTCATGTGTATCCAGACTTACCA  
AAGAATGAAGTATTTAAGAAATTCTTTACAGTGCCTTCTCCCCCTAATCCTGATGGATACC  
TGCCATTCAAACATAACAACAGTAGTCAACCCAGGAGACCAGTGTTCTCAACCACCAGCA  
TACCACCTGACACTCCTATGGATATGTACAGCCAATCTATGAGCAATGTCTATGGGTCAA  
ACATGTGCGTATTTGATTAA

#### **IL-4/13A**

ATGATGAAGACTATACTTCTGCTCGCTTTTGCTGTATTCGTCTACAGTGTTCTACGGAAC  
TCAGCGTCCCTGAAAAACACAGTGATAAGACTTTATTGGGAGAGCTTGTTTTTGAGCTGG  
AAAAAGCAGTGAAAATTTTCTCAAAGGAGACTGAGGCAAACCCAGTCTCCCTGACAGAA  
GTGCAAATGAATGGCTGTAAGCGTGAGGTTTTCTGCCAGGCTGAGCAAGAACTGATAAAG  
AAGGTTTCTGGGCTGTCTGGTGCCAGATTTGACCGTTTTCTGATTGACATGAAACTAATGA  
GGAATTTAAACACGTATAACAAGCACCATGTGAAAACCTGCAAACCCGCTGATGAAGGC  
CAAGATGAAATCCTTCTGCATGATTTCTTGAAAAATTTCTTGACATGTGTTAAGAGTGCAT  
ATAGCCAAGCCAAGTAA

#### **IL-4/13B**

ATGAGAACTTTAATGCTCTTGGTGCTGACAATTGTAGCTGTTACTGGATCAAGACACCCTA  
ACGCGGGAGAAATTCTCCTAGTGGAGATCATGAAGGACGTGGACGTGATCCTAAACCAA  
AGTTCAAAGACGAATCTCAGCGATTTTGTAAGACGTATTTCCACAAGCGGGCTGCTCG  
GAGAAACACCTTTGCCAAGCAGCAATGGTTATGATGAACACAAATCTACACTTCTCCAAG  
CTACACAGACAACCTGCTTGCCTACATTAATTATTCAGGGCACCATCAGTGCAGCGTTCCA  
GCTTCAGAGGAACACAGAATGCGTGTTTTTCTGACAAAAATCAAAGAATGCAGCCAAGA  
ACAATACTCTAAACTCTTAAAGAATAAAAGACACGTGAAATGA

#### **IL-5fam?A**

ATGAAACTGCTAAGTCTTCTCGTCGCACTGCTAGCTCTCAGCTATGCAAACCTCAGACATGA  
CCGTTAAACCTTTTCTGAACTCCTGCACAGGCTAGAAAGACTTGAGAAGCATCAGTTCTG  
ATGCACTCAGTATATCAAAACCGATCCAAACACCTCGAGATATAAAGAATGCATGTGAGT  
GCAAGGACTTATTTGCAGAATGCCTGAAGCACTTTCTGAAGTCAGTTACAGGGGTACCCA  
AAATCCAGAGGGCCAACATTTTGGACAACCTGAAGCCTTTCCTCATCCTGGAGTCAACG  
CCAATGACAAGTGTAACCTCACAACGCATAACCTGACAAGATTGACATCAGAAAATTTTA  
AGAAGTTGATTCAGGATAACATTGAATTCATCCAAACTGGAATGCACACTGCAAACCAA  
ATAATGCACGTCACAAAAGTAACTAA

**IL-5fam?B**

ATGAAACTGCTAAGTCTTCTCGTCACACTTCTTGCTCTTAGCTATGCGAACTCGAACACCG  
CTACGGTCTTCTCTGAACTGCTGCACAGTCTTGAAAACTTGAGAAGCATCAGTTCAATGC  
ACTCAATAAATCAGTACGAATCCAAACACCTCAAGAAGTAAAGAACGCATGTGATTGTGA  
GGACTCAATTGCAGGACACCTGAGGCACTTTCTGCGGTCATTTAAAATTGTAATACCCAG  
AGCCAGTTAGCCAACATTTTGTGACAACCTGGATTACTTCAATCTTAGAATCGAGCCGAAT  
GACAACTGTAGCTTCAAAACGCATAACCTGACCAGTCTGACAACAGACAATTTCAAGAAG  
TCCATTCAGAATTACACTGAGTTCATCCAAAACCTGGAATGCACACTGCAAATAA

**Northern Pike***TH1-Signature Genes***T-bet (XM\_010866213)**

ATGGGCGGCATAGGTGGCAATCTTTACCTCAGTATGTTGAATGGGAATGATACGCAAACCT  
TTCGAAAAGACATCGATATCCACAATCCCATTCAACGCAGCAAGGATTTAGCGGAGTTT  
AAAATGGGAATTCAGGACACCAGGTTCTATTACCAAGACTCAATTCAAAAATGGACAAGAC  
GCGTTGGCACTGCCGTACCACGCAGATCAAACCTGTGGCCGGATTTCGGAGCGCAACCCGGG  
AGGTTTTACTCAACTCCCCTAAATAGCTGCCATTTTCAGCAGTGTGAGGTCGCCGACTCGAA  
CTGGGACGGGACAGAATTATTTAACACCTGGAGAAGAAGGTTTCTCAACAACCTAGCAAA  
GAAGCTTACTGTGGCTCTCCGGAGAGTTATTCCACGCCCTTTCAACACGGGTACCTTCGCG  
CGCAACTCTACCCTTTACCTGGCCTACAGGTGTGCGGTAAAACGCAGGCAATCCTCAACA  
ACTATCCTCTGTGGGCAAAGTTCCACAAATACCAAACCGAAATGATCATAACGAAACAGG  
GGCGGAGGATGTTCCCCTTTCTGAGTTTCAACATCAGTGTCTAGACCCGTCGGTACACTA  
CAATGTATATGTGGATGTGGTCCTGGCCGACCAGCACCACTGGAGGTACCAGGGAGGGA  
AGTGGGTCCAGTGTGGTAAAGCGGAAGGCAACATGCCAGGGAACAGGACGTACATGCAC  
CCTGACTCCCCCAACACAGGGGCCCATTGGATGAGGCAGGAGGTTTCGTTTCGGCAAGCTG  
AAGCTCACCAACAACAAGGGCAGCTCCAACAACGTGGCACAGATGATAGTGCTGCAGTC  
GCTTCATAAGTACCAGCCACGTCTCCACATTGTGGAGGTGAAGGAGGATGGTTCTGAAGA  
CCCGTTCCCTCACTGCCAAGGCCCAGACCTTTGTCTTCCCAGAGACCCAGTTCATCGCTGTC  
ACAGCCTATCAGAACGCAGACATCACTCAGCTGAAAATAGACCACAACCCTTTTGCAAAA  
GGTTTCCGGGACAATTATGACACGCTGTACGCACAGACTGACTCAGACCGCCTCACCCCC  
TCGCCTTCCGATGGCCAGCAGCTCCTGGCGGGGCCCTGCTACACCCAGGGGTACCTGACG  
GATCAGTACATGAACTCCCTGCCCCAGGGCCGCTTCTACAGCCGAGAGCACATGGCCGCC  
ATGAGTCAGCCGCCCAAAGACCCCTCAGCCACCCCCACGGCCGCTGGTACCTCCCCCCC  
CAGCAGGGTGTGCGCTCCAACCGACTGGAGTTCAGCTCTTACGACGGCGACTTCTCCAGT  
CCCGGCTTCTACAAGCCCTTCCCGCTGCAGTCGTCAGCCCACCACGCGCTGGGCTACTAC  
GGGGACAGCCCCCTTTGCCTCAGCCAGCGCCGGGCCCCCGTCGACAGGCTGGAACACCGCC  
CGGCCCACCCCCCAGTACCTCAACCACCCCCACCCCGGTAAAGCCGGTCACGGCCTGGGC  
TGGTTCAGGCCGGTGTCTCCGCCTCGTCCTGCTCCACCTCCCCGGGTACCCCCAGACTCC  
ACGCCCCGTCCCTCCTGGAGCCGCTGCGCCCCGCGCCCCACCACCCGACAAGCCCAAGG

ACGTGGGGGCGGAGGACCCCTGGCTGGAACCCCCCTCGGTTAAATCGGTGGACTCGGCCC  
ACTCTGGCCTGTATGAGGGCGTGGCGGAGAGCAAGAAGCGACGGGTGTCGCCGTACGCC  
TCCAGCACGGAGAACTCGCCGCCACGCGCGGCACAGAGGTGTGCGAGAAAGACGGTGG  
CGGTGACGCTGGCTACTACGGCTTTTACACCCACTGA

**STAT1 (XM\_010866213)**

ATGGCCCAGTGGTGCCAGCTGCAACAACCTGGATTCTAAATACCTGGAGCAGGTTGATCAG  
CTGTATGATGACTCCTTCCCAATGGACATCAGGCAGTACCTGAGCAAGTGGATTGAGAGC  
ATCGATTGGGAAAATGTGGCTGTCCAGGACTCCTTGTCAACAGTACGTTTCCATGACCTCC  
TAGCTCAGCTGGATGACCAGCACAGCCGCTTTGCCCTGGAAAACAACCTTTCTGCTGCAAC  
ACAACATCCGCAAGATCAAGAGAAACCTCCAGGACCGCTTTCAAGAGGACCCCATTCACA  
TGGCCATGATCATTGCCAGAAACCTGAAGGAAGAGCAAAGGATTCTGGCTGTTGCCAGAA  
GCATACAGGCCGACTTGGAGAACACACAGACGAGCATGGTCCTGGAGAAACAGAAGCTG  
GATAATAAAGTTAAAGTGATGAAAAACGAAGTTCAGGTCGTAGATCATAACATAAAGCTT  
CTTGAAGAACTTCAAGACGAGCATGACTTTAGAGTGAATAGTCTTAAGAACAGAGAACAT  
GAAAATAATGGGCTGACCCCAAAACAGCTGGAACATGAGAAGATGATTATTCTTGAAAT  
GTGTTTAAAGCTGAAGATTAATAGAGAGGAAGTGGTGTCTCAGTTAGCAGATGTGCTTAA  
CATGTCTGAGTCAATCCAGTCAGACCTGATCTCAGAGGAACTACCTGAGTGGAAGAAAAG  
GCAACAGAGCTCCTGTATTGGAGGGCCACCCAATGCCTGTCTGGACCAATTACAGAAGCTG  
GTTCACTGTGGTGGCTGAGAACCTGCAGCAAGTGAGGCAGCAGCTGAAGAACTCCAAG  
AACTAGAGCAGAAGTATACATACGAGAATGATCCAATTGGACTGAAGAAAAGCTTCCTG  
GAGGGGCGGGCCCTCACACTGTTCCGGAACCTTCTAGAGCATTCTTGGTGGTAGAGAGA  
CAGCCTTGTATGCCCACACACCCACAGAGACCCTTGGTGCTGAAGACACAGGTTTCAGTTC  
ACTGTTAAGCTCCGATTCTCGTGAAGCTCCAGGAATTCAACTATCAACTCAAAGTCAAA  
GCTTCGTTTGACAAAGATGTTACAGAAAAAAAAGGTTTTTCGTAAATTCAACTTGTTGGGT  
ACCAACACAAAGGTTATGAATATGGAAGAGTCCAATGGAAGTCTGGCTGCAGAGTTTCGC  
CATTTGCAACTGAAAGAACAGAAAGTGGCCGGAACAGGACAAATGAGGGGCCTCTTAT  
TGTGACTGAGGAGTTGCACACCCTCTGCTTTGAGTCTGAGCTCAACCAGTCCGGCCTGGA  
CATCAAGCTAGAGACCATCTCCCTGCCGGTCGTGGTTATCTCCAACGTCAGCCAGCTGCCC  
AGTGGCTGGGCCTCTATTCTGTGGTACAACATGCTGACCACTGAGCCCAAGAATTTGAAG  
TTCTTCCTTAGTCTCTCTGCTGCCACCTGGGGTCAGTTGTCTGAGGTTCTGAGCTGGCAGT  
TCTCCTCTGTCACTAAGAGGGGACTCAACGAGGAACAGCTGGGAATGCTGGCTGACAAAC  
TGCTAGGCCATAAAGCGCAGAGGAATTCAGAGGGCCTTATCCCCTGGACCAAGTTCTGTA  
AGAGTCTCACCGAGAAGAGCTTTCCCTTCTGGCTGTGGATCGAAGCCATTCTGGACCTTAT  
TAAGAGACACCTGCTTTCCCTTTGGAATGATGGTTGCATCCTGGGCTTTGTGAGTAAGGAG  
AGGGAGAAGGCCATGTTGACCGGGAGGTGTCCAGGCACGTTCTCTGCTGCGTTTCAGTGAG  
AGCAGCAGAGAGGGTGCATCACATTACCTGGGTGGAGCACGACCTATATGGTGATTAT  
CTTGACAAGCCCGTGTTCCATGCGGTGGAACCATAACCAAAAAGGAGCTGACCGCCGTC  
TCTCTGCCTGACATAATCCGCACCTACAAGGTCATGGCAGCTGAGAACATCCCGGAGAAC  
CCGCTCCGGTTCTCTACCCGGACATCCCCAAGGACAAGGCTTTTCGGGAAGTACTACGCC  
AGGCCACAGAGGTGTCAGAACCCATGGACGTGGAGAGTCCAGCCAGCCGAGGATACAT

GAAGACAGAACTCATATCAGTGTGAGAAGTTCACCCATCTAGACTGCAAGACAACATGAT  
GCCGATGTACCAGATGTGTTTGGTGAGCTGACGAGGAGTGTTGGTCCAGTGTTGGACCA  
GTGTTGGAATCAAAGCCCTAAGGATTTGGATGCTGTGGCGTGTGATTTGCTGATTTGATG  
CCTGAAGACTTTCAGATGACTGCTGACTTGGACTCCCCTGA

**STAT4 (XM\_010890773)**

ATGAGCCAATGGAAACAAATTCAACAGCTCGAGATCAAATACCTAGAGCAGGTGGACTA  
CCTTTACGATGACAACTTCCCTATGGACATTCGGCAGGTGCTCTCCAGCTGGATTGAGAGT  
CAAGACTGGGATACTGCCGCAAACCATGAGTCCATGGCAACAGTTCTCCTCAACAATCTC  
CTATCTCAATTGGAAAGGCAATGTTCTCAGGAACAGAACTTCCTGCAAAGACACAACCTG  
AAGATCATCAACCAGCAGTTACAGCTGAAGTACAAAGCCAGTCCTCTGCACATGGCCGGG  
GTCATCGCCACCTGTCTCAGGGAGGAGCGTCGTATTATCTCTACTGCCAGCATTGAGGAA  
CAGGGCCCATTGGAGAAGTCCATGCAGAATCCAGTGGCCTTTGAGAGACAAAAGAATTTG  
GATAACAGGGTGGCTGTGATCAGGAGTAGAGTGCAGATGATGGACCAGGCGGTAAACA  
TCTGGAGGACATGCAAGACGACTTTGACTTCCGCTACAAAACCTCTTCAGTCTCGTGATCCG  
GCAGACAGGAACACCGACGTGATGAAACAGGAAGTGACTCGACTGCAGGAGATGCTCAA  
CAACCTGGACTTTAAAAGGAAGGACAGTCTGTCTAAGATGAGGGACGTGATAAAGGAGA  
TTGATGCTCTGGTAGTCTCCCAGCTCAACCCAGAGCTAATGGAGTGGAAACGCAAGCAGC  
AGATTAAGTGTATAGGCGGTCCGATGCTCACTGGATTGGAACAACCTCCAGAACTGGTTTA  
CTCTGACAGCCCAAAGCCTGTTCCAGATGAAACGTCAACTGGACAAAATGGGGGAGCTTA  
TCCTGAAGGTGACCTATGAGAGCGACCCCATCCCCCTGCAGAGACCGCAGATGGAAGAG  
CAGGTAAATACCTACTCTACCACCTCATCAGAAGCTCCTTTGTGGTGGAAAAGCAGCCTT  
GTATGCCAACCCACCCCCAGAAGCCTCTCATTATCAAGACTGGAGTGCAGTTCACCACCA  
AAGTCAGATTGCTAGTTAAACTCCCAGAAGTGGATTATCAACTGAAAGTGAAGACAATAT  
TTGACAAGGACCTTCCCCCTGGCAGAGTAAATCGTCAGTTTTTTCATCCTGACTACTAACAC  
CAAAGTAATGGACGTGGAGGAATCATCCAATGGCTGTCTATCTGTGGAATTCAGACACTT  
GCAGCTGAAAGAGAAGAAATATGTGAATGGAACCAAGGTGAACGAGGGTCTCTCTCCG  
TGACGGAGGAGCTCCACTCCCTCAGCTTCGAAGCCCAGTTCAACATACTGGGCATCAATA  
TTGACCTGGAGACATGCTCCTTTCTCTTGTGCTGATATCCAATGTCAGCCAACCTGCCTGG  
AGGATGGGCCTCTGTAATGTGGTACAATCTGCTAACGGATGAACCCAAGAACTTGGGCTT  
CTTTGCCAATCCCCCGCGAGCCAGTTGGGGCCAGCTCTCTGAGGTATTGAGTTGGCAGTTC  
TCCACCTTCGCTGGACGGGGCCTCAACAGAGAGCAGCTGCACATGTTGGGAGAGAAGCTA  
TTGGGTCACCAAGCTTCCCACAGTGAATCTCAGGTGTCCTGGTCAAAGTTCTGCAAGGAA  
AACATACTGGGAAGCCTTTCAGTTTCTGGATGTGGTTGGATTCCATCCTAGAGCTCATCA  
AGAAGCACCTGCTTCCCATCTGGAACGACAACCTGCATCATGGGATTTGTAAGTAAGGAAA  
CCGAGAGATCCCTGCTGAAGGATAGGGAGCCTGGGACCTTCTGCTACGCTTCAGTGAGA  
GCCATCTTGGCGGGATCACGTTACGTGGGTGGAGCAGTCAGAAAATGCAGGAGAAGCC  
AAGTTAATCTCGGTGGAGCCATACACAAAATCCCGTCTCAGTGCCCTCCCATTGCTGAC  
ATCATCCGTGACTACAAGGTTTTTCGCAAATGGGGGAAGCCCCGGAGAACCCCCTCAAGTTC  
CTCTACCCTGACATTCCCAAAAATGAGGCCTTTGGCCGGCATTACAACAGTCAGCAGAGC  
AAAGTCTTTCATACATACCATCTATGCTGATCCCCATCTCTACTTTGCATGCCACACCTC

CCCCCTGCTCCTCCCCAGAGCCTCCCATGTCCCCTGGGATGTTTGATATGCTCACCCAGCA  
CCTTAGCCCCTTGAGATTGAGACTGCTATGAGTTCTCCATACTCTGAGTAG

**IFN $\gamma$  (XM 010882688)**

ATGGATATGTTGTTAAGGGCTGTGCTGTGTGTCTGCCTGCTGGACACGATGACTTCAGGAT  
GGGGCTGTGAGGCCCAGCACACATCAGACAACATGAAGACACACATAGAGAGGCTACGG  
AACCACTTTAAGATCTCCAAGGACCAACTGTACAATGGACACCCTGTTTTCGCCAAGGAA  
ACCTTTCAGAACAAAGTATGAGGACAATGAGCGGCGAGTGTTGATGAGTGTGGTTCTGGAG  
GTATACCTCAGTCTCTTCACCCATATGCTGAACCAGACAGCAGACCAGGAACCGAAGGAT  
AGTCTGATATATGTCCAGAAAAAGGTTTCAGGACCTCCAAAAGCACTACTTCCTGGGGAAT  
ATACCTGAGCTCAAAAGACTAATGCAGGATCTGTGGGCCATCAAGACGAGTGACAGCTTA  
ATTCAAGGGAAGGCCCTCTCCCAGTTGAGGACCATGTACGAGGAGGCCTCCAAACTGGCC  
AATCACATCTACCTGAGAAAGTCCAACCGCAGGAAGCGACGGCAGGCCCTGAGGCACCA  
AGCTATGGCGGGCTGA

*Th17-Signature Genes*

**IL-17A/F1 (GATF01011446)**

ATGGGTTTAATTTTAAACTTACACTCTCTAATGGCTCTTTGTACGATGGGGGTGTTGGTGA  
TGATGATGAATATGGCACAGGCATTACCCACCCCAACCCAGAGAAAATACTGAGCAACC  
CTCGGGCTCACAAGAAGTCTGCAGAGCCATCCGATTCAGACACAATAACTGTCCCCCTGC  
ACATAGACCCTAAAGGCTTGTTCTTCCCGTCCGATCAGGCCTATTGGGAACCATTCAT  
CTCCCCATGGACTTACCACACAACGCATGACGAGAGTCGTTTTCCAGTGTCATCTCTGAG  
GTCAAGTGCCTCTACAGGGCTGTCTGAGCATCACGGGTAAAGAGGACAGGAGCCTTGA  
GTCCAAACCCATCTACCACCAGATCCTGGTTTTAAGGAAGGTGGTGGGGAGCGTGGACAG  
ATACCATTACCGGCTGGAGTCAAAGATTATTGCGGTGGGCTGCACTTGTGTGTCAGGCCTGT  
CATCGTACACCAACAGCAGGAGTAG

**IL-17A/F2 (GATF01034854)**

ATGTCGAAGTATCTGGTTCTGTGTTTTGTGTCTCTGCTGCTGAGCCTGACTGTCTCAGATGT  
GAAAGCGGGGACAAAGGAATGGTGTAAGGACACACTGACAATCCCTTCAGACTACAACA  
GCCCTCCCGAGGAAGAATCAAAGGGAAATGGAAATATCCACACACACTCGCTGTCCTCCT  
GGACCTGGAAGACCACTAGGATGGAAAACCGTATTCCGGAGACCATCTGGGAAGCCGTG  
TGCAGCTCTATGTATTGTGTCTACCCACCAACAGCAGCCAGGGAGTAGGCTACAGGCAGA  
ACTCTGTACCTATCTACCAGCAAATCTTGGTGCTTCACACCTCAGCCACCAGCAAATGTTAC  
CGAGCCTCCTTTCTAAATGTGGCTGTGGGGTGCACCTGTATCTGGGCAAGGACCTATTGA

**IL-17A/F3 (XM 010883130)**

ATGCTTCTGATCGCGTTCTTCAGAGGTTTGCTGGTGCTGGGTCTGGTCACATCATTGCATG  
GACTGAAGAAAGGTTTCGAAGAACCGAGCGAGGCTGGGGAAAGGCTCCGGCCCAGAGGAC

ACCACGTTTCTCTATCTGGATTCTAAAATAGCCACCCCCACCCTCTCAGTGTCTCTGTAG  
CCAACAGGTCCCTGTCTCCATGGACATTCAGGAATCCCATGTTAAGAACCGGTTTCCTGA  
ATACATTGCCCAGGCTCAGTGCCAGATGTCTGGCTGTCTAACGCCTGACGGAAGGGAGGA  
CTTGTCATGGAGTCCAAACCCATTCTGTATCAGATCCTGGTGCTACACAGAGTTGAGAA  
AGACGATGGCCGCAAAGAGAAGAGGAAGAAAGGGAATGTGAAGAAGAACAGGAAGGGG  
AAGAGATATTTCTACACACTGAAAACAGAGATTGTTACAGTGGGCTGTACCTGTGTGAGG  
CCAATCCAGCTACCTCATTACTAG

**IL-21-1 (XM\_010893846)**

ATGCTGAGTGGACAGAAAACGGACTTAATTCTAGCCGTTTTGCTCCTCTTCTTCAGCGCCA  
CGAATATGAAACGGGCTGGACCATAACAGCCGCGAAACTATCCTGACACTGAAGTACATAT  
TAGATAAACCCCAAGAGATGGAATCGCTTGAGTGCAGTCTTTACACCCCGACGCTGGATG  
AATACACGAAATGCCCCATGTCTACCTTCAGTTGCTATGTAAATGAGGTGAAAGTCTTGG  
TGTCAGAGACTGGGAGGTCCCCTATAAAACGACTAGCCGAACAACCTGATCCAACCTGAACA  
GCACAAGTAAACAACAGAAGGAAAGTGATGCTTGTCCCTGCTGTGAGTCCTACAGTGAAC  
AGCCCCCAAAGTCTTCTTATCTACATTAAGAATTATTCTGGAGAAAAAAAATACAGCTG  
TCGAGCAGAAACCACGAGGGACACGTAATGGATAG

**IL-21-2 (XM\_010893845)**

ATGCTGAGTGGACAGAAAACGGACTTAATTCTAGCCGTTTTGCTCCTCTTCTTCAGCGCCA  
CGAATATGAAACGGGCTGGACCATAACAGCCGCGAAACTATCCTGACACTGAAGTACATAT  
TAGATAAACCCCAAGAGATGGAATCGCTTGAGTGCAGTCTTTACACCCCGACGCTGGATG  
AATACACGCAGAAATGCCCCATGTCTACCTTCAGTTGCTATGTAAATGAGGTGAAAGTCT  
TGGTGTGAGACTGGGAGGTCCCCTATAAAACGACTAGCCGAACAACCTGATCCAACCTGA  
ACAGCACAAGTAAACAACAGAAGGAAAGTGATGCTTGTCCCTGCTGTGAGTCCTACAGTG  
AACAGCCCCCAAAGTCTTCTTATCTACATTAAGAATTATTCTGGAGAAAAAAAATACAG  
CTGTCGAGCAGAAACCACGAGGGACACGTAATGGATAG

**IL-22 (GATF01012417)**

ATGAAGTGCACCATGATCAAACCTGCTTACCGCCGCGGTAGTGATGGTGAGCATGTGTTTG  
CTGCGGGATGCGTGTGCGCTCTCCATCCACATTCCACTCAGCGCCCCTTTGCAGAACGCGG  
ACACCGACGCCCTGGTACAACAGGTGGCTCGACATGCACAAAGTTCAGACACAGATACA  
AACGTTAAACTGATGCCAGACGTCGATACCAAAAAGAACCATCGTGACATCTGCTGCCTC  
CACGCCAACATCCTGGATTTCTACCTGAGTAACATCCTGATCTCAGATAATCACAAGCATC  
CTAAACTCCCTGAGCTGAAAGAACACCTGGCGCGAGTTAGCAAAGACCTAAAGGACCAT  
GGCTGTGCTGTCAAACACTACAGCAATGATCGCCACAACATCGCTTTCCGCAAGAAGTTG  
TCCGAGATGGGAGGAGGGAAAGGTATAAGGAAAGCTATTGGAGAGATCGATATCCTGTT  
CACTTATCTGAAAGATTTCTGTGTCCAGGTCTAA

*T<sub>reg</sub>-Signature Genes***FoxP3-1 (XM 010875638)**

ATGGAACAGACTGAGAGTGACAGGCTGAAGAGGGGGCGGCTGAACAGTGGGCGACAGC  
AGCAGCAACAGCGCGAGCGGCGGGGTGAAGACATTGAGGCAGCAGACCCACGTACCCAG  
CCCAGTGATTCTGTCCCCCCTCAGCTCCACACACGCAACTCTGTTACGCAGATGGGCTTCC  
CACTGACAACGAGACATGGAGGTCCCCTCGTGCCCTCCTCATCTCAGCTCCAGGGAATAC  
TTTTACAACAGTGTTCCAGTGAGGGGGGAATTGAGACCATTTCTGCAACGGGTGTCTCGGC  
GTCCCCAGTTGAGCCAGCCAGACCCTCGGTTCTACGTCAGGGTCTCCAGGCTGCCCAGG  
CTGGCTATGTACGACACCATGCACCATATACAGAGGCCAGTTCTGCTCCACCCACCACAC  
TGTGTAAGGTGGAGGTGGACACAGGGATTCAGGGATCGTCTTCACCCCCTCACCCCTGGGC  
TCTCTCCTGAGCCCACTCGTCACCCCTCTCCCCTTAGGGGAACCAGTCCTAAGCAAAGCTC  
CATCATCACTAGGCATCACAAACAGACAGCTCCACTCTGACCTTGACCATGGAGGCTACAG  
CATTGCGCAGTGGCGTGCTCAACAAGACATTGTGCAGTTCTTGGAGAACCAGCTGACGGT  
GGAAAAAGAGAACTCCTTGCAATGCAACTCCATCTGCACCTATCCGAGCACAAGTTGAC  
TGACTTGAAGGCATGTTTCAGATTGGCCCTACAACAAGAGCCTGGCACTTGTCTTGCCCCA  
AAATGCAGATGGAGCAGCACGCAACGCCACTAAGGAGCAGGAAGAGCTAGCACAGCCCG  
GGTATTGGCATGCTGCCACTCACCCACACGTAAGTCCAGATCTTGTCCCGAGTGTTGAGTG  
TTACAAATACAACAACATCAGGCCTCCATTACCTACGCTTGTCTAATAAGATGGTCTATA  
CTGGAGTCTCCGGACAAGCAGCGCTCTCTGAATGACATCTACAACCTGGTTCACCACCATG  
TTCTTCTACTTCCGACACAACACGGCAACATGGAAGAACGCTGTACGTCATAATCTTAGC  
CTACACAAATGTTTTGTGCGAGTGGAGGGAGGAAAGGGGGCCGTCTGGACGGTGGATGA  
ACTGGAATATCAAAGGAGAGAAAAGGACAAAAATACCACAGGGATCATCATGTGAAATGGC  
TGGCCCCCTACTCCTTATATCGTCCAGAGGGACCTTGA

**FoxP3-2 (XM 010875638)**

ATGGAACAGACTGAGAGTGACAGGCTGAAGAGGGGGCGGCTGAACAGTGGGCGACAGC  
AGCAGCAACAGCGCGAGCGGCGGGGTGAAGACATTGAGGCAGCAGACCCACGTACCCAG  
CCCAGTGATTCTGTCCCCCCTCAGCTCCACACACGCAACTCTGTTACGCAGATGGGCTTCC  
CACTGACAACGAGACATGGAGGTCCCCTCGTGCCCTCCTCATCTCAGCTCCAGGGAATAC  
TTTTACAACAGTGTTCCAGTGAGGGGGGAATTGAGACCATTTCTGCAACGGGTGTCTCGGC  
GTCCCCAGTTGAGCCAGCCAGACCCTCGGTTCTACGTCAGGGTCTCCAGGCTGCCCAGG  
CTGGCTATGTACGACACCATGCACCATATACAGAGGCCAGTTCTGCTCCACCCACCACAC  
TGTGTAAGGTGGAGGTGGACACAGGGATTCAGGGATCGTCTTCACCCCCTCACCCCTGGGC  
TCTCTCCTGAGCCCACTCGTCACCCCTCTCCCCTTAGGGGAACCAGTCCTAAGCAAAGCTC  
CATCATCACTAGGCATCACAAACAGCTCCACTCTGACCTTGACCATGGAGGCTACAGCAT  
TGCGCAGTGGCGTGCTCAACAAGACATTGTGCAGTTCTTGGAGAACCAGCTGACGGTGGGA  
AAAAGAGAGAACTCCTTGCAATGCAACTCCATCTGCACCTATCCGAGCACAAGTTGACTGA  
CTTGAAGGCATGTTTCAGATTGGCCCTACAACAAGAGCCTGGCACTTGTCTTGCCCCAAA  
TGCAGATGGAGCAGCACGCAACGCCACTAAGGAGCAGGAAGAGCTAGCACAGCCCGGGT  
ATTGGCATGCTGCCACTCACCCACACGTAAGTCCAGATCTTGTCCCGAGTGTTGAGTGTTA

CAAATACAACAACATCAGGCCTCCATTACCTACGCTTGTCTAATAAGATGGTCTATACTG  
GAGTCTCCGGACAAGCAGCGCTCTCTGAATGACATCTACAACCTGGTTCACCACCATGTTCT  
TCTACTTCCGACACAACACGGCAACATGGAAGAACGCTGTACGTCATAATCTTAGCCTAC  
ACAAATGTTTTGTGCGAGTGGAGGGAGGAAAGGGGGCCGTCTGGACGGTGGATGAACTG  
GAATATCAAAGGAGAAAAGGACAAAAATACCACAGGGATCATCATGTGAAATGGCTGGC  
CCCCTACTCCTTATATCGTCCAGAGGGACCTTGA

**IL-10 (XM 010874587)**

ATGTCTCGCCTCTCTGTCCTCCTGTTCTGACGCTGGTTGCTGTGTTATGGTGTGAGCATGC  
CCAGAGCAGAGCTGTGACGTGCTCTAACCGCTGCTGCTCCTTCATCGAGGGCTTCCCTGTC  
CGTTTAAAGGAGCTCCGCACTGCCTATTCCAATATCCGAGACTACTATGAGGCCAATGAT  
GCTCTGGAGACGGCTCTGCTAGATGAAAGCCTTCTACACAACCTTCATGAGCCCTTTCGGTT  
GTCATGCCATAGACAGGATCCTCAAGTTCTACCTCGACACGGTTCTACCCACAGCTGTGA  
ACAACAACCAAACGCATAACGACCTAAAATCTCCAATCGACTCAATCGGAAACATCTTTC  
ACGAGCTGAAGAAGGAGATGATCCAATGCAGGAACTATTTCTCCTGTAAGAAACCTTTTG  
ACATACAGGAGTTAATCTCTTCATATAAAAAGATGGAGGCAAATGGCCTGTATAAGGCTA  
TGGGAGAGCTTGACCTGCTCTTCAACTACATTGAAGAGTACCTGGTGTCCAAGAGACGCA  
AACAGTGA

**TGFβ-1 (XM 010898895)**

ATGAGGCCGTTGTGTTTAGCCCTGGTGTGTCTGGCAGCGCTGTGTCTGGTTGCCGGGACAG  
CGAGTGGCATGTCCACCTGTAAGACTGTGGACCTCGAGCAGGTCAAGAGGAAACGTATCG  
AGGCCATCAGGGGACAGATCCTGTCCAAGCTCCGGATGCCCAAGGAGCCAGAGGAGGAG  
CAGTCGGGGGAGGGGAAGGAGATCCCCTCAGAACTCCTCTCTCTCTACAACAGCACGGTG  
GAGCTCGGTGAAGAGCAGAAGGAGCAGGCTCAACTCAGCCTACAGGAGAAGGAGGAGG  
ACTACTTCGCTAAAGTGGTCCACCAGTTCACCATGAGCGCAGATAAAAATGTCACAGAAC  
ATCAGATGCTGTTCAACCTAAATGAGATGAGGTCCAACATTGGGGATTACCATCTGTTGT  
CCACTGCTGAACTCCGCCTGCTCATCAAGAACCCTTCAATTGACCCAGGCTCAGAGCAGC  
GTCTGGAGCTCTACAGAGGGTTCGGTGACAGCAAACGATACTTGGGATCACGCTTCATCA  
CCAACGAGTTGAACAACCGGTGGCTGTCCTTTGACGTCACATCCACCCTGAAGGAATGGC  
TGAAGGGGAATGAGGACGAGCAGGGCTTTGAGTTGCAGTTGTACTGTGAGTGTGGAAAA  
CCTATGGAAAAGTTCCAATTCAAAATAGCTGGGTTGGAAAACAATGTGCGAGGCGACACA  
GCTAAAATGGCTAGGAACATGAGGAAGCCTCACATTCTGACCATGTCCGTCCC  
CCAGAACTACAGCTCCCAGCTCACATCCTCGCGCAAAAAGCGGGCCACCACTACAGATGA  
TGCCTGCACAGATAAAACCGAGACCTGTTGTGTGAGAAAGCTCTACATTGACTTCCGGAA  
AGATCTGGGCTGGAAGTGGATCCACAAGCCAAAGGGTTACCATGCCAATTACTGCATGGG  
TTCATGCACCTACATCTGGAACGCTGAAAACAAATACTCTCAGATCCTGGCCCTGTATAA  
GCACCACAACCCTGGAGCATCTGCCCAGCCCTGCTGTGTACCCCAGGCCCTAGACCCTCT  
GCCAATCCTTTACTACGTTGGAAGACAACACAAGGTGGAACAGTTGTCCAATATGATCGT  
AAAGAACTGTGATTGCAGCTAG

*T<sub>H</sub>2-Signature Genes***GATA3 (XM 010901334)**

ATGGAAGTATCCGCGGACCAACCACGATGGATGAGCCATCATCACCCCTCGGTGTTAAAC  
GAACAGCATCCCGGCTCACACCATCCAGGCCTCGGCCACTCGTATATGGACCCCTCGCAG  
TATCCCCTCACCGACGATGTGGATGTACTGTTTAATATCGACTCACAGGGTAACCACGTAT  
CTCCATACTATGGGAACTCAGTCCGAGCCGTCCAGAGGTACCCACCTCCTCCACACAGTA  
GTCAGGTGTGTCGCCCTCTTTACTGCATGGCTCTCTGCCGTGGCTGGACGGAAGCAAAG  
CCATGCAGCACCACAGCACTTCTCCGTGGAACCTGAGTCCTTTCCAGAAGAGCTCATTGC  
ACCACGGTTCCCCGGCCGGTCTCTCCGTCTACCCCCCGGCGTCCTCCTCTTCCCTGTCCGG  
GGGTCACTCGAGCCCGCACCTTTTCACCTTTCCCCCAACCCCTCCGAAAGACGTGTCCCCG  
GATCCGGGCATCTCAACCCAGGTTCCAGCAGCAATAGTCGCCAACAGGAAGAGAAAGA  
GTGCATAAAGTACCAGGTGTCTCTGGCCGAGAGCATGAACTGGAGTCTCACAGCCGGAG  
CATGGCGTCAATCGGAGCGCAATCCTCTGCCACCACCCCATCGCCACATACCCATCCTA  
TGTCCCCGAATACGGCCCAGGCCTCTTCCCACCAAGTAGCCTGATAGAAGGTAGAGAGTG  
CGTTAACTGTGGAGCTACGTCGACCCCGCTCTGGAGGCGGGATGGCACTGGTCACTATTT  
GTGTAACGCCTGCGGACTCTATCACAAGATGAACGGGCAGAATCGGCCCTCATCAAACC  
CAAGCGACGACTGTCTGCTGCAAGACGGGCAGGAACGTCGTGTGCGAACTGTCAAACGA  
CCACCACAACACTGTGGCGAAGAAACGCGAATGGGGACCCGGTGTGTAACGCTTGCGGT  
CTATACTACAACTGCACAATATCAACCGACCTCTCACCATGAAGAAAGAGGGCATCCAG  
ACCAGGAACAGAAAGATGTCCAGCAAGTCGAAGAAGAGCAAAAAGTCCCACGACAGCAT  
GGACGACTTCTCCAAGAGCCTGATGGACAAGAGCAGCTCATTCAGCCCGGCTGCTCTGTCA  
CGTCACATGTCCTCTTTCCCTCCCTTCTCACACTCCGGCCACATGCTGTCCACCCCAACGCC  
CATGCATCCCTCTTCCTTCGCCCCACATCCCCACTCCAGTATGGTCACTGCCATGGGCTAG

**STAT6 (XM 013136358)**

ATGGCACAGTGGGCGCAGATGAAACAGCTGATTCCCTATCTGCCAACGCAGGCGCTTAAC  
GAGCTCTACCCAAACTCCTTCCCCATGGACGTCAGGTGCTACCTGGCCAACTGGATCGAG  
GAGCAGAGATGGGAGGACTTTGATCTAGAGAAGGTAGAGCAGGAGCCACAGGCCTTGTC  
TCTGTTGGACCAGATCACTTCCTACCTGTTGAGCCTTGCCAGCAGAACCCCAACGTGGTG  
GAGAGGATGAGACTGCAGCACATCTCCAGGAGCATGAGCATGATGCGCTCGCAGCCCCCT  
GAAGCTGGTGCTCACCGTGAGGGACGTTCTGAGGAAGGAGAGAGACCTTCTCAGTCGGA  
CGTCCGCTCAGATCCCGCCCCACTTCCCCCGTCCCCAGCCAGGATCCCATCTCTGTGGG  
CCCCTCCACCCGGGACGTGGACCTGCTGGTGCTCAAGGTGCTGGAGATCCAGAACTGCAG  
ACAGCAGATCCACCAGCTGCAAGAGGAACTCAACTGGGAGAGGCAGAACTATGAGTCAA  
TCCAGGGCTTTGGAACAGGCACTCTTCAGCAGGCCTCGACCAATGGAATGGACACCGGCA  
TCTCAGAGGTCACCAAACCTGCAGAATAACATTAAACAGCATGAGTACAATGGCCAGGTCA  
TAGCCAAGAAGCGTGTTCAAGTTGCTCCAGGATGCTGTATCTAGTCTGGAGAGTTGCCAGT  
CTCGTCTGATCAGCCGAATCAAAGCCTGGAGGTGGGAACAGCATCAGGCTACCATAGGAC  
ACCCCTTTGATGACAACCTTAGCCCTATGCAGACATGGTGTGAGCAACTTCTTGGGGTGA  
ATGGGAAGTTGAGACAGGAAGTGATGCTGGCCGGCGAGCCAATCCCAGAGCTGCAAGAC

AGACTGGGACTTCTGCTGCAAACCCTAATTCAGAGCTCTCTGGTGGTAGACAAGCAGCCT  
CCCCAGGTAATTAACCCAGTCCAAGTTCTCTACCACCGTGCGCTACCTGCTGGGGGAG  
AAAGTGGCGCCGGGGAAACCAGTTCTCCTCAAGGCTCAGATTATCACTGAGGCCCAAGCA  
AGAAACCTTGGACAGCTAGGCAGCGTACCCAGTGAGAATGTTGGAGAATTAATCAACAA  
CACAGCTATTTTGGAACACAACACCTCCAGCAAGAGCACCTGTGCCACTTTCAGGAACAT  
GTCTATAAGAAGATAAAGAGAGCCGACAGGAAGGGGTCTGGAGTCAGTGACCGAGGAG  
AAGTTTGCTCTCTACTTCACCACGGAGATCAGTATCACCGGTTGTGACATCCCCTATAGGA  
TACAGATGATCTCTGTACCTGTGGTGGTGATAGTCCACGGCAGTCAGGATAACAACGCCC  
TAGCGACCATCATCTGGGACTGTGCCTTCTCTGAACCAGACAGGATTCCATTTGTAGTTCC  
CGAGCGTGTGCCCTGGAAGCAAATGTGCATGACTCTAAACAGCAAGTTCATGTCGGAGGT  
TGGGACACAGCGTTGCCTAGACAATTACAACCAACATTTCTGGCCCAGAAGATATTTGA  
CAAGCCAGACATTGCTGGAGACTACAGCAACATGCTGGTTTCTGGGCACAGTTCAGCAA  
GGAGGTGCTTCTGGACGACCTTTCACCTTCTGGCAGTGGTTTGATGGCGTGATAGAGCTT  
ACCAAGAAGCACCTGAAGAGCTACTGGAGTGACGGGTTGATTTTTGGTTTCATCGGTAAG  
CAGCACCTCCACCTAATTCTGAAGGACCGACCCAATGGAACGTTCTACTGCGCTTCAGT  
GACTCAGAGATAGGAGGCATCACCATCGCTTATGTGGCCCCCTCAGAGAATGGGGGCCAG  
AAGATCCAGAATATTCAGCCATCCACTAAGAGAGACTTAGAGATCCGTTCCCTTGGCGAC  
CGTATTCGAGACATTGACTTCATCACACACGTGTATCCAGATCTGCCGAAGAATGATGTG  
TTTCGGAAATACTATACAGATAACCCACTGCCCAGTGGAACCTGGGTACCTGGCCGTCTCC  
ATACAGACCAGGGTGGGAGTCAGGGAATCCCACTGTGAATCTCCTCAGCGCAGTGACACC  
CCACAGGACAACCTGTCCTTTCTTTGCCATGGACCAAGGGAATACATCGGCCACGTCACCA  
TTCTTCCCTGTCTCTCCGCAACAGACGTTCCCGTCTAGCATCCAGCCGGTTCCGGTACCAA  
TGCCGGGGATCTACACAGACCCGCTGCCCGACCCCAACAGACTCTTCTCTGGACTGGACA  
TGTCCCAGGGCTCATCCACTGAGATGGAACCTAGAGCATATTCTGAACACTTTTGTCGAAA  
GGCCGGGTGAAGATGTGTAG

#### **IL-4/13A (GATF01012417)**

ATGAAGACTTTGATCTTTCTGCTTTCGGTTAACCTGGCGCTGGTTGTCACTGCAATTCCGTT  
AACACACGGGGATTCCATCCAAGCCAACCTTGGAGAAGATTATTGGCTTGGCAGAGGACTA  
CGTAAGAACTCTGCCTGAGGACTTTCTGAAGACACTTGGCAAAGATTAAACACATTTGAC  
TGAGACCACAAATAAATGCAAGGACTTCTTTTGTGAAGTTGAGGCAGTTTTGGCATCTCT  
GGAGCATCACTTCTTTGGTAAAAGGGGAGAGATTGTCCGATCACTGGAACAGTACAACAA  
ACATATGAATTGCCCCAATGCGAATCACAGCCAAGGCAACCAAGTGGAGCTGAAGAGAC  
TTCTACATGACCTTAAAGGATGTGGCCAGAAAATCAACTCCAATAAGGTTTAG

#### **IL-4/13B-1 (AZJR01088263)**

ATGAAGACTGTTGCTCTCCTCTTTTTTGCAATTGCATTAGGGTACAGTGACCTATTACTG  
AACCCACTGAACACAAGTATGAGCATCGGCTACTTAAAGATATCATGGATGATGTCACGG  
AACTGCTCAAAGGCCCAAAGAACTTTTGGACATGACAGTGCCTAAGGGATTTCGATAAAT  
ATAAGTGCTGTAGAAACGGGCAGCCTGAAGAGTTCTGCATAGCTGAGAAGATTCTGTCTG  
ACATAAACTCCACACAGAACGGGATTCCAGAAAAAATTAGGAAAATCAACAGGGTGCTG

AAACAATACAATATGTTTAAACCCAACTAACTGTACTGTGACAAAGAACGAAGATGAAGA  
GCAGCTAAGAGTTCTTCTTCAAGATCTCGGTTGTTGTGCTCAGGACAAATACTCCCATTTGG  
AATCACAAAAGAGCCAAGCGTTCTGCCTACAACAACTTAAAAATACAACATTCTGTATA  
AATCAATATTAA

#### **IL-4/13B-2 (AZJR01044272)**

ATGAAGACTGTTGCTCTCCTCTTCTTCGCATTTGAACTGGTCTACACTGCACCCACTCAGG  
ACGAGCATCATTTATTGAAGAGAATCATGGACACCGTCAACGATCTACTCAAGACAGGCC  
CGGAGGAGTTTTTGTCAAGTATTGTGCCGCACCAATTCGATAGAGAACGCTGCGGCCGTA  
AAGGGCCTGAAGATTTCTGCATAGCTGAGAAGATTTTGACTGACATAAACTATACAAAGT  
ATGGGATTCCAGAAAACAGGGAAATTCACCGGTTTCTGATACAATATAATAAGTTTCATC  
CAAACAACCTGCACTGTGGACAAAGATGAAGAGGAGGAACAGTTAAGAGCTCTTCTTGAA  
GATCTCTACTGCTGTGCTCAAGTCAAATACTCCCGTCGGAATCATAAAAGAGCCCAGCGC  
TCTGCTGATCGCAATCAATGGAACATTCACCAATGTGCAAAACAACACTTTTAG

#### **Rainbow Trout**

##### *TH1-Signature Genes*

#### **T-bet (NM\_001195793)**

ATGGGCGGCATAGGTGGCAATCTTTACCTCAGTATGTTGAATGGGACAGATACGCAAACCT  
TTCGGAAGACACCGATATCAACAATCACCTTCAACGCAGCAAGAATTCCGTGGATTTT  
AAAATGGGAATTCAGGACACCAGATTATATTACCAAGACTCAATTCAAAACGGACAGGA  
CGGATCGGCACTGCCGTACCACGCAGACCAAACCTGTGGCCGGATTCGGAGCGCAACCCG  
GGAGGTTTTACTCACCAACTCCCCACAATAGCTGCCATTTTCAGCAGTGTTCAGGTCGCCGA  
CTAGAAACGGAACGGGACAGACTTATTTACCAACGGGAAGCGAAGGTTTCTCGACAACT  
AGCAAAGAAGTTTACCCTGCCTCTGCGGAGAGTTATCCCGCACCCGTTCAACATGGGTAC  
TATCGCGCGCCACTCTACCCATTACCTGGGCTACAGGTGTGCGGAAAGACGCAGGCTCTC  
CTCAACAACCTATCCTCTGTGGGCGAAGTTCCACAAATACCAAACCGAAGTGATCATAACG  
AAACAGGGGGCGGAGGATGTTCCCCTTCCTGAGTTTCAACATCAGCGTTCTGGACCCGTCA  
GCCCACTACAATGTGTATGTGGACGTGGTCCTATCCGACCAGCACCACTGGAGGTACCAG  
GGAGGCAAGTGGGTCCAGTGTGGCAAAGCAGAGGGTAACATGCCAGGGAACAGGATGTA  
TATGCACCCAGACTCTCCCAACACAGGGGCTCACTGGATGAGGCAGGAGGTATCGTTTGG  
CAAGCTCAAGCTCACCAACAACAAGGGCAGTGCCAACAACGTGGGCGCAGATGATCGTTCT  
GCAGTCACTTCATAAGTACCAGCCACGGTTGCACATCGTCGAAGTGAAGGAGGATGGTTC  
TGAGGACCTCTTCCTCACCGCCAAGGCCCAGACCTTCATCTTCCCAGAGACCCAATTCATC  
GCCGTACAGCCTATCAGAACGCAGACATCACCCAGCTAAAAATAGACCATAACCCCTTT  
GCGAAAGGTTTCCGGGACAATTATGACGCGCTGTACGCACCACCTGACTCAGACCGCGTC  
ACCCCTCTCCCACCGAGGGCCAGCAGCTTTTGGCAGGTACCTGCTATACCCAGGGGTAC  
CTGATGGACCAGTACATGAACCCACTGCCCCAGAACCGCTTCTACAGCCGGGAGCACATG  
GCAGCCATGGGCCATCAGACCAAAGACCCCTCAGCCAGCCCCCACAACCGCTGGTACCGC

TCCCCCAGCAGAGTGTCACCTCCAACCGGCTGGACTTTAACTCCTATGAGGGTGACTTCT  
CCAGCAACAGCTTCTACAAGCCCTTCCCCCTGCAGACGTCAGCCCACCACACGCTGAGCT  
ACTACGAGGACAGCCCGTTCGCCACGGCCAGCGTATCCGTCTCACGAGCCTCCTCGGCAG  
CCTGGAGCACC GGCCGGCCCTCCCCCTCAGTACCTCAACCATCACTGTTCCAGTAAAGTCG  
GCCCCAGTCTAGGCTGGTTCAGGCCTGTGTCCTCTACCTCTCCAGGTCACCCCAGGCTCCA  
CCCCCGTCCCTCCTGGAGCCACTCCGCCCCCCCACCTTCACTGCAGGACAAGCCCAAGGA  
GGCGGGGGTGGTAGGAGAGGACCTCTGGCTGGAACCCCCCTCGGTCAAATCGGTGGACTC  
TGCTGACTCCGGCCTGTTTCGAGGACGGGGCAGAGGGCAAGAAGCGACGAGTGTACCCT  
ACGCTTCCAGCACGGAGAACTCGCCGCCACCCGCAGCGTGGAGGTCTGTGAAAAGGACT  
GCAGTAGTGATGCCGGCTACTACGGCTTTTATACCCACTGA

**STAT1-1 (NM\_001124707)**

ATGGCCCAGTGGTGCCAGCTGCAACTACTGGAGTCTAAATACCTGGAGCAGGTCGACCAG  
CTCTACGATGACTCCTTCCCCATGGACATCAGACAGTACCTCAGCAAATGGATTGAGAGC  
ATCGACTGGGAAAATGTGGCTGTTTCAGGACTCCTTAGCAACAGTACGTTTCCATGACCTC  
CTAGCCCAGCTGGATGATCAACACAGCCGCTTCGCCCTGGAAAACAACCTTCTGCTACAA  
CACAACATCCGCAAGATCAAGAGAAACCTCCAGGACCACTTTCAGGAGGACCCCGTTTAC  
ATGGCCATGATCATCTCCAGAAACCTGAAGGAGGAGCAGAAGATCCTGGCTGCTGCCAA  
AAGCATAGAGACCAACAGAGAAAACACACAGACTAGCATGGTTCTGGAGAAACAAAAAC  
TGGACAACAAAGTCAAAGACATGAAAAACAAGGTTTCAGGAAGCGGATCAGAATGTAAAG  
TCTCTGGAATACCTTCAAGATGAGCATGACTTTAAGGAAAATACTCTTAAGAACAGAGAA  
CATGAAATGAACGGGCTGACACCGAAACAGCTGGAACACGAGAAGCTGCTGATTGCAGA  
GATGTGTTTGAAGCTGAAGATCAAGAGAGGGGAAGTGGTTGGCCAGTTGGCGGAGGTGC  
TCAACATGGCCGAGGCGGTCCAGTCAGACCTGATCTCAGAGGAGCTGGCGGAGTGGAAG  
AAGAGGCAGCAGATCTCCTGTATCGGAGGACCACCCAACGCATGTCTGGACCAACTGCAG  
AACTGGTTCACAGCGGTGGCGGAAAGCCTGCAGCAGGTGAGGCAGCAGCTGAAGGAGCT  
CCAGGAAGTAGAGCAGAAGTACACATACGACAACGACCCAATCAAACAGCAGAAAGGCT  
TCCTGGAGGGGCGGGCCCTGACACTGTTCCGGAACCTCCTAGAACATTCTTGGTGGTGG  
AGAGACAGCCCTGTATGCCACACATCCACAGAGACCTCTGGTGCTGAAGACACAGGTGC  
AGTTCACTGTCAAGCTCAGATTTCTTGTGAAGCTCCAGGAATTCAATTATCAACTCAAAGT  
GAAAGCTTTGTTTGACAAGGACGTTACAGAAAAGAAAGGGTTTCGTAAGTTCAACATATT  
GGGCACCAACACAAAAGTTCTGAATATGGAGGAGTCAAATGGAAGCCTGGCTGCAGAGT  
TTCGCCATTTGCAACTGAAAGAGCAGAAAGTAGCCGGCAACAGAACAAATGAGGGGCCT  
CTCATTGTGACAGAGGAGCTGCACTGCATCTGCTTTGAGTCTGAACTCAACCAGTCAGGT  
CTGGAGCTCAAGCTAGAGACCATCTCCCTGCCATCGTGGTCATCTCCAACGTCAGCCAG  
TTGCCCAGTGGCTGGGCCTCCATCCTGTGGTACAACATGCTGACCAGCGAACCCAAGAAC  
CTGAAGTTCTTCTGAGCCCTCCTGCAGCATCCTGGGGTCAGCTGTCTGAGGTGCTGAGCT  
GGCAGTTCTCCTCTGTCACCAAGAGGGGACTCAATGAAGAGCAGCTAGGCATGCTGGCCG  
ACAAACTACTGGGCCAGAAAGCACAGAGGAATCCTGAGGGCCTTATCCCCTGGACCAAG  
TTCTGTAAGAGTCTCAATGAGAAGAGCTTTCCCTTCTGGCTGTGGATCGAAGCTATCCTGG  
ATCTCATCAAGAGACACCTGCTGTCCCTGTGGAACGATGGTTGCATCCTGGGCTTTGTGAG

TAAGGAGAGGGAGAAGGCCCTGCTGACTGGGAAGTGTCCAGGCACGTTCTTGCTGCGCTT  
CAGTGAGAGTAGCAGAGACGGAGCCATCACATTCACCTGGGTGGAACACGACCAATACA  
ATAAGCCTGTATTCCATGCAGTGGAGCCCTACACCAAGAAGGAACTGTCTGCCGTCTCTC  
TGCCTGACATCATCCGCACCTACAAGGTGATGGCAGCTGAGAACATCCCAGAGAACCCAC  
TCCGCTTCCTCTACCCAGACATCCCCAAAGACAAGTCCTTCGGAAAGTACTACGCTAGGG  
CCTCCGAGGCATCGGAGCCCATGGATGTGGAGGGTTCCAGCAGCACAGGGTACATGAAG  
ACAGAACTCATATCAGTGTGAGAAGTTCACCCATCTAGACTGCAAGACAACATGATGCCC  
ATGTCGCCAGACGTGTTTCGGAGAGCTGAAGAGGAGCGTTGCACCAGTGTTCCAGTGTTGG  
ACTGGTCCTAAGGAAATTGATGCTGTGATGACACCTGACTCGGACTGCAACTGA

**STAT1-2 (NM\_001124746)**

ATGGCCCAGTGGTGCCAGCTGCAACTACTGGAGTCTAAATACCTGGAGCAAGTCGACCAG  
ATCTATGATGACTCCTTCCCCATGGACATCAGACAGTACCTCAGCAAGTGGATTGAGAGC  
ATCGATTGGGAAAATGTGGCTGTTTCAGGACTCCTTAGCAACAGTACGTTTCCATGACCTCC  
TAGCCCAGCTGGATGACCAACACAGCCGCTTCGCCCTGGAAAACAACCTTCCTGCTACAAC  
ACAACATCCGCAAGATCAAGAGAAACCTCCAGGACCGCTTTCAGGAGGACCCCGTTTACA  
TGGCCATGATCATCTCCAGAAACCTGAAGGAGGAGCAGAGGATTTTGGCTGCTGCCAAAA  
GCATAGAGACCGACAGAGAAAACACACAGACCAGCATGGTTCTGGAGAAGCAAAAGCTG  
GACAACAAAGTCAAAGACATGAAAAACAAGGTTTCAGGAAGCGGATCAGAATATAAAGTC  
TCTGGAATACCTTCAAGACGAGCGTGACTTTAAGGAAAATATTCTTAAGAACAGAGAACA  
TGAAATTAACGGGCTGACACCCAAACAGCTGGAACACGAGAAGCTGCAGATTGTAGAGA  
TGTGTTTCAAGCTGAAGTTCAAGAGAGTGGAAGTGGTTGGCCAGTTGGCGGAGGTGCTCA  
ACATGGCCGAGGCGGTCCAATCAGACTTGATCTCAGAGGAGCTGCCTGAGTGGAAGAAG  
AGGCAGCAGAGCTCCTGTATTGGAAGACCACCCAACGCATGTCTGGACCAACTGCAGAAC  
TGGTTCACAGCGGTGGCAGAAAGCCTGCAGCAGGTGAGGCAGCAGCTGAAGGAGCTCCA  
GGAAGTAGAGCAGAAGTACACATACGACAACGACCCAATCAAACAGCAGAAAGGCTTCC  
TGGAGGGGGCGGGCCTTGGCACTGTTCCGGAACCTCCTAGAACATTCTTGGTAGTAGAGA  
GACAGCCCTGTATGCCCACACATCCACAGAGAACTCTGGTGCTGAAGACACAGGTGCAGT  
TCACTGTCAAGCTCAGATTTCTTGTGAAGCTCCCGGAATTCAACTATCAACTCAAAGTGAA  
AGCTTTGTTTGACAAGGACGTTACAGAAAAGAAAGGGTTTCGTAAGTTTAACATATTGGG  
CACCAACACAAAAGTTATGAATATGGAGGAGTCAAATGGAAGCTTGGCTGCAGAGTTTCG  
CCACTTGCAACTGAAAGAGCAGAAAGTAGCTGGCAACCGAACAATGAGGGGGCCTCTCA  
TTGTGACAGAGGAGCTGCACTGCATCTGCTTTGAGTCTGAACTCAACCAGTCAGGTCTGG  
AGCTCAAGCTAGAGACCATCTCCCTGCCCATCGTGGTCATCTCCAACGTCAGCCAGTTGCC  
CAGTGGCTGGGCCTCCATCCTGTGGTACAACATGCTGACCAGCGAACCCAAGAACCTGAA  
GTTCTTCCTGAGCCCTCCTGCAGCATCCTGGGGTCAGCTGTCTGAGGTGCTGAGCTGGCAG  
TTCTCCTCTGTACCAAGAGGGGACTCAATGAAGAGCAGCTAGGCATGCTGGCCGACAAA  
CTACTGGGCCAGAAAGCACAGAGGAATCCTGAGGGCCTTATCCCCTGGACCAAGTTCTGT  
AAGAGTCTCAGTGAGAAGAGCTTTCCTTCTGGCTGTGGATCGAAGCTATCCTGGATCTC  
ATCAAGAGACACCTGCTGTCCCTGTGGAACGATGGTTGCATCCTGGGCTTTGTGAGTAAG  
GAGAGGGAGAAGGCCATGCTGACTGGGAAGTGTCCAGGCACGTTCTCTGCTGCGCTTCAGT

GAGAGTAGCAGAGACGGAGCCATCACATTCACTTGGGTGGAACACGACCTATACGATAA  
GCCTGTATTCCATGCAGTGGAGCCCTACACCAAGAAGGAGCTGTCTGCCGTCTCTCTGCCT  
GACATCATCCGAACCTACAAGGTGATGGCAGCTGAGAACATCCCAGAGAACCCACTCCGT  
TTCTCTACCCAGACATCCCCAAAGACAAGTCCTTCGGGAAGTACTACACCAGGGCCTCC  
GAGGCATCGGAGCCCATGGATGTGGAGGGTTCCAGCGTCACAGGATACATGAAGACAGA  
ACTCATATCAGTGTCCGAAGTTCACCCGTCTAGGCTGCAAGACAACATGATGCCCATGTC  
GCCAGACGTGTTTCGGAGAGCTGAAGAGGAGCGTTGCACCAGTGCTCCAGTGTTGGAGTAG  
TCCTAAGGATATTGATGCTGTGATGACACCTGACTCGGACTGCAACTGA

**STAT4-1 (CDQ57838, FR904292)**

ATGACTTGTGTCCCCGAACGTGGATATTTCTGTGATAGCGCACCAGTCCAAAGACACAGC  
ATGAGTCAATGGAAACAAATTCAACAGCTCCAGATCAAATACCAGGAGCAGGTGGGCTA  
CCTTTATGATGACAACCTCCCTATGGACATACGGCAGGTGCTCTCCAACTATATTGAGAGC  
CAGGACTGGGATACTGCCGCAAACCATGAGTCCATGGCGACAGTTCTCCTCAGCAATCTC  
CTGTCTCAGCTGGACAGGCAGTGTTCTCAGGAACAGAACTTCCTACAAAGACACAACCTTG  
AAGTTCATCTACCAGCAGTTACAGACTAAATGCAAAGCCAACCCTCTGCTGATGGCCGGG  
GTCATTTCCACTTGCCTCAGAGAGGAGCGTCGTATCATCTCCACAGCCAGCATTCAAGAA  
CAGGGCCCATTGGAGAAGTCAATGCAGAATTCGGTGGCCTTCGAGAGACAGAAGAACAT  
GGACAACAGGGTTGCTGTGATCAGGAGTAGTGTGCAGATGATGGACCAGGCAGTGAAAT  
ACCTAGAAGACATGCAAGACGACTTTGACTTCCGCTATAAACTCTCCAGTCTCGAGATC  
CAGTGGACAGGAACACAGCGGCGATGAAACAGGAAGTGACCCGACTGCAGGAGATGCTC  
AACAACCTGGACTTTAAGAGGAAGGAGAACCTATCTAAGATGAGTGACGTGATAAAAGA  
GATTGATGCTCTGATAGTCTCCCAGCTGAACCCAGAGCTGATGGAGTGGAAACGCAGGCA  
GCAGATCAACTGTATAGGTGGCCCACTGCTCACTGGACTGGACCAGCTCCAGAACTGGTT  
TACACTGACAGCCCAAAGTCTGTTCCAGATGAAGCGTCAGCTGGACAAACTGGGGGAAC  
TATATTAAAGGTGACGTATGAGAGTGACCCCATCCCCTGCAGAGACCGCAGATGGAGG  
AGCAGGTCAAATACCTCATCTACCACCTCATCAAAAGCTCCTTTGTGGTGGAGAAGCAGC  
CATGTATGCCAACCACCCCCAGAAACCTCTCATCATCAAGACCGGGGTGCAGTTCACCA  
CCAAAGTCAGATTGCTGGTCAAACCTTCAGAGGTGGATTACCAACTAAAAGTGAAGACAA  
TATTTGACAAGGACCTCCCCCTGGTAGAGTGAATCGTCAGTTCTTCATCCTGACTACCAC  
CACCAAAGTAATGGACGTGGAGGAATCATCCAATGGCTGCCTGTCTGTAGAGTTTCGACA  
CTTGACAGCTGAAAGAGAAGAAATACGTTAATGGAACCAAGGTGAACGAGGGCAAATTCC  
TTATCCCGTTGATAGAGCCTGCCGTGTTTTTCATTGAGATGTGTTCAACTTTTTTGGTGTGTC  
CCTCACTGCACAAAAAATACCTGCTCCTTTCTCTGGTGGTCATCTCCAATGTTAGCCAAC  
TGCCTGGAGGTTGGGCATCTGTCATGTGGTACAACCTGCTGACTGACGAACCCAGGAACC  
TGGGCTTCTTTGCCAGTCCTCAGCGGGCCAGTTGGGGCCAGCTCTCTGAGGTACTGAGTTG  
GCAGTTCTCCACCTTCGCTGGGCGGGGCCTCAACAGGGAACAGCTGTGCATGCTAGGAGA  
GAAACTCTTGGGTCAGCAAGCCTCCCAAAACGAATGTCAGGTATCCTGGTCCAAATTCTG  
CAAGGAGAATATTCATGGGAAGAATTTAGTTTCTGGATGTGGCTGGATTCCATCCTGGA  
GCTCATCAAGAAGCACCTACTTCCCATCTGGAACGACAACCTGCATCATGGGTTTTTGTGAGT  
AAGGAGACTGAGAGGGCCCGTCTGAAGGACAAGGAGCCTGGGACTTTCCTGCTGCGCTTC

AGCGAGAGCCACCTGGGCGGGATCACCTTCACCTGGGTGGAGCAGTCCGATAGTGGAGA  
GGCCAAGTTCATCTCGGTGGAGCCGTACACCAAATCACGCCTCAGCGCTCTCCCGTTTGCC  
GACATTATCCGGGACTACAAGGTCATCGCAGACGGAGAGGTCCCTGAGAACCCACTAAA  
GTTCTCTACCCAGACATCCCCAAAGACGAGGCCTTCGGACGACTTTACAACAGCCAGCA  
GAGCAAAGGCAAGATGTCTGCCAAGACATTCTTTCCATACATACCATCTATGCTGATCCC  
CATCTCAACTTTGCAAACCACACCTCCCCCCTGCTCCTCCCCAGAACCCCCCATGTCCCCT  
GGGATGTTTGACATGCTCACCCAGCACCTCAGCCCCTTGGAGATTGAGACTGCCATGAGT  
TCTCCGTA CTCCGAGTAA

**STAT4-2 (CDQ57312, FR904285)**

ATGAGTCAATGGAAACAAATTCAACAGCTCGAGTTCAAATACCTGGAGCAGGTGGATTAC  
CTTTATGATGACAACTTCCCTATGGGGATTTCGGCAGGTGCTTTCTGACTGGATTGAAAGCC  
AGGACTGGGATATGGCCGCACACCATGAGTCCATGGCGACAGTTCTCCTCAGCAATCTCC  
TGTCTCAGTTGGACAGGCAGTGTTCTCAGGAACAGAACTTCCTAGAAAGACACAACCTGA  
AGAACATCAACAAGCAGTTACAGATAAAAATACAAAGCCTACCCTCTGCTCATGGCCGGGG  
TCATCTCCACTAGCCTCAGAGAGGAGCGTCGTATCATCGCCTCAGCCAACATACCGGAAC  
AGGGCCCGTTGGAGAAGTCTGTACAGAATTCCGTGGCCTTCGAGAGACAGAAGAACATG  
GACAACAGGGTGGTCGTGATCAGGAGTAGTGTGCAGATGCTGGACCCGGCAGTGAAATG  
TCTAGAGGACATGCAAGATGACTTTGACTTACGCTTCAAACTATCCAGTCTCGAGATCA  
GGCGGACAGGAACACAGAGCGGATGGAACAGGAAGTGGCCCGACTGCAGGAGATTCTCA  
ACAACCTGGACTTTAGGAGGAAGGAGATCCTGTCTAAAATGAGTGACGTGATGAAAGAG  
ATTGACGCTCTGATAGCCTCCCAGCTGAACCCAGAGCTGATGGAGTGGAACGCAGGCAG  
CAGATCAACTGTATAGGTGGCCCACTGCTCACTGGACTGGACCAGCTCCAGAACTGGTTT  
ACTCTGACGGCCCAGAGTCTGTTCCAGATGAAACGTCAGCTGGACAACTGGGAGAACTT  
ATCCTGAAGGTGACCTATACGAGCGACCCCATCTCGTTGCAGAGACCGCAGCTGGAGGAG  
CAGGTCAAATACCTCATCGACCACCTCATCAAAAGCTCATTTGTGGTGGAGAAGCAGCCA  
TGGATGCCAACCCACCCCCAGAAACCTCTCATCATTAAGACCGGGGTGCAGTTCACCACC  
AAAGTCAGATTGCTGGTCAAACCTCCCAGAGGTGGATTATCAACTGAAAGTGAAGACGATA  
TTTGACAAGCACCTCCCCCCTGGCAGAGTACATCGTCAGTTCTTCATCCTGACTTCCACCA  
CCAAAGTAATGGACGTGGAGGAATCATCTAATGGCTGTCTATCTGTAGAGTTCAGACACT  
TGCAGCTGAAAGAGAAGAAATATGTCAACGGTATAAAGGTGAACGAGGGTCCTCTCTCTG  
TGACGGAGGAGCTCCACTCCCTCAGCTTCGAGGCCAGTTCAACATACAGGGCATTAACA  
TCGACCTGGAGACCTGCTCTTTTCCTCTGGTGGTCATCTCCAATGTTAGCCAGCTGACTGG  
AGGCTGGGCCTCCATCATGTGGTACAACATGCTGACTGACGAACCCAGGAACCCGGACTT  
CTTTGCCAGTCCTCCGCGGGCCAGTTGGGGCCAGCTCTCTGAAGTGCTGAGTTGGCAGTTC  
TCGACTTTCAGTGGGCGGGGCTCAACAGGGAGCAGCTGTGCATGCTGGGAGAGAACTC  
ATGGGTGAGCAAGCCTCTCACAATGAATGTCAAGTATCCTGGTCCAAATTCTGCAAGGAG  
AATATTCCTGGGAAGCCTTTCAGTTTTTGGATGTGGCTGGATTTTCATCCTGGAGCTCATCA  
AGAAGCACCTGCTTCCATCTGGAACGACAACTGCATCATGGGCTTTGTCTAGTAAGGAGA  
CAGAGAGGGCCTGTTTGAAGGACAAGGAGCCTGGGACATTCTGCTGCGCTTCAGTGAGA  
GCCACCTGGGTGGGATCACTTTCACCTGGGTGAAGCAGTCCGACAGTGGAGAGGCTAAAT

TAATCTCAGTGGAGCCGTACACCAAATCACGCCTCAGCGCTCTCCCGTTGCGCAACATCAT  
CCGGGACTACAAGGTCATCGCAGACGGAGAGGTCCCTGAGAACCCGCTCAAGTTCCTCTA  
CCCCGGCATCCCCAAAGACGAGTCCTTCAGACGACATTACAACAGTCAGCAGAGCAAAG  
GCAAGATGGTTACCAAGACACGTTTATGA

**IFN $\gamma$ -1 (NM 001160503)**

ATGGATGTGTTATCAAGGGCTGTGATGTGTTTCTGCTTGATGGGCTGGATGACTTTAGGAT  
GGAGTAATGCTGCTCAGTTCACATCAATTAACATGAAGAGAAACATAGACAAACTGAAAG  
TCCACTATAAGATCTCCAAGGACCAGCTGTTCAACGGAAACCCTGTTTTCCCCAAGGACAC  
GTTTGAGGACAGTGATCGGAGGGTGTGATGAGTGTGGTTCTGGACGTGTATCTGAGTATC  
TTCGGCCAGATGCTGAACCAGACGGGGGACCAGGAAATGATTGAGAGTCTGAAATATGTC  
AAGGGGAAAATTTCAGGATCTCCAGAAACACTATTTCTGTTGGGAGGATACCTGAGCTGAGG  
ACACACCTGCAGAACCTGTGGGCCATCGAGACCAGCGACACCACAGTCCAGGGGAAGGCT  
CTGTCCGAGTTCATTACCATCTACGAGAAAGCCTCCAACTGGCCCTTAAGTTCATCTAA  
AGAAGGACAACCGCAGGAAGAGACGGCAAGCCCAGAGGCTCAAATCACACATCATGTAG

**IFN $\gamma$ -2 (NM 001160503)**

ATGGATGTGTTATCAAGGGCTGTGATGTGTTTCTGCTTGATGGGCTGGATGACTTTAGGAT  
GGAGTAATGCTGCTCAGTACACATCAATTAACATGAAGAGAAACATAGACAAACTGAAAG  
TCCACTATAAGATCTCCAAGGACCAGCTGTTCAACGGAAACCCTGTTTTCCCCAAGGACAC  
GTTTGAGGACAGTGAGCAGAGGGTGTGATGAGTGTGGTTCTGGACGTGTACCTGAGTATC  
TTCAGCCAGATGCTGAACCAGACGGGGGACCAGGAAGTGAGGGAGAGGCTGGACCAGGTC  
AAGGGGAAGGTTTCAGGAGACCCAGAAACACTATTTCTGTTGGGAGGGTACCTGAGCTGAGG  
ACACACCTGCAGAACCTGTGGGCCATCAAGACCAGTGACACCACAGTCCAGGGGAAGGCT  
CTGTCCGAGTTCATTACCATCTACGAGAAAGCCTCCAACTGGCCCATGAGATCCATCTAA  
AGAAGGACAACCGCAGGAAGAGACGGCAAGCCCAGAGGCTCAAATCACACATCATGTAG

*Th17-Signature Genes*

**IL-17A/F1a (KJ921977)**

ATGGGTTCTACTTCAAACGTACACTTTTTGATGGTGCTGTGTTTAATGGGGTTGTTGGTGA  
TGATGATGATGATGGGTGCAGAGGCTGCCCCCACGTCCATCCAGGGTTGACAGGGAGAC  
GCTCACAGAACAACCTTCAGGGACACAAGAAGCCTGTAGAGCCTTCAGCTCCAAACACA  
ATAACTGTCCCCCTGCACCTGGACCCGAGCGACTTGATTCCAGCCCGTCCCGTCAGATCCA  
TTGGGAACCACTCCATCTCCCCATGGACTACCAACACCACCTATGATGAGTCCCGCTTTCC  
CAATACCATCTCGGAGGTCAAGTGCTCTCTGGAGGGCTGTCTGAACGTCGCGGGTAAGGA  
GGACAGGAGCCTGGAGTCCAAACCCATTTACCACCAGATCCTGGTCCTGAGGAAGGTGAT  
GGGGAGCAAGGACAGATACTACTACCGGCTGGAGGCAAAGATCATCGCGGTGGGCTGCA  
CCTGTGTCAGGCCTAGCATTGAGCACCAACAGTAA

**IL-17A/F1b (KJ921978)**

ATGGTATCTACTTTAAGCTTCCAGTCTTTGACGGTGCTGTGTATGAAGGGGGTTTTGGTGA  
TGATGATGGGGGCAGAGGCGGCCCCCGTGCCCATCCAGAGAAGACAGAGAGCCACACA  
CGGACCACACTGCAGACACACAAGAAGCCTGCAGAGTCAGAGTCTTCAGGTCCCGACAC  
AGTAATTCTCCCCCTGCACCTAGACCCAAATTACTTGGTTCCTTTCCATTCCATCAGACCT  
ATTTACAACCATTCAATCTCCCCATGGACTTACAACACTACCTATGATGATAGACGCTTTC  
CCGCCATCATCTCGGAGGTCAGGTGCTCTCTGAAGGGATGTCTGAACATCAAGGGTAAGG  
AGGACAGGAACCTGAAGTCCAAACCCATCTTCTACCAGATCCTGGTCCTGAGGAAGGTGA  
TGGGAAAGTGGGAAGAAATGCCACTACCGACTGGAGTCAAAGGTCATCTCGGTGGGCTGC  
ACCTGTGTCAGGCCTACCATCGAACAGTAA

**IL-17A/F2a (AJ580842)**

ATGGAGCTCAAAAGCAACGTGTCTGAAGTACCTGGTTGTGTGCTGTGTGTCTATGCTGCTG  
GGCCTGACCATGGCGAAAGGAATGAAGGTGACAAAGGAGAGGTGTAACGAAACACTGAT  
CATCCCTTCAGACTTCTACAAGATTCCCACAGAGGAATCAGAGGGGAAATGGGAACATTCA  
CACACGCTCTCTGTCAACCCTGGACCTGGAAAAGCACTACAGTGGAGAACCGTATTCCTCA  
GACCATGTGGGAGGCCGAGTGCAGCTCTATGTACTGTGTCTACCCACCAACAGAAGCCA  
GTACATGCGCTACAGGCAGAACTCTGTACCTATCTACCAGCAGGTCGTGGTACTCTACAC  
TTCAGCCACCAGGAAGTGCTACAGCGCCTCCTTCCTGTCTGTGGCCGTGGGGTGCACCTGT  
GCCTGGGCAAGGACTACTTGA

**IL-17A/F2b (KJ921979)**

ATGCACCACTCAGACAGAAGGATGTGGAAGACATCAGAGATGGAGCTCAAGAACAATGC  
GTCGAAATACCTGGTTGTGTGCTGTGTGTCTATGCTGCTGGGCCTGACAATAGCCAAAGG  
GGAGGTAGGGGAGAAGGAGAGGTGTGAGGACATACTGACCATTCCTTCAGACTACTACA  
AGACTCCTTCAGAGGAATCAGAGGGGAAACGGGAACATCAACACACGCTCCCTGTCCCCCT  
GGACCTGGAAACCCATTACAGTGAAGAACCGTATTCCTCCGACCATTGTTGGGAGGCCAAGT  
GCAGCTCTATGTACTGTGTCTACCCACCAACGGCAGCCAGGCCGTGGGCTACCAGCAGA  
ACTCTGTACCTATCTACCAGCAGGTCATGGTGCTCCATAGCTCAGCCACTAGGAAGTGCTA  
CAACGTCACCTTCCTGTCCGTGGCCGTGGGGTGCACCTGTGCCTGGGCAAGAACCCTTGA

**IL-17A/F3 (KJ921980)**

ATGCATCTGGTCATGGTCTTCAGAGGTTTACTGGTGCTGGGTCTGATCATGTCACTGGATG  
GACATAAGAAAAGCCAGAAGACCAAACGGAAGGCAGCCAATGGCTCCGGCCCAGTCGAG  
GTCTTTGGACGGAGAGTAATGACTGTAGGTTTAGTTATGGATCCTAACCTGAAGACCGCT  
GTCTTCCCTGTCTTCATAAAGCCACCAGGTCTCTCTCTCCGTGGACATACAGCGACACAT  
ACGATGAGACCCGGGTCCCTCAACATATCTCCCAGGCTCAGTGCCAGAGGTCTGGCTGTC  
TGACCCCAGGCGGAGAAGAGGACATGGGGTTGGAGTCCAAACCCATACTCTATCAGACCT  
TGGTGCTCCGCAGGGTTCAGGGAGAGAAGGGCAGCAGTGGAGGGAGGAGGAGGAAGAA

GGGGAGGAAGAACAAGGGTTATTTCTACAAACTGGACAGTGAGAGTGTAATGTGGGCT  
GTACCTGTGTGAGACCCAGCATTTTCCCTCAGAAGCAGTGA

**IL-21 (NM 001246331)**

ATGAAGCTGCTTGTTTGTATCTCCTAGCCATCACCTGTGTATTGGTGGATGCAGACAAGG  
GTGAGAGAATCCTGAAGCTGACTGAAGTAATAAAGGAATTAAGCGCTAAACAGAACTG  
TGACGCACAACAGTGTGATGTGCGAACGCTCCTTCAATGGATACGGAAGAGTGCTGTTCCCA  
GTCTGCCTTGAAGTGCTTCCGGGCGATGGTACCTCATCTCAAGGCCAAAAATAAGACCCCT  
CAGCGTAAAGTTATCAAAAACCTCAACAACCGAATGATTTTGGGAAGTCTGGACTCCTGCA  
GTCAGGAGGAGAGAGAGAAAACAGTCTGCCAAGGATGTGATTCATATCCAAAGGACAGCC  
AGAAATGTGTACAACAGTTGGAATCTCTGCTTCAAAAGGCCATCAGTAGACTGGCGTGA

**IL-22 (NM 001164064)**

ATGAAGTTCAGCACGGTCCAACCTCGTAGCCGCTGTGGTAGTGGTGATGAGCGTCTGTCTG  
CTGCGCGAATCCGTGGCGCACTCCATCCATCGCCCGCTCAGCGCCCCCTGCACAGCGCG  
GATACCGACACCATGGTACAGCAGGTGGCTCAACATGCGCAAAGTTCTGACACCGATACT  
GACACTAAACTGATGCCAGACATCGATACTAAAAAGAACCACAGAGACATCTGCTGCCTG  
CATGCTAACATCCTGGACTTCTACCTGAGTAACATCCTGACCACTAAGGAGAAGCAGGAC  
AAGCATCATCCTAAACTCCCTGCCCTGAAGGAAGACCTGGCCCGAGTCAGCAGAGACCTG  
AAGGAACACGGCTGTGCTATTAAACACTACAATGACCACCACCACAGCATTGCTTTCGCG  
AAGAAGTTGTCCGAGATGGAGGAGGGGAAAGGAATCAAGAAAGCCATTGGAGAGATCG  
ACATCCTCTTCACCTTCCTGAAAGACTTCTGTGTGCACGCCTAG

*T<sub>reg</sub>-Signature Genes*

**FoxP3-1 (FM883710)**

ATGCTACAGACTGAGAGTGAGAGGTTGAAGAGTGGGCGACTGAACAGTGGGCGACATCA  
GCAGCAGCGAGAGCAGCGAGAGGAGCCAGACGCATGTACCCAGCCCAAGATTCTGCCT  
CACCTCAGCTCTGTGCTCGTACCTCTGTTACGCAGATGGGCTTCCCATTGATGATTAGACC  
TGGAGTTTCACTTATGGCCTCGTCTCAGCTCCAAAGCATATTGTTACGGCAGTGTTCCAGT  
GAGGAGGAGGGGAGATCGCTCCTGCAACGGGTGTCTCTGTGCCCCCAGTTGAGCCAGCAC  
AGACCCTCTGTTCTACGCCAGGGTGTCCAGGCTGCCCACGTGCGACCGCAGGCACCATGC  
ACTCTAACAGAGGCCAGTTCAGCTCAGCCCATCTCACTGTGCAAGGTGGAGGTGGACACA  
GGGAGCCGTGGACAGTCCTCTCCCCACACTCTGAGCACTCTCCTGGGCCAACTCGTCAC  
CCCTCTCCCCGAGGACAGCCAGTCCTAAGCAGAGCTCCATCATCACCAGGCAACATGAG  
GCAGGTCACCCAACCCTAGAGGGGTCCAGTGCTCTGTTTCTCAACGGACTCTGCTGCTGG  
CCTGGCTGCGATGCAGTATTTGAAGAATTCCCCAGTTTTTTGAAACACCTCCACTCTGACC  
ATGGCCATGGAGACAGAAGCATTGCACAGTGGAAGGTACAACAAGACATGGTGCAATAC  
ATGGAGACCCAGCTGACTGTGGA AAAACAGAACTCTTCGCAATGCAACTACATCTGCAC  
CTATCTGGACACAAATCAACTGTCTTGAAGGCAGCTTCAGACTGGCCCTACAGGCACAGC  
CTGTCACTAGGCCTGCCCCAGAACCGAGGTGGAGTGTACGCTGCACCACTAAAGAGCCA

GAGGAGCTGGAGCAGCATGAGTATTGGCCCTCTGCTGCTCCCCACCACCTACGGCCAGAT  
CTTATCCCGAGTGTTGAGTGTTACAAATACAACAACATTAGGCCACTGTACACCTACGCCT  
GCATGATAAGATGGTCTATACTGGAGTCTCCAGACAAGCAGCGCTCCCTGAATGACATCT  
ACAACCTGGTTCACCACCATGTTCTTCTACTTCCGACACAACACGGCCACATGGAAGAACG  
CTGTCCGTCACAATCTTAGCCTCCACAAGTGTTTTGTGCGAGTGGAGGGAGGCAAGGGGG  
CCGTCTGGACAGTGGATGAAATGGAATATCAAAGGAGAAAGGGACAAAAATACCACAGG  
GATCATCATGTGAAATGGCTGGCACCCCTACTCCTTATTTTCGTCCAGAGGAACCTTGA

#### **FoxP3-2 (FM883711)**

ATGCCACAGACTGAGAGTGAGAGGTTGAAGAGTGGGCGGCTGAACAGTGGTAGACAGCAG  
CAGCAGCGAGATTGGCGGGGTGAACACGGAGAAGAGCCAGGCACACGTACCAAGCCAAA  
TGATTCTGTCTCACCTCGGCTCTATGCTCGTACCTCTGTTACTCAGATGGGTTTCCCATTTGAT  
GATTGGATCTGGAGGTCCACTTATGGCCTCATCTCAGCTCCAGAACATACTGTTACAGCAG  
TGTTCCAGTGAGGAAGAGGGGAGACCTTTGCTGCAGCGGGTGTTTCGGTGCCCCCAGTTGA  
GCCAGCACAGACCCTCTGTCTACGCCAGGCTGTCTGGCTGCCACGTACGACCACAGAC  
GGCCGGTTCAGCTCAACCCATATCACCGTGCAAGGTGGAGGTGGACACAGGGAGCCGTGG  
ACAGTCCTCACCCCCACACTCTGAGCACTCTCCTGGGCCCACTCGTCACCCCTCTCCCCTGA  
GGAGAGCCAATCCTAAGCAGAGCTCCATCATCACCAGGCATAATGAGCCAGGTCACCCAA  
CCCTACGGAGCTCCAGTGCTCTGTTTCTCAACGGACTCTGCTGCTGGCCAGGCTGCGATGC  
GGTATTTGAAGAATTTCCACGTTTTTTGAAACACCTCCACTCTGACCATGGCCATGGAGAC  
AGAAGCATTGCACAGTGGAGGGTACAACAAGACATGGTGCAATACATGGAGACCCAGCTG  
ACTGTGGAAAAACAGAACTCTTTGCAATGCAACTCCATCTGCACCTGTCTGAACACAAAT  
CAACTGACATGAAGGCAGGTTTCAGATTGGCCCTACAGTCACAGCCTGGCACTAGTCCTGCC  
CCAGTACTCATCCCCGGCCTTGGCAGCAGATGGAGTGCCACGCTGCTCCACTAAAGAGCCA  
GAGGAGCTGGCACAGCATGAGCAATGGCCCCGCTGCCGCTCCCCACCATCTACTCCCAGATC  
TTGTCCCGAGTGTTGAGTGTTACAAATACAACAACATCCGGCCTCCGTACACCTACGCCTG  
CCTGATAAGATGGTCTATCCTGGAGTCTCCAGACAAGCAGCGCTCTCTGAATGACATCTAC  
AACTGGTTCACCACAATGTTCTTCTACTTCCGACACAACACGGCCACATGGAAGAACGCTG  
TCCGTCATAATCTTAGCTTGACACAAGTGTTTTGTGCGAGTGGAGGGAGGCAAGGGGGCTGT  
CTGGACAGTGGATGAAATGGAATATCAAAGGAGAAAGGGACAAAAATATCACAGGGATC  
ATCATGTGAAATGGTTGGCACCCCTTCTCCTTATTCGGTCCAGAGAAGAACCTTGA

#### **IL-10 (AB574339)**

ATGTCTCCCTGCTCTCTCCTCCTGTCCCTGCTGTTGGCTGCAGCGCTGCAGTGTGAGCATG  
CCCAGTGCAGACGTGTACCGTGCTCCGACCGCTGCTGCTCCTTCGTAGAGGGCTTCCCCGT  
CAGACTGAAGGAGCTCCGCACCGCCTTCTCCACCATCAGAGACTACTACGAGGCTAATGA  
CGAGCTGGAGACATCCCTGCTGGACGAAGGGATTCTACACCACTTGAAGAGCCCCGTGGG  
GTGTCACGCTATGGACAGCATCCTGAAGTTCTATCTCGACACGGTGCTGCCACCGCCAT  
GAACAACAGAACACAGAACAAACGACTTTAAATCTCCCATCGACTCCATCGGAAACAT  
CTTCCACGAGCTGAAGAAAGAGATCGTCCAATGCAGGAACCTTCTCCTGTAAGAAACC  
GTTTGACATCAACGAGTTCATCTCCTCGTATGAGAAGATGCAGGATAAAGGCCTGTATAA

GGCAATGGGAGAGCTGGACCTACTCTTCAACTACATCGAGGAGTACCTGGTCTCTAAGAG  
ACGCAAACACTGA

**TGFβ-1a (KF870471)**

ATGAGGGCAGTGTGTTTGATGCTGACTGCCTTATTGATGCTGGAATATGTGTGCCGGAGT  
GACACCATGTCCACCTGTAAGTCTCTGGACTTGGAGCTGGTGAAGAGGAAACGTATTGAG  
GCCATCCGTGGACAGATATTGAGCAAGCTGCGGCTACCTAAGGAGCCAGAGATTGACCA  
GGAGGGAGACACTGAGGAGGTCCCAGCTTCCCTGATGTCCATCTACAACAGCACAGTGGA  
GCTGAGTGAGGAGCAGGTGCACACGTACATACCGTCCACTCAGGATGCAGAGGAGGAGG  
CATACTTTGCAAAGGAGGTCCACAAGTTCAACATGAAACAAAGTGAGAACACCAGTAAG  
CACCAGATTCTCTTCAACATGTCTGAGATGCGGTCAGTATTGGGGACTGATCGACTGCTCT  
CTCAAGCTGAGCTCCGCCTCCTCATCAAGAACCATGGCCTGCTCGACGACAGCGAGCAGA  
GGCTGGAACCTCTACAGAGGAGTTGGCGATAAGGCACGTTACCTGAAGTCCCATTTTGTCT  
CCAAGGAATGGGCCAATCGCTGGGTGTCCTTTGATGTAACACAGACTCTGAATGAGTGGC  
TGCAAGGGGCTGGAGAGGAGCAGGGATTCCAATTGAAGTTGCCTTGTGATTGTGGGAAAC  
CAATGGAGGAATTCCGCTTCAAAATATCAGGGATGAACAAGCTGAGGGGAGATACAGAA  
ACACTAGCCATGAAAATGCCATCAAAGCCTCACATTTTACTGATGTCACTTCCTGTGGAAC  
GCCACAGCCAGCTTAGCTCTCGGAAGAAACGACAAACCACTACTGAAGAGATCTGCTCAG  
ATAAATCGGAGAGTTGCTGTGTGCGAAAACCTTTACATTGACTTCCGTAAGGACCTGGGCT  
GGAAGTGGATCCATGAACCCACTGGCTACTTTGCTAACTACTGCATCGGCCCTGCACCT  
ATATATGGAACACAGAAAACAAGTATTCCCAGGTACTGGCTCTGTATAAGCACCACAACC  
CCGGAGCCTCTGCCCCAACCTGCTGTGTTCCACAGGTCTTGGAGCCCCTACCCATTATCTA  
TTATGTGGGGAGACAACACAAGGTGGAGCAGTTGTCCAATATGATTGTAAAGTCCTGCAG  
GTGTAGCTAG

**TGFβ-1b (NM\_001281366)**

ATGAGACTGGTGTGTTTGGTCCTTACGTGCCTGGCGGCGCTGTGCTTGGCGGGCAGCGTG  
AGCAGCATGTCCACCTGTAAGACTCTAGACCTGGAGCTGGTTAAGAAGAAACGCATCGAA  
GCCATCAGGGGACAGATCCTCTCCAAGCTGAGGATGCCCAAGGAGCCGGAGGAGGAGCA  
GGCGGGAGCAGGGAAGGAGATCCCTGTAGCGTTGCTCTCTCTCTACAACAGCACCGTGGA  
GCTCAGTGAGGAGCAGAACTACAGCCACAGCCCACCGCACACACACTGGATGAAGAGG  
AGGAGTACTTCGCCAAGGAGGTCCACAAGTTCACCATGAAGCAGGATAAGAATGTCACC  
AAGCACCAGATGCTGTTTAACCTGAATGAGATGAGGTCCAGCATTGGGGACTACCATCTA  
CTCTCCAGCGCTGAGCTCCGCCTGCTCATCAAAACCACTAACATCCCGTCTGGCAGTGAG  
CAGCGCCTGGAGCTCTACAAGGGGCTGGGCGACAGCAGACGATACCTGGGATCACGCTTC  
GTCACCAACAAGTGGAGTGACCGCTGGCTGTCTTTCGACGTCCTGAAACCCTCAAGGAA  
TGGCTGAAGGGGACCGAGGAAGAGCAGGGCTTTGAGTTGAAGCTGTACTGTGAGTGTGG  
TAAACCCATGGAAAAGTTCTCTTTCAGTATCTCCGGGTTGGACAGCGGGGTACGAGGTGA  
CGTGGCTGGTCTAGCCAAGAACATGAGGAAGCCTCACATCTTGGCCATGTCCATCCCCCA  
GAACTACAGCTCACAGCTCACCTCCTCGCGTAAGAAACGGGCCATCGCTACAGACGACAC  
CTGCACAGATAAAACAGAGAACTGTTGCGTGAGGAACTCTACATCGACTTCAGGAAAG

ATCTGGGCTGGAAGTGGATCCACCAGCCAAAAGGTTACCATGCCAACTACTGCATGGGCT  
CATGCACCTACATCTGGAATGCTGAAAACAAATACTCTCAGATCCTTGCCCTGTACAAGC  
ACCACAACCCAGGAGCGTCGGCCCAGCCGTGCTGTGTACCCCAGGTCTTGGAACCTCTGC  
CAATCCTCTACTACGTAGGGAGACAACACAAGGTGGAACAGTTGTCCAACATGATTGTGG  
AGAGCTGTAAGTGCAGCTAG

*Th2-Signature Genes*

**GATA3 (NM\_001195792)**

ATGGAAGTATCCGCGGACCAACCCCGATGGATGAGCCATCACCACCCATCGGTGCTAAAC  
GAACAGCATCCCGGCTCGCACCACCCGGACCTCGGCCACTCGTACATGGACCCCTCGCAG  
TATCCCCTCGCCGACGATGTGGATGTACTGTTTAATATCGACTCACAGGGCAACCACGTAT  
CTCCATACTATGGGAACTCAGTCAGAGCCGTCCAGAGGTATCCACCTCCTCCACATAGTA  
GTCAGGTGTGTGCGCCCTCTCTACTGCACGGCTCTCTGCCGTGGCTGGACGGAAGCAAAG  
CAATGCAGCACCACAGCACTTCCCCATGGAACCTGAGTCCTTTCCAGAAGAGCTCACTGC  
ACCACGGTTCCCCGGCAGGTCTCTGTCTACCCTTCGGCGTCCTCCTCCTCCCTGTCCGG  
GGGCCACTCCAGCCCGCACCTCTTCACCTTTCCCCCCTCCTCCGAAAGACGTGTCCCCG  
GACCCAGGCATCTCCACTCCGGGCTCAAGCAGCAACAGTCGCCAACAGGAGGAGAAAGA  
GTGCATAAAGTACCAGGTGTCCCTGGCCGAAAGCATGAAACTGGAGTCTCACAGCCGGA  
GCATGGCATCAATCGGAGCGCAATCCTCCGCACACCATCATCACCCCATCGCCACATACCC  
ATCCTATGTCCCGAATACGGCCCAGGCCTCTTCCCACCAAGTAGCCTGATAGGTGGGTCA  
TCTTCTAGTTATGGTTCCAAAACAAGACCAAAAACAAGGTCATGTTTCAAGAGGTAGAGAGT  
GCGTTAACTGTGGAGCTACGTGACCCCGCTCTGGAGGCGGGATGGCACTGGTCACTATTT  
GTGTAACGCCTGCGGACTCTATCACAAGATGAACGGGCAGAATCGGCCCCTCATCAAACCC  
AAGCGACGACTGTCTGCAGCAAGACGCGCAGGAACATCATGTGCAAACGTGTCAAACGAGC  
ACGACAACACTGTGGCGAAGAAACGCCAACGGGGACCCCGTGTGTAACGCTTGCGGTCTA  
TACTACAAACTGCACAATATCAACCGACCTCTCACCATGAAGAAGGAGGGCATTTCAGACC  
AGGAACAGGAAGATGTCCAGCAAGTCGAAGAAGAGCAAAAAGTCCCACGACAGCATGGA  
CGACTTCTCCAAGAGCCTGATGGAGAAGAGCAGCTCGTTCAGCCCCGCCGCTCTGTCCCGC  
CACATGTCTCCTTCCCCCCTTCTCACACTCCGGCCACATGCTGTCCACCCCCACGCCCAT  
GCACCCCTCCTCCTTCGCCCCCTACCCCCACTCCAGTATGGTCTCTGCCATGGGCTAG

**STAT6 (CDQ66037, FR904526)**

ATGGCACAGTGGACGCAGATGAAACAGCTGATCCCCTATCTGGCCACACAGATCCTCAAC  
GAGCTCTACTCCCCCTCCTTCCCCATGGACGTCAGGTGCTACCTGGCCAACTGGATCGAGG  
AGCAGAGATGGGAGGACTTTGAACCAGAGAAGGTAGACCAGGAGCCCCAGGCTCTGACC  
CTGCTCGATCAGATCATATCCTGCCTACAGAATCTAGCCGGGCAGAACCCCAATGTGGTG  
GAGAGGATGAGGCTGCAGCGTATCTCCAGGAACATGAATATGTTCCGTTCCCAACCTTTC  
CAGCTGGTACTCACAGTCAGGGATGTCCTGAGGAAGGAGAGAGAGCTGCTCAGTCAGGC  
GTCTACCCAGTTCCCGGCCCTAGCCCGCTTCTCTCAACCCCCAGCCCAGGATTCCATGGCT  
GCAGCGCCCCCTACCAGAGACGTGGACCTGCTTGTGCTCAAGGTGCTTGAGATCCAGGAC

TGCAGACAGCAGATCCACCAGCTGCAGGAGGAGCTCAACTGGGAGAGGCAGAACTATGA  
GTCCATGCAGGGCACTCTCCAGCAGACGCAGACCAATGGGATGGACACCAGCATGTCAG  
AAGTCACCAAACCTCCAGACTAACATCAAACAGCATGAGTACAATGGCCAAGTCATAGCC  
AAGAAGCGTGTCCAGCTGCTCCAGGAGGCAGTGTCTAGTCTGGAGAAGTGTCTAGTCTCGT  
CTGATCAACAGTATCAAAGCCTGGAGGTGGGAACAGCATCAAGCTACTATTGGACACCCC  
TTCGATGACAACCTCAGCCCTCTGCAGACGTGGTGTGAACAACTCCTGGGGGTGAACGGG  
AAGTTGAGACAGGAAGTGATGCTGGCCGGGGAGCCAATCCCAGAGCTGCAAGAGAGACT  
GGGACGTTTGCTGCAAACCTCTAATCCAGAGCTCCCTGATGGTGGACAAGCAGCCTCCCCA  
GGTGATTAAGACCCAGTCTAAGTTCTCCACCACGGTGCGCTACCTGCTGGGGGAGAAGGT  
GGCACCCGGGAAACCAGTCCTCTTCAAGGCCAGATCATCACTGAGGCCAGGCTAGGAA  
CCTCGGACAGCTGGGCAGCTTACCCAGTGAGAATGTTGGAGAGTTGATCAATAACACAGC  
CATTTTGGAACACAACACTTCCGGCAAGAGTACATGTGCCACCTTCAGGAATATGTCTAT  
AAAGAAGATCAAGCGAGCAGACAGAAAAGGGTCAGAGTCTGTTACAGAGGAGAAGTTTG  
CTCTCTTCTTACCACAGAGATCAGCATCACTGGCTGTGACATTCCCTACAGAATACAGAT  
GATCTCTGTGCCGGTGGTGGTGATCGTTCACGGTAGTCAGGATAACAATGCCCTAGCAAC  
CATCATCTGGGACTGTGCCTTTTCTGAACCAGAAAGGATTCCGTTTTTGGTTCCGGAACGC  
GTTCCCTGGAAGCAGATGTGCAGGACCCTCAACAGTAAGTTCATGTCGGAGGTCGGGACG  
CAGCGTTGCCTAGACAACTACAACCAACATTTCTGCCCCAAAAGATCTTCGACAAGCCA  
GACATCGCTGGAGACTACAGCAACATGCTGGTATCCTGGGCACAGTTCAACAAGGAGGTG  
CTCCCTGGACGACCTTTACCTTCTGGCAGTGGTTTGATGGTGTGATAGAGCTTACCAAGA  
AGCACCTGAAGAGCTACTGGAGTGACGGGTTGATATTTGGTTTCATCGGTAAGCAGCACC  
TCCACCTGATTCTGAAGGACCGGCCCAACGGGACCTTCTTACTGCGCTTCAGCGACTCTGA  
GATAGGAGGCATCACCATTGCATACGTGGCTCCATCAGAGAACGGGGGCCAGAAGATCC  
AGAATATTCAACCGTCCACCAAGAGAGACTTGGAGATCCGTTCCCTTGGTGACCGTATTC  
AAGACATCGACTTCATCACACACGTTTATCCAGATCTGCCGAAGAATGACGTGTTCAGAA  
AATACTACACAGGCAAGTCGCGCGCGCACACACACACCACCACACACACACACACAC  
ACACACACACACACACACACACACAAACAGACTTCACAAGGGACCAGGGGAATGGAGCC  
AGTGCATCACCATTCTACTCTCTCTCTCCGAACAACCAGTTCCAAACCCCCTTCCAGCTGG  
CCCCAGTACCCCTACAGGGGGGGGATGTATCCTGACCCCCTCTCCAATCCCAATGGACTCTT  
TCCTGGCTCGGACATGTGAGTGA

**IL-4/13A (AB574337)**

ATGAAGACGGCGATCCTTCTCCTCTCTGTTGCGATGGTGCTATTTGACTCTGGAACTCTGC  
CTGCCAACGCTGCAGCGCACCGGCAGCATAGAAGTCACAATTCCAATTTAGAGGGCAATTA  
TTAGCATGGCAGGACAATACACACACACTCTGTCAGAGGAACTTCTGGAAACATTACTCA  
TAGATGTAACACATTTGACTGCGACCACCACAAAGTGCAAGGAGTTCTTCTGCGAAGCTG  
AGACAATCTTGGCCTCCGTGAAAAATGACGCGTTTGGTGAGGAGGGAAAGATTGTCCGAC  
ATCTGAGGGTTTACAACAACTTCAGAAGTGCACCGTTGTGAAGAGCCAAGACCAGGTGG  
AGGGCAACCAGGTAGAGCTGAGGAGACTTCTCCTCGACCTAAAAGAATGTGGCCAAAAA  
ATCAACTCCAAACCATGA

**IL-4/13B-1**

ATGAAGACTCTTGCTCTCCTCTTCTCCTTTGCATTTGTGCTGGTCTTCACTGCGCCCACTAA  
GACACCTGATGAGATTCATCTACTGCAGAGGATCATGAAAGAGGCTAACAAGACGCTCA  
AGGAAGGCCCGGAGGCCCTTTTGAACCATCTAGTGCCAGCGGAATTCAAGCAAGATCGCT  
GCAAGTCACACGGGCCTAAAGATTTCTGCATAGCGGAGACGATTCTGTCTAACATAAACA  
AAACGCAGTACGGGACTTCAGACAACAACATAGAGACAATCAGCAGAGTGCTGGAGCAG  
TACAATAAGCTTCACCCCTTCCAACCTGCACTATGAAGACGAATGGAGACGAGGAACAGCTC  
CGTGCTCTCCTGATGAACCTCTACAACCTGTGCCCAAGCCATCTATTCCCGTCCCCACCCTG  
TCACTCATCACAAAACGACCCCAGCACTTTGA

**IL-4/13B-2**

ATGAAGACTGTCGCTCTCCTCTTCTCCTTTGCATTTGTGCTGGTCTTCACTGCGCCCACTAA  
GACATCTGATGAGACTCATCTATTGCATATGATCATCGACGAGGTTAACAAGATCCTCAA  
AGGAGGTCTGGAGTTTCAGGCCCTTTTGGACAGTCTAGTGCCGGCGGGATTTCGATCAAGA  
TCGCTGCAGGGCAAACGGGCCTAAAGATTTCTGCATAGCTGAGACTATTCTGTCTGCCAT  
AAGCCATACGAGGCACAGGATTCCATTTAACAACATATCTAAAATCAGTAGAGTGCTGAA  
GCAGTACAATAAGTTTCATCCAACCAACTGCAATGTGAAGGAGAACGGTGATGAGGAAC  
AGCTCCACGATCTCCTGACAAACCTTGTCAACTGTGCCAAGGTCATCTACTCTCGTCCCCC  
TCCCTGCCGGTCTTCACAAACAACCCTAGAGCTTTGCTGA

**Atlantic salmon***Th1-Signature Genes***T-bet (NM\_001199226)**

ATGGGCGGCATAGGTGGCAATCTTTACCTCAGTATGTTGAATGGGACTGATACGCAAACCT  
TTCGAAAAGACACCGATATCAACAATCACCTTCAACGCAGAAAGAATTCCGTGGATTTT  
AAAATGGGAATTCAGGACACCAGATTATATCACCAAGACTCAATTCAAAACGGACAGGA  
CGGATCGGCACTGCCGTACCACGCAGACCAAACCTGTGGCTGGATACGGAGCGCAACCCG  
GGAGGTTTTACTACCAACTCCCCACAATAGCTGCCATTTTCAGCAGTGTCCGGTCGCCGAC  
TAGAAACGGAACGGGACAGACTTATTTACCAACGGGAAGCGAAGGTTTTCTCGACAATA  
GCAAAGAAGTTTACCCTGCCTCTGCGGAGAGTTATCCCGCACCCGTTCAACATGGGTACT  
ATCGCGCGCCACTCTACCCGTTACCTGGGCTACAGGTGTGCGGGAAGACGCAGGCTCTCC  
TCAACAACCTATCCTCTGTGGGCGAAGTTCCACAAATATCAAACCGAAATGATCATAACGA  
AACAGGGGCGGAGGATGTTCCCTTTCCTGAGTTTCAACATCAGCGTTCTGGACCCGTCAG  
CCCACTACAATGTGTATGTGGACGTGGTCCTATCCGACCAGCACCACTGGAGGTACCAGG  
GAGGCAAGTGGGTCCAGTGTGGCAAAGCAGAGGGTAACATGCCAGGGAACAGGAGGTAT  
ATGCACCCAGACTCCCCAACACAGGGGCTCACTGGATGAGGCAGGAGGTGTCCTTTGGC  
AAGCTCAAGCTCACCAACAACAAGGGCAGCGCCAACAACGTGGGGCAGATGATCGTTCT  
GCAGTCGCTTCATAAGTACCAGCCACGGCTGCACATCATCGAAGTGAAGGAGGATGGTTC  
TGAGGACCTCTTCCTCACCGCCAAGGCCCAGACCTTCGTCTTCCCAGAGACCCAATTCATA

GCCGTCACAGCCTATCAGAACGCAGACATCACCCAGCTGAAAATAGACCATAACCCCTTT  
GCTAAAGGTTTCCGGGACAATTATGACGCGCTGTACGCACCGCCTGACTCGGACCGTGTC  
ACCCCTCTCCCACCGAGGGCCAGCAGCTTTTGGCAGGTACCTGCTATACCCAGGGGTAC  
CTGATGGACCAGTACATGAACCCTCTGCCCCAGAACCGCTTCTACAGCCGGGAGCACATG  
GCAGCCATGGGCCATCAGACCAAAGACCCCTCAGCCAGCCCCACAGCCGCTGGTACCTC  
TCCCCCAGCAAAGTGTACCTCCAACCGGCTGGACTTCAACTCCTATGAGGGTGACTTCT  
CCAGCAACAGCTTCTACAAGCCCTTCCCCCTGCAGACATCGGCCACCACACGCTGAGCT  
ATTATGAGGACAGCCCGTTCGCCACGGCCAGCGGATCCGTCTCAGGAGCCTCCTCGGCAG  
CCTGGAGCACCGGCCGGCCCTCCCTCAGTACCTCAACCATCCCTGTCCCAGTAAAGTCG  
GCCCCAGTCTAGGCTGGTTCAGGCCTGTGTCCTCTACCTCTCCAGGTACCCCCAGGCTCCA  
CCCCCGTCCCTCCTGGAGCCACTCCGCCCCCACCATCGCTGCAGGACAAGCCCAAGGA  
GGCGGGGGTGGGGGGAGAGGACCCCTGGCTGGAACCCCCCTCGGTCAAATCGGTGGACT  
CTGCTGACTCCGGCCTGTTTGAGGGCGGGGCAGAGGGCAAGAAGCGGCGAGTGTACCCCT  
ACGCTTCCAGCACGGAGAACTCGCCGCCACCCGCAGCGTGGAGGTCTGTGAAAAGGACT  
GCGGTAGTGATGCCGGCTACTACGGCTTTTATTCCCACTGA

#### **STAT1 (BT045567)**

ATGGCCCAGTGGTGCCAGCTGCAGCTACTGGAGTCTAAATACCTGGAGCAGGTTCGACCAG  
CTCTACGATGACTCCTTCCCCATGGACATCAGACAGTACCTCAGCAAGTGGATTGAGAGC  
ATCGACTGGGAAAATGTGGCTGTTTCAGGACTCCTTAGCAACAGTACGTTTCCATGACCTC  
CTAGCCCAGCTGGATGATCAACACAGCCGCTTCGCCCTGGAAAACAACCTTCTGCTACAA  
CACAACATCCGCAAGATCAAGAGAAACCTCCAGGACCACTTTCAGGAGGACCCTGTTTAC  
ATGGCCATGATCATCTCCAGAAACCTGAAGGAGGAGCAGAAGATTCTGGCTGCTGCCAAA  
AGCATAGAGACCGACAGAGAAAACACACAGACTAGCATGGTTCTGGAGAAACAAAAGCT  
GGACAACAAAGTCAAAGACATGAAAAACAAGGTTTCAGGAAGCGGATCAGAATGTGAAGT  
CTCTGGAATACCTTCAAGACGAGCATGATTTTAAGGAAAATACTCTTAAGAACAGAGAAC  
ATGAAATGAACGGGCTGACACAGAAACAGCTGGAACACGAGAAGTTGCAGATTGCAGAG  
ATGTGTTTCAAGCTGAAGTTCAAGAGAGGGGAAGTGGTTGGCCAGTTGGCGGAGGTGCTC  
AACATTGCCGAGGCGGTCCAGTCAGACCTGATCTCAGAGGAGCTGGCGGAGTGGAAGAA  
GAGGCAGCAGATCTCCTGTATTGGAGGACCACCAACGCATGTCTGGACCAACTGCAGAA  
CTGGTTCACAGCGGTGGCGGAAAGCCTGCAGCAGGTGAGGCAGCAGCTGAAGGAGCTCC  
AGGAACTAGAGCAGAAGTACACATACGACAACGACCCAATCAAACAGCAGAAAGGCTTC  
CTGGAGGGGGCGGGCCCTGTCACTGTTCCGGAACCTCCTAGAACATTCTTGGTGGTGGAG  
AGACAGCCCTGTATGCCCACACATCCACAGAGACCTCTGGTGCTGAAGACACAGGTGCAG  
TTCCTGTCAAGCTCAGATTTCTTGTGAAGCTCCAGGAATTCAATTATCAACTCAAAGTGA  
AAGCTTTGTTTGACAAGGATGTTACAGAAAAGAAAGGGTTTCGTAAGTTCAACATATTGG  
GTACCAACACAAAAGTTATGAATATGGAGGAGTCAAATGGAAGCTTGGCTGCAGAGTTTC  
GCCATTTGCAACTGAAAGAGCAGAAAGTAGCCGGCAACAGAACAAATGAGGGGCCTCTC  
ATTGTGACAGAGGAGCTACACTGCATCTGCTTTGAATCTGAACTCAACCAGTCAGGTCTT  
GAGCTCAAGCTAGAGACCATCTCACTGCCCATCGTGGTCATCTCCAACGTCAGCCAGTTG  
CCCAGTGGCTGGGCCTCCATCCTGTGGTACAACATGCTGACCAGCGAGCCCAAGAACCTG

AAGTTCTTCCTGAGCCCTCCTGCAGCGTCCTGGGGTCAGCTGTCTGAGGTGCTGAGCTGGC  
AGTTCTCCTCTGTACCAAGAGGGGACTCAATGAAGAGCAGCTAGGCATGCTGGCTGACA  
AACTACTGGGCCAGAAAGCACAGAGGAATCCTGAGGGCCTTGTCCCCTGGACCAAGTTCT  
GTAAGAGTCTCAGTGAGAAGAGCTTTCCCTTCTGGCTGTGGATCGAAGCTATCCTGGACC  
TCATCAAGAGACATCTGCTGTCCCTGTGGAACGATGGTTGCATCCTGGGCTTTGTGAGTAA  
GGAGAGGGAGAAGGCCCTGCTGACTGGGAAGTGTCCAGGCACGTTCTTGCTGCGCTTCAG  
TGAGAGTAGCAGAGACGGAGCCATCACATTCACCTTGGGTGGAACACGACCAATACGATA  
AGCCTGTATTCCATGCAGTGGAGCCCTACACCAAGAAGGAGCTGTCTGCCGTCTCTCTGC  
CTGACATCATCCGCACCTACAAGGTGATGGCAGCTGAGAACATCCCAGAGAACCCACTCC  
GCTTCCTCTACCCAGACATCCCCAAAGACAAGTCCTTCGGAAAGTACTACGCTAGGGCCT  
CAGAGGCATCGGAGCCTATGGATGTGGAGAGTTCCAGCAGCACAGGATACATGAAGACA  
GAACTCATATCAGTGTGAGAAGTTCACCCCTCTAGACTGCAAGACAACATGATGCCCATG  
TCGCCAGACGTGTTTCGGAGAGTTGAAGAGGAGCGTTGCGCCAGTGTTCCAGTGTTGGACT  
GGTCCTAAGGAAATTGATGCTGTGGCGTCTGATCTCGGAGAGTTTTTAGCTGAAGAATTC  
AGATGTTTGAGAACACACCTGACTTGGACCGCAACTGA

**STAT4 (NM\_001173670)**

ATGAGTCAATGGAAACAAATTCAACAGCTCCAGATCAAATACCAGGAGCAGGTGGGCTA  
CCTTTATGATGACAACCTCCCTATGGACATACGGCAGGTGCTCTCCAACCTATATTGAGAGC  
CAGGACTGGGATACTGCCGCAAACCATGAATCCATGGCGACAGTTCTCCTCAGCAATCTC  
CTGTCTCAGCTGGACAGGCAGTGTTCTCAGGAACAGAACTTCCTACAAAGACACAACCTTG  
AAGTTCATCTACCAGCAGTTACAGACTAAATGCAAAGCCAGCCCTCTGCTGATGGCTGGG  
GTCATTTCTTCTTGCCTCAGAGAGGAGCGCCGTATCATCTCCACAGCCAGCATTGAGGAAC  
AGGGCCCATTGGAGAAGTCAATGCAGAATTCGGTGGCCTTCGAGAGACAGAGAAGAACATG  
GACAACAGGGTGGCGGTGATCAGGAGTAGTGTGCAGATGATGGACCAGGCAGTGAAATA  
CCTAGAAGACATGCAAGACGACTTTGACTTCCGCTATAAACTCTCCAGTCTCGAGATCC  
AGTGGACAGGAACACAGCGGTAATGAAACAGGAAGTGACCCGACTGCAGGAGATGCTCA  
ACAACCTGGACTTTAAGAGGAAGGAGAACCTATCTAAGATGAGTGACGTGATAAAAGAG  
ATTGATGCTCTGATAGTCTCCAGCTGAACCCAGAGCTGATGGAGTGGAACGCAGGCAG  
CAGATCAACTGTATAGGTGGCCCACTGCTCACTGGACTGGACCAGCTCCAGAACTGGTTT  
ACTCTGACAGCCCAAAGTCTGTTCCAGATGAAGCGTCAGCTGGACAACTGGGGGAGCTT  
ATATTAAAGGTGACATATGAGAGCGACCCCATCCCCTGCAGAGACCGCAGATGGAGGA  
GCAGGTCAAATACCTCATCTACCACCTCATCAAAAGCTCCTTTGTGGTGGAGAAGCAGCC  
ATGTATGCCAACCCACCCCAAGAACTCTCATCATCAAGACCGGGGTGCAGTTCACCAC  
CAAAGTCAGATTGCTGGTCAAACCTTCAGAGGTGGATTACCAACTAAAAGTGAAGACAAT  
ATTTGACAAGGACCTCCCCCTGGCAGAGTAAATCGTCAGTTCTTCATCCTGACTACCACC  
ACCAAAGTAATGGACGTGGAGGAATCATCCAATGGCTGTCTGTCTGTAGAGTTTAGACAC  
TTGCAGCTGAAAGAGAAGAAATACGTTAATGGAACCAAGGTGAACGAGGGTCCTGTCTCT  
GTGACGGAGGAGCTCCACTCCCTCAGCTTTGAAGCCCAGTTCAACATACAGGGCATTAAC  
ATCGACCTGGAGACCTGCTCCTTTCTCTGGTGGTCATCTCCAATGTTAGCCAGCTGCCTG  
GAGGCTGGGCATCTGTCATGTGGTACAACCTGCTGACTGACGAACCCAGGAACCTGGGCT

TCTTTGCCAGTCCTCAGCGGGCCAGTTGGGGCCAGCTCTCTGAGGTACTGAGTTGGCAGTT  
CTCCACCTTCGCTGGGCGGGGCCTCAACAGGGAACAGCTGTGCATGCTAGGAGAGAACT  
CTTGGGTCAGCAAGTCTCCCAAACGAATGTCAGGTATCCTGGTCCAAATTCTGCAAGGA  
GAATATTCATGGGAAGAATTTTCAGTTTCTGGATGTGGCTGGATTCCATCCTGGAGCTCATC  
AAGAAGCACCTACTTCCCATCTGGAACGACAACCTGCATCATGGGTTTTGTGTCAGTAAGGAG  
ACTGAGAGGGGCGCTCTGAAGGACAAGGAGCCTGGGACTTTCCTGCTGCGCTTCAGCGAG  
AGCCACCTGGGTGGGATCACCTTCACCTGGGTGGAGCAGTCCGATAGTGGAGAGGCCAA  
GTTTCATCTCGGTGGAGCCGTACACCAAATCACGCCTCAGCGCTCTCCCGTTTGCCGACATT  
ATCCGAGACTACAAGGTCATCACAGACGGAGAGGTCCCTGAGAACCCACTAAAGTTCCTC  
TACCCAGACATCCCCAAAGACGAGGCCTTCGGACGACTTTACAACAGCCAGCAGAACAA  
AGTGTTCATACATAACCATCTATGCTGATCCCCATCTCAACTTTGCAAACACACCTCCC  
CCCTGCTCCTCCCCAGAACCCCCCATGTCCCCTGGGATGTTTGACATGCTCACCCAGCACC  
TCAGCCCCTTGAGAGATTGAGACTGCCATGAGATCTCCGTA CTCCGAGTAA

#### **IFN $\gamma$ (NM 001123558)**

ATGGATGTGTTATCAAGGGCTGTGATGTGTTTCTGCTTGATGGGCTGGATGACTTTAGGAT  
GGAGTAATGCCGCTCAGTACACATCAATTAACATGAAGAGCAACATAGACAAACTGAAGG  
TCCACTATAAGATCTCCAAGGACCAGCTGTTCAACGGAAAACCTGTTTTCCCCAAGGACAC  
GTTTGAGGACAGTGAGCGGAGGGTGTGGATGAGTGTGGTTCTGGACGTGTATCGGAGTATC  
TTCAACCAGATGCTGAACCAGACGGGGGACCAGGAAGTGAGGGAGAGGGCTGGACCAGGTC  
AAGGGGAAGGTTTCAGGAGACCCAGAAACACTACTTCCTGAAAAGGATACCTGAGCTGAGG  
ACACACCTGCAGAACCTGTGGGCCATCGAGACCAGTAACACCACAGTCCAGGGGAAGGCT  
CTGTCCGAGTTCATTACCATCTACGAGAAAGCCTCCAAACTGGCCCTTAAGATCCATCTAA  
AGAAGGACAACCGCAGGAAGAGACGGCAAGCCCAGAGGCTCAAATCAAGCATCATGTAG

#### *Th17-Signature Genes*

#### **IL-17A/F1a (KJ921970)**

ATGGGTTCCTACTTCAAACGTACACTTTTTGATGGTGCTGTGTTTAATGGGGTTATTGGAGA  
TGATGATGATGGGTGCAGAGGCAGCCCCCACGTCCATCCAGCGATGACAGGGAGATGCT  
CACAGAGAAACCTTCAGGGACACAATAAGCCTGTAGAGCCTTCAGCTCCAAACACAATA  
ACTGTCCCCCTGCACCTGGACCCGAGCGACTTGATTCCTTCCCGTCTCGTCAGATCCATTG  
GGAACCACTCGATCTCCCCATGGACTACCAACACCACCTATGATGAGTCCCGCTTTCCCCA  
AACCATCTCGGAGGTCAGGTGCTCTCTGGAGGGCTGTCTGAACGTCGCGGGTAAGGAGGA  
CAGAAGCCTGGAGTCCAAACCCATTTACCACCAGATCCTGGTCCTGAGGAAGGTGATGGG  
GAGCGTGGACAGATACTACTACCGGCTGGAGTCAAAGATCATCGTGGTGGGCTGCACATG  
TGTCAGGCCTAGCATTGAGCACCAACAGTAA

#### **IL-17A/F1b (KJ921971)**

ATGGTATCTACTTTAAGCTTCCAGTCTTTGACGGTGCTGTGTATGAAGGGGATGTTGGTGA  
TGATGATGGGGGCAGAGGTGGCCCCCGTGCCCATTCAGAGAAGACAGAGAGCCACACA

CGGACCACACTCCAGACACACAAGAAGCCTACAGAGTCTACAGGTCCCGACACAGTAATT  
CTCTCCCTGCACCTAGACCCAAATTACTTGGTTCCTTTCCATTCCATCAGACCCATTTGGA  
ACCATTCAATCTCCCCGTGGACTTACAACACTACCTATGACGATCGACGCTTTCCCCCAT  
CATCTCGGAGGTCAGGTGCTCTCTGAAGGGATGTCTGAACATCAAGGGTAAGGAGGACA  
GGAACCTGAAGTCCAAACCCATCTTCTACCAGATCCTAGTCCTGAGGATGGTGATGGGAA  
GTGGGAAGAAATGCCACTACCGGCTGGAGTCAAAGGTCATCTCAGTGGGCTGCACCTGTG  
TCAGGCCTACCATCGAACAGTAA

#### **IL-17A/F2a (KJ921972)**

ATGGAGCTCAAAAGCAACGTGTCTGAAGTACCTGGTTGTGTGCTGTGTGTCTATGCTGCTG  
GGCCTGACCATGGCAAAAGGAAAGAAGGGGACAAAGGAGAGGTGTAACGAAACACTGA  
TCATACCTTCAGACTACTACAAGATTCCCACAGAGGAATCAGAGGGAAATGGGAACATTC  
ACACACGCTCTCTGTCAACCCTGGACCTGGAAAACCACTACAGTGGAGAACCGTCTTCCTC  
AGACCATGTGGGAGGCCGAGTGCAGCTCTATGTACTGTGTCTACCCACCAACAGCAGCC  
AGTACGAGCAGAACTCTGTACCTATCTACCAGCAGGTCGTGGTACTCTACACTTCAGCCA  
CCAGGAAGTGCTACAGCGCCACCTTCCTGTCTGTGGCCGTGGGGTGCACCTGTGCCTGGG  
CAAGGACCTCTTGA

#### **IL-17A/F2b (KJ921973)**

ATGTGGAAGACATCAGAGATGGAGCTCAAAAACAACACGTCGAAATACCTGGTTGTGTG  
CTGTGTGTCTATGCTGCTGGGCCTGACAATGGGCAAAGGGAAGGTGGGGGAGAAGGAGA  
GGTGTGAGGACACACTGACCATTCCTTCAGACTACTACAAGACTCCTTCAGAGGAATCAG  
AGGGAAACGGGAACATCAACACACGCTCCCTGTCCGCCTGGACCTGGAAACCCATTACAG  
TGGAGAACCGTATTCCTTCAACCATTTGGGAGGCCAAGTGTAGCTCTATGTACTGTGTCTA  
CCCCACCAACAGCAGCCAGGTCGTGGGCTACCGGCAGAACTCTGTACCTATCTACCAGAA  
GGTCCTGGTGCTCCATATCTCAGCCACTAGGAAGTGCTACAGCGTCTCCTTCCTGTCCGTG  
GCCGTGGGGTGCACCTGTGCCTGGGCTAGAACCTCTTGA

#### **IL-17A/F3 (KJ921974)**

ATGCTTCTGGTCATGGTCTTCAGAGGTTTGCTGGTGCTGGGTCTGATCATGTCGCTGGACG  
GATGTAAGAAAGACCAGAAGACCAAACCTGAAGGCAGCCAAAGGCTCCGGACGAGTCAAG  
GTCTTTGGACGGAGAGTAATGACTGTAGGGTTGGTTCTGGATCCTAACCTGAAGACCGCT  
GTCTTCCCTGTCTTCATATAGCCAACAGGTCTCTCTCTCCATGGACATACAGCGACACAT  
ACGATGAGACCCGAGTCCCTCAACATATCTCCAGGCTCAGTGCCAGAGGTCTGGCTGTC  
TAACCCACAGATGGAGAAGAGGACATGGGGTTGGAGTCCAAACCCATACGCCATCAGACC  
TTGGTGCTCCGCAGGGTTCAGGGAGAGATGGGCAGCAGCGGAGGGAGGAGGAAGAAGG  
GGAAGAAGAAGGGGTATTTCTATAAACTGGAGAGTGAGAGTGTAACGTGGGCTGTACC  
TGTGTTTTGGCCTTTTCGAGGGAGGTTTTTTCCTAGCCACCGTGCTTCTACACCTGCATTGCTT  
GCTGTTTTGGGGTTTTAGGCTGGGTTTCTGTACAGCACTTTGA

**IL-21 (EU816603, ACJ02096)**

ATGAAGCTGCTTGTTTGTGTCTCCTAGCCATCACCTGTTGTGTTTTGGCGAATGCAGACAA  
CGTCGAGAGAACAAATGAAGCTGACTGAAGTACTAAAGGAGTTAAGACAGCTGAACAAAAG  
TGTGGAGCACAAACGGCGTGATGTTGAACACTCCTACCATGGATATAGAGGAGTGCTGTTTC  
CTATCTACCTTGGAGTGCTTCCAGAAGATGGTACCTCGTCTCAAGACCAAACAAAAGAAAT  
TGCAGTGTAAGTTAGCAGAAACCTCAACCCACTGACTTTTACAGGTGTAGACTCCTGCAG  
TCGGGAGGAGAGAGAGAAAAAGTCTGCCAAGGATGTGATTCCTACCCAATGAAGGACAG  
CAGGGAATTTGTACAACAGTTGGAATCTCTTCTTCAAAAGGTAGCAGGTTATTATGAATAA

**IL-22 (AGKD04046435, AGKD04023486)**

ATGAAGTTCAGTTCGGTCCAACCTCGTAGCCGCTGTGGTAGTGGTGATGAGCGTCTGTCTGC  
TGCGCGAATCCGTGGCGCACTCCATCCATCGCCCGCTCAGCGCCCCCTGCACAGCGCGG  
ATACCGACACCATGGTACAGCTGGTGGCTCAACAGGCGCAAAGTTCTGACACTGATACTG  
ACACTAACTGATGCCAGACATCGATACTAAAAAGAACCACAGAGACATCTGCTGCCTGC  
ATGCTAACATCCTGGACTTCTACCTGAGTAACATCCTGACCACTAAGGAGAAGCAGGACA  
AGCATCATCCTAACTCCCTGCCCTGAAGGAAGACCTGGCCCGAGTCAGCAGAGACCTGA  
AGGAACACGGCTGTGCTATTAAACACTACAATGACCACCACCACAGCATTGCTTTCCGCA  
AGAAGTTGGCCGAGATGGAGGAGGGGAAAGGGATAAAGAAAGCCATTGGAGAGATTGA  
CATCCTCTTCACCTTCTGAAAGACTTCTGTGTGCACGCCTAG

*T<sub>reg</sub>-Signature Genes***Foxp3 (NM\_001198847)**

ATGCCACAGACTGAGAGTGAGAGGTTGAAGAGTGGGCGGCTGAACAGTGGTAGACAGCA  
GCAGCAGCGAGATCGGCGGGGTGAACACGGAGAGGAGCCAGACACACGTACCAAGCCA  
AATGATTCTTTCTCACCTCGGCTCTATGCTCGTACCTCTGTTACTCAGATGGGTTTCCATT  
GATGATTAGACCTGGACGTCCACTTATGGCCTCATCTCAGCTCCAAAGCATACTGTTACAG  
CAGTGTTCCAGTGAGGAGGAGGGGAAACCGTTCCTGCAGCGGGTGTCTCGGTGCACCCAG  
CTGAGCCAGCACAGACCCTCTGTCTCCGCCAGGGTGTCTAGCTGCCCACGTACGACCA  
CAGGCAGCGGCCGGTTCAGCTCAACCCATATCACTGTGCAAGGTGGAGGTGGACACAGG  
GAGCCGTGGACAGTCCTCACCCCCACACTCTGAGCACTCTCCTGGGCCCCACTCGTCACCC  
CTCGCCCCTGAGGAGAGCCAGTCCTAAGCAGAGCTCCATCATCACCAGGCATCATGAGCC  
AGGTCACCCAACCCTACGGAGCTCCAGTGCTCTGTTTCTCAACGGACTCTGCTGCTGGCCA  
GGCTGCGATGCGGTATTTGAAGAATTTCCCGTTTTTTTGAAACACCTCCACTCTGACCATG  
GCCATGGAGACAGAAGCATTGCACAGTGGAGGGTACAACAAGACATGGTGCAATACATG  
GAGACCCAGCTGACTGTGAAAAACAGAGACTCTTTGCAATGCAACTCCATCTGCACCTG  
TCTGAACACAAGTCAACTGGCATGAAGGCAGGTTTCAAGATTGGCCCTACAGCCACAGCCTG  
GCACTAGTCCTGCCCCAGAACCCTTCCCCGGCCCGGGCAGCAGATGGAGTGCCACGCTGC  
GCCACTAAAGAGCCAGAGGAGCTGGCACAGCAGGAGTATTGGCCCGCTGCCGCTCCCCA  
CCACCTACTCCCAGATCTTGTCCCGAGTGTTGAGTGTTACAAATACAACAACATCCGGCCT

CCGTACACCTACGCCTGCCTGATAAGATGGTCTATAATGGAGACTCCAGACAAGCAGCGC  
TCTCTGAATGACATCTACAACTGGTTCACCACCATGTTCTTCTACTTCCGACACAACACGG  
CCACATGGAAGAACGCTGTCCGTCATAATCTTAGCTTGCACAAGTGTTTTGTGCGAGTGG  
AGGGAGGCAAGGGGGCTGTCTGGACAGTGGATGAAATGGAATATCAAAGGAGAAAGGG  
ACAAAAATATCACAGGGATCATCATGTGAAATGGTTGGCACCCCTTCTCCTTATTCCGTCCA  
GAGGAACCTTGA

#### **IL-10 (AGKD04000716)**

ATGTCTCCCTCCTCTCTCCTCCTATCCGTGCTGCTGGTTGCAGCGCTGCAGTGTGAGCATGCC  
CAGTGCAGACGTGCACCGTGCTCCGACCGTTGCTGCTCCTTTATAGAGGGCTTCCCCGTCAG  
ACTGAAGGAACCTCCGCACATCCTTCTCCACCATCAGAGATTACTATGAGGCTAATGACGAGC  
TGGAGACTTCCCTGTTGGACGAAGGCATTCTACACCACTTGAAGAGCCCGGTGGGGTGTAC  
GCTATGGACAGCATCCTGAAGTTCTACCTCGACACGGTGTTGCCACCGCCATGAACAACAG  
AACGCAGAACAAACCACTTTAAATCTCCCATCGACTCCATCGGAAACATCTTCCACGAGCTGA  
AGAAAGAGATCGTCCTATGCAGGAACACTTCTCCTGTAAAGAAACCGTTTGACATCAACGA  
GTTTCATCTCCTCGTATAAGAAGATGCAGGGTAAGGGCCTTTATAAGGCAATGGGAGAGCTG  
GACCTGCTCTTCAACTACATTGAGGAGTACCTGGTCTCTCAGAGACCCAAACACTGA

#### **TGFβ1 (BT059581)**

ATGAGGGCAGAATGTTTGACGCTGGTTGTCTTATTGGCGCTGGAATATATGTGTGCGGAGTG  
AAGCCATGTCCACCTGTAAGTCACTGGACTTGGAGCTGATGAAGAGAAAACGCATTGAGG  
CCATCCGTGGACAGATACTGAGCAAGCTGCGGCTGCCCAAGGAGCCAGAGATTGACCAGG  
AGGGAGACTTCGAGAAAGTCCCAACCTCCCTGATATCCATCTACAACAGCACAGTGGAGCT  
GAGTGAGGAGCAGGTGCACACATGCATACCACCCACTCAGGATACAGAAGAGGAAGCATA  
CTTTGCAAAGGAGGTCCACAAGTTCAACATGAAACAAAGTGAGAACAACATTAAGCACCA  
AATGCTCTTCAACATGTCTGAGATGCGGTCTGTATTAGGGACAGATCGACTGCTCTCTCAA  
GCTGAGCTCCGTCTCCTCATCAAAAATCGTGGCATGCAGGACAGCAGCGAGCAGAGGCTG  
GAACTCTACAGAGGCGTTGGAGATAAGGCACGTTACATGAAGTCCCATTTTATCTCAAAGG  
AATGGGCCAATCGCTGGATCTCCTTTGATGTTACACAGACTCTGAGGGAGTGGCTGCAAGG  
GGCTGGAAAGGAGCAAGGATTCCAATTGAAGTTGCCTTGTGATTGTGGGAAAACAATGGA  
AGAATTCCGCTTTGAAATAGCAGGGATGAACAAGCCCAGGGGAGATAAAGAAACTCTCTT  
CATGAACATGCCAAAGCCTCACATTTTACTGATGTCACTTCCTGTGGAACGCCACAGCCAG  
CTTAGCTCTCGGAAGAAACGACAAACCACTACTGAAGAGATCTGCTCAGACAAATCGGAG  
AGTTGCTGTGTGCGAAAGCTTTACATTGACTTCCGTAAGGACCTGGGCTGGAAATGGATCC  
ATGAACCCACTGGCTACTTTGCTAACTACTGCATGGGCCCTGCACCTATATATGGAACAC  
AGAGAACAAGTACTCCCAGGTACTGGCTCTGTATAAGCACCACAATCCTGGAGCCTCTGCC  
CAACCTTGCTGTGTTCCACAGGTCTTGGAGCCCCTACCCATTCTCTACTATGTGGGGTAGACA  
ACACAAGGTGGAGCAGTTGTCCAATATGATTGTTAAGTCCTGCAAGTGTAGCTAG

*T<sub>H</sub>2-Signature Genes***GATA3 (NM\_001171800)**

ATGGAAGTATCCGCCGACCAACCCCGATGGATGAGCCATCACCACCCATCGGTGCTAAAC  
GAACAGCATCCCGGCTCGCACCACCCGGGCCTCGGCCACTCGTACATGGACCCCTCGCAGT  
ATCCCCTCGCCGACGATGTGGATGTACTGTTTAATATCGACTCACAGGGCAACCACGTATC  
TCCATACTATGGGAACTCAGTCCGAGCCGTCCAGAGGTATCCACCTCCTCCACATAGTAGT  
CAGGTGTGTCGCCCCCTCTCTACTGCACGGCTCTCTGCCGTGGCTGGACGGAAGCAAAGCGA  
TGCAGCACCACAGCACTTCCCCGTGGAACCTGAGTCCTTTCCAGAAGAGCTCACTGCACCA  
CGGTTCCCCGGCAGGTCTCTCTGTCTACCCTTCGGCGTCTCTCCTCCTCCCTGTCTGGGGGCC  
ACTCAAGCCCGCACCTCTTCACCTTTCCCCCCTCCTCCGAAAGACGTGTCCCCAGACCCA  
GGCATCTCCACTCCGGGCTCAAGCAGCAACAGTCGCCAACAGGAGGAGAAAGAGTGCATA  
AAGTACCAGGTGTCCCTGGCCGAGAGCATGAACTGGAGTCTCACAGCCGGAGCATGGCA  
TCAATCGGAGCGCAATCCTCCGCCACCATCATCACCCCATCGCCACATACCCATCCTATG  
TCCCCGAATACGGCCCAGGCCTCTTCCCACCAAGTAGCCTGATAGGTGGGTCATCTTCTAG  
TTATGGTTCCAAAACAAGACCAAAAACAAGGTCATGTTCAGAAGGTAGAGAGTGCGTTAA  
CTGTGGAGCTACGTGCACCCCGCTCTGGAGGCGGGATGGCACGGGTCATATTTGTGTAAC  
GCCTGCGGACTCTATCACAAGATGAACGGGCAGAATCGGCCCTCATCAAACCCAAGCGA  
CGACTGTCTGCAGCAAGACGGGCAGGAACATCATGTGCAAACGTGCAAACGAGCACGACA  
ACACTGTGGCGAAGAAACGCCAACGGGGACCCCGTGTGTAACGCTTGCGGTCTATACTAC  
AAACTGCACAATATCAACCGACCTCTCACCATGAAGAAGGAGGGCATTTCAGACCAGGAAC  
AGGAAGATGTCCAGCAAGTCGAAGAAGAGCAAAAAGTCCCACGACAGCATGGACGACTTC  
TCCAAGAGCCTGATGGAGAAGAGCAGCTCGTTCAGCCCCGCCGCTCTGTCCCGCCACATGT  
CCTCCTTCCCCCCTTCTCACACTCCGGCCACATGCTGTCCACCCCCACGCCCATGCACCCC  
TCCTCCTTCGCCCCCTCACCCCACTCCAGTATGGTCTCTGCCATGGGCTAG

**STAT6 (AGKD04000009, GBRB01023434)**

ATGGCACAGTGGACGCAGATGAAACAGCTGATCCCCTATCTGGCCACACAGACCCTCAAC  
GAGCTCTACTCCCCCTCCTTTCCCATGGACGTCAGGTGCTACCTGGCCAACTGGATCGAGG  
AGCAGAGATGGGAGGACTTTGAACCAGAGAAGGTAGACCAGGAGCCCCAGGCTCTGACC  
CTGCTCGATCAGATCATATCCTGCCTACAGAATCTAGCCGGGCAGAACCCCAACGTGGTG  
GAGAGGATGAGGCTGCAGCATATCTCCAGGAACATGAATATGTTCCGCTCCCAACCTTTC  
CAGCTGGTACTCACAGTCAGGGATGTCCTGAGGAAGGAGAGAGAGCTGCTCAGTCAAGC  
GTCTACCCAGATCCCGGCCCTAGCCCTCTTCTCTCAACCCCAAGCCAGGATTCCATGGCT  
GCAGCCCCCCCCACCAGAGACGTGGACCTGCTTGTGCTCAAGGTGCTTGAGATCCAGGAC  
TGCAGACAGCAGATCCACCAGCTGCAGGAGGAGCTCAACTGGGAGAGGCAGAACTATGA  
GTCCATGCAGGGCACTCTCCAGCAGACCCAGACCAATGGGATGGACTCCAGCATTTTCAGA  
AGTCACCAAACCTCCAGACTAACATCAAACAGCATGAGTACAATGGCCAAGTCATAGCCA  
AGAAGCGTGTCCAGCTGCTCCAGGAGGCAGTGTCTAGTCTGGAGAAGTGTCAGTCTCGTC  
TGATCAGCAGGATCAAAGCCTGGAGGTGGGAACAGCATCAAGCTACTATTGGACACCCCT  
TCGATGACAACCTCAGCCCTCTGCAGACGTGGTGTGAACAACCTCCTGGGGGTGAACGGGA

AGTTGAGACAGGAAGTGATGCTGGCCGGGGAACCAATCCCAGAGCTGCAAGAGAGACTG  
GGACGTCTGCTGCAAACCTCTAATCCAGAGCTCCCTGATGGTGGACAAGCAGCCTCCCCAG  
GTGATTAAGACCCAGTCTAAGTTCTCCACCACGGTGCGCTACCTGCTGGGGGAGAAGGTG  
GCACCCGGGAAACCAGTCTCTTCAAGGCCAGATCATCACTGAGGCCAGGCTAGGAAC  
CTCGGACAGCTGGGCAGCGTACCCAGTGAGAATGTTGGAGAGTTGATCAATAACACAGCC  
ATTTTGGAACACAACACTTCCAGCAAGAGTACATGTGCCACCTTCAGGAACATGTCTATA  
AAGAAGATCAAGCGAGCAGACAGAAAGGGGTCAGAGTCTGTTACAGAGGAGAAGTTTGC  
GCTCTTCTTCACCACAGAGATCAGCATCACTGGCTGTGACATTCCCTACAGAATACAGAT  
GATCTCTGTGCCGGTGGTGGTGATCGTTCACGGTAGTCAGGATAACAATGCCCTAGCAAC  
CATCATCTGGGACTGTGCCTTTTCTGAACCGGAAAGGATTCCGTTTTTGGTTCCGGAACGC  
GTTCCCTGGAAGCAGATGTGCAGGACCCTGAACAGTAAGTTCATGTCGGAGGTCGGAACG  
CAGCGTTGCCTAGACAACTACAACCAACACTTCCTGGCCCAAAGATCTTCGACAAGCCA  
GACATCGCTGGAGACTACAGCAACATGCTGGTATCCTGGGCACAGTTCAACAAGGAGGTG  
CTCCCTGGACGACCTTTCACCTTTTGGCAGTGGTTTGATGGTGTGATAGAGCTTACCAAGA  
AGCACCTGAAGAGCTACTGGAGTGACGGGTTGATATTTGGTTTCATCGGTAAGCAGCACC  
TCCACCTGATTCTGAAGGACCGGCCAACGGGACCTTCTTACTGCGCTTCAGCGACTCTGA  
GATAGGAGGCATCACCATCGCATACGTGGCTCCATCAGAGAACGGGGGCCAGAAGATCC  
AGAATATTCAACCGTCCACCAAGAGAGACTTGGAGATCCGTTCCCTTGGTGACCGTATTC  
AAGACATCGACTTCATCACACACGTGTATCCAGATCTGCCGAAGAATGACGTGTTCAGAA  
AATACTACACAGGCAAGTCCACACACACACACACGAGTCTGAATCACTCACTCACATATG  
CACACACACACACACTTCACAAGGTCTTCATCATTCTCTCTTAGGGACCAGGGGAATGGA  
GCCAGTGCATCACCATTCTACTCTCTCTCTCCGAACAACCAGTTCCAAACCCCTTCCAGC  
TGGCCCCAGTACCCCTACAGGGGGGAATGTACTCTGACCCCTCTCCAATCCCAATGGAC  
TCTTCCCTGGCCCGGACATGTGAGTGA

#### **IL-4/13A (AB574339)**

ATGAAGTCGGTGATCCTTCTCTCTGTTGCGATGGTGCTATTTAACTCTGGAACCTCTGCCTGCC  
AACGCTGCAGCGTACCGGCAGCATAAAAATCACCATTCCAATTTAGAGGCAATTATTAGCA  
TGGCGGAACAATACACACACAATCTGACAGAGGATCTTCTGAGAACATTACTCATAGATGT  
TACACATTTGACTGGGACCACCACAAAATGCAAGGAGTTCTTCTGCGAAGCTGAGAAAATC  
TTGGCCTCCGTGAAAAATGCCACGTTTGGAAATATTGTCCGACATCTGAGGGTTTACAACAA  
ACATCAATACTGCATCGTTGTGAAGAGCCAAGACAACCAGGCGGAGGGCAACCAGGTGGA  
GCTGAGGAGACTTCTCCTCGACTTAAAAGAATGTGGCCAAAAAATCAACTCCAAACCATGA

#### **IL-4/13B1 (GBRB01017951)**

ATGAAGACTCTTGCTCTCCTCTTCTCCTTTGCATTTGTGCTGGTCTTCACTGCGCCCACTAA  
GACATCTGATGAGCATCATCTACTGAGGAGGATCATGATCAAGGCTAACAAGACCCGCGA  
TGAAGGCCCGGAGGCCCTTTTGGACAGTCTAGTGCCAGCGCAATTCAATCAAGTTCGCTG  
CAAGGAACACGGGCCTAAAGATTTCTGCATAGCGGAGAAGATTCTGTCTAACATAAACGA  
AGAGCAGTACGGGACTTCAGACAACAACATTGGGACAATCAGCAGAGAGCTGAAGCAGT  
ACAATATGCTTCACCCTTCCAACCTGCACAGTGAAGAATAACGTTGACGAGGAACAGCTCC

GCGCTCTCCTGATGAACCTCTACGACTGTGCCCAAATCATCTATGCCCCGTCCCCACCCTGT  
CACTCATCACAAAACGACCCCAGCACTTTGA

**IL-4/13B2 (AGKD04001089)**

ATGAAGACTGTCACACTCCTCTTCTCCTTTGCATTTGTGCTGGTCTTCACTGCGCCCCACTGA  
TGAGACTCATCTATTGCTTACGATCATCGACGAGGCTAACAAGATCCTCAATGGAGGTTT  
GGAGTTTCAGGCCCTTGTGGACAGTCTAGTGCCAGCGGGATTCGATCAAGATCGCTGCAG  
GGAAAACGGGCCTGAAGATTTCTGCATAGCTGAGACTATTCTGTCTGCCATAAACCATGC  
GCAGTACAGGAGTCCATTAAACAACATATCTAAAATCAGTAGAGTGCTGAAGCTGTACAA  
TAAGTTTCATCCAACCAACTGCACTGTGAAGGAGAACGGTGATGAGGAACAGCTCCACGA  
TCTCCTGACAAACCTCTTCAACTGTGCCCAGGCCATTTACTCTTGTCCCTCACCTGCCGCT  
CATCACAACAACCCTATAG

**References**

1. Dijkstra, J.M. TH2 and T<sub>reg</sub> candidate genes in elephant shark. *Nature* **2014**, *511*, E7–E9.

© 2015 by the authors; licensee MDPI, Basel, Switzerland. This article is an open access article distributed under the terms and conditions of the Creative Commons Attribution license (<http://creativecommons.org/licenses/by/4.0/>).
